# Supplementary material for: Locally renewing resident synovial macrophages provide a protective barrier for the joint
Source: Springer Nature journal article supplement (doi:10.1038/s41586-019-1471-1), 2019-08-07
Supplement: 41586_2019_1471_MOESM1_ESM.pdf [file 41586_2019_1471_MOESM1_ESM.pdf]

In the format provided by the authors and unedited.

# Locally renewing resident synovial macrophages provide a protective barrier for the joint

Stephan Culemann<sup>1,2,11</sup>, Anika Grüneboom<sup>1,2,11</sup>, José Ángel Nicolás-Ávila<sup>3</sup>, Daniela Weidner<sup>1,2</sup>, Katrin Franziska Lämmle<sup>1,2</sup>, Tobias Rothe<sup>1,2</sup>, Juan A. Quintana<sup>3</sup>, Philipp Kirchner<sup>4</sup>, Branislav Krljanac<sup>5</sup>, Martin Eberhardt<sup>6</sup>, Fulvia Ferrazzi<sup>4</sup>, Elke Kretzschmar<sup>7</sup>, Martin Schicht<sup>7</sup>, Kim Fischer<sup>1</sup>, Kolja Gelse<sup>8</sup>, Maria Faas<sup>1,2</sup>, René Pfeifle<sup>1,2</sup>, Jochen A. Ackermann<sup>1,2</sup>, Milena Pachowsky<sup>8</sup>, Nina Renner<sup>8</sup>, David Simon<sup>1</sup>, Reiner F. Haseloff<sup>9</sup>, Arif B. Ekici<sup>4</sup>, Tobias Bäuerle<sup>10</sup>, Ingolf E. Blasig<sup>9</sup>, Julio Vera<sup>6</sup>, David Voehringer<sup>5</sup>, Arnd Kleyer<sup>1</sup>, Friedrich Paulsen<sup>7</sup>, Georg Schett<sup>1</sup>, Andrés Hidalgo<sup>3</sup> & Gerhard Krönke<sup>1,2\*</sup>

<sup>1</sup>Department of Internal Medicine 3 - Rheumatology and Immunology, Universitätsklinikum Erlangen and Friedrich-Alexander University Erlangen-Nürnberg (FAU), Erlangen, Germany. <sup>2</sup>Nikolaus Fiebiger Center of Molecular Medicine, Universitätsklinikum Erlangen and Friedrich-Alexander University Erlangen-Nürnberg (FAU), Erlangen, Germany. <sup>3</sup>Area of Cell and Developmental Biology, Centro Nacional de Investigaciones Cardiovasculares Carlos III, Madrid, Spain. <sup>4</sup>Institute of Human Genetics, Universitätsklinikum Erlangen and Friedrich-Alexander University Erlangen-Nürnberg (FAU), Erlangen, Germany. <sup>5</sup>Department of Infection Biology, Universitätsklinikum Erlangen, Friedrich Alexander University Erlangen-Nürnberg (FAU), Erlangen, Germany. <sup>6</sup>Laboratory of Systems Tumor Immunology, Department of Dermatology, Universitätsklinikum Erlangen and Friedrich-Alexander University Erlangen-Nürnberg (FAU), Erlangen, Germany. <sup>7</sup>Department of Functional and Clinical Anatomy, Friedrich-Alexander University Erlangen-Nürnberg (FAU), Erlangen, Germany. <sup>8</sup>Department of Trauma Surgery, Universitätsklinikum Erlangen, Friedrich Alexander University Erlangen-Nürnberg (FAU), Erlangen, Germany. <sup>9</sup>Leibniz Research Institute of Molecular Pharmacology, Berlin, Germany. <sup>10</sup>Institute of Radiology, PIPE (Preclinical Imaging Platform Erlangen), Universitätsklinikum Erlangen and Friedrich-Alexander University Erlangen-Nürnberg (FAU), Erlangen, Germany. <sup>11</sup>These authors contributed equally: Stephan Culemann, Anika Grüneboom.  
\*e-mail: [gerhard.kroenke@uk-erlangen.de](mailto:gerhard.kroenke@uk-erlangen.de)

**Supplementary Table 1: Marker genes of clusters of scRNA-seq data of sorted synovial CD45<sup>+</sup>Cd11b<sup>+</sup>Ly6G<sup>-</sup> mononuclear phagocytes during steady**

Differentially expressed genes were identified using the Wilcoxon Rank Sum test. Adjusted p-values based on Bonferroni correction using all genes in the dataset. n=7362 cells.

| gene     | p_val     | avg_logFC | p_val_adj | cluster |
|----------|-----------|-----------|-----------|---------|
| Aqp1     | 2,08E-126 | 0,6736365 | 1,60E-122 | 0       |
| Fxyd2    | 9,21E-117 | 0,5703077 | 7,08E-113 | 0       |
| Tppp3    | 6,33E-76  | 0,531636  | 4,87E-72  | 0       |
| Cd9      | 5,34E-68  | 0,3820029 | 4,11E-64  | 0       |
| Lyve1    | 4,71E-33  | 0,3407805 | 3,63E-29  | 0       |
| Anxa1    | 6,94E-33  | 0,3828428 | 5,34E-29  | 0       |
| Cyb5r3   | 3,85E-18  | 0,3480845 | 2,96E-14  | 0       |
| Ifi2712a | 7,85E-18  | 0,3258748 | 6,04E-14  | 0       |
| H2-Ab1   | 0         | 1,3123438 | 0         | 1       |
| H2-Eb1   | 0         | 1,2994284 | 0         | 1       |
| H2-Aa    | 0         | 1,2754512 | 0         | 1       |
| Cd74     | 0         | 1,2564388 | 0         | 1       |
| H2-DMa   | 6,07E-178 | 1,0761156 | 4,67E-174 | 1       |
| Cd52     | 3,26E-128 | 0,8869993 | 2,51E-124 | 1       |
| Mgl2     | 1,18E-103 | 0,8693339 | 9,09E-100 | 1       |
| S100a11  | 1,79E-32  | 0,4324623 | 1,38E-28  | 1       |
| Gm2a     | 9,77E-23  | 0,3715456 | 7,52E-19  | 1       |
| Lsp1     | 2,60E-17  | 0,3379984 | 2,00E-13  | 1       |
| Coro1a   | 1,50E-16  | 0,3294116 | 1,16E-12  | 1       |
| Pim1     | 3,46E-15  | 0,2763688 | 2,67E-11  | 1       |
| Retnla   | 6,93E-12  | 0,2607837 | 5,33E-08  | 1       |
| Clec4a2  | 2,98E-11  | 0,2630623 | 2,30E-07  | 1       |
| Ccl8     | 8,91E-142 | 1,1374496 | 6,86E-138 | 2       |
| Ccl2     | 1,54E-128 | 0,9616653 | 1,19E-124 | 2       |
| Ccl7     | 9,39E-117 | 1,1044551 | 7,22E-113 | 2       |
| Cxcl2    | 3,55E-97  | 0,9394747 | 2,73E-93  | 2       |
| Dusp1    | 2,99E-79  | 0,6288709 | 2,30E-75  | 2       |
| Zfp36    | 1,63E-78  | 0,7146728 | 1,26E-74  | 2       |
| Junb     | 9,58E-70  | 0,5732462 | 7,37E-66  | 2       |
| Pf4      | 2,63E-68  | 0,3012539 | 2,03E-64  | 2       |
| Fos      | 2,19E-64  | 0,5065967 | 1,69E-60  | 2       |
| Atf3     | 5,18E-61  | 0,6610085 | 3,99E-57  | 2       |
| Mt1      | 6,69E-59  | 0,4704272 | 5,15E-55  | 2       |
| Ier3     | 1,99E-54  | 0,6134144 | 1,53E-50  | 2       |
| Ccl4     | 2,98E-45  | 0,7144859 | 2,30E-41  | 2       |
| Nfkbia   | 2,77E-42  | 0,5056772 | 2,13E-38  | 2       |
| Retnla   | 1,94E-40  | 0,5362326 | 1,49E-36  | 2       |
| Ccl24    | 9,89E-40  | 0,553219  | 7,61E-36  | 2       |

|          |           |           |           |   |
|----------|-----------|-----------|-----------|---|
| Marcksl1 | 7,71E-37  | 0,5512683 | 5,93E-33  | 2 |
| Cxcl13   | 1,42E-36  | 0,7281834 | 1,09E-32  | 2 |
| Jun      | 1,75E-35  | 0,4773535 | 1,35E-31  | 2 |
| Ccl3     | 6,74E-34  | 0,5196627 | 5,18E-30  | 2 |
| Mt2      | 7,36E-27  | 0,4592874 | 5,66E-23  | 2 |
| Klf6     | 6,45E-26  | 0,361174  | 4,96E-22  | 2 |
| Pim1     | 1,63E-22  | 0,4248209 | 1,25E-18  | 2 |
| Ccl6     | 2,15E-22  | 0,289203  | 1,65E-18  | 2 |
| Ifitm3   | 5,86E-21  | 0,3947271 | 4,51E-17  | 2 |
| Cd83     | 1,69E-20  | 0,4418688 | 1,30E-16  | 2 |
| Btg2     | 1,49E-17  | 0,3903928 | 1,14E-13  | 2 |
| Klf4     | 3,33E-17  | 0,3584172 | 2,56E-13  | 2 |
| Hspa1a   | 5,42E-16  | 0,3506177 | 4,17E-12  | 2 |
| Ubc      | 2,87E-14  | 0,2802804 | 2,21E-10  | 2 |
| Ier2     | 3,30E-13  | 0,3135671 | 2,54E-09  | 2 |
| Mrc1     | 8,83E-13  | 0,2681005 | 6,79E-09  | 2 |
| Mcl1     | 7,76E-11  | 0,2839753 | 5,97E-07  | 2 |
| Maf      | 6,37E-10  | 0,2606169 | 4,90E-06  | 2 |
| Vsig4    | 4,40E-201 | 0,8613897 | 3,39E-197 | 3 |
| Sparc    | 2,19E-178 | 0,9223244 | 1,69E-174 | 3 |
| Ctsd     | 6,78E-167 | 0,7790815 | 5,22E-163 | 3 |
| Lyz2     | 3,16E-142 | 0,3679368 | 2,43E-138 | 3 |
| Srgn     | 5,64E-133 | 0,6431507 | 4,34E-129 | 3 |
| S100b    | 6,10E-114 | 0,9235882 | 4,69E-110 | 3 |
| Fn1      | 1,48E-104 | 0,7875353 | 1,14E-100 | 3 |
| TdTomato | 3,36E-101 | 0,6282756 | 2,58E-97  | 3 |
| ApoE     | 1,59E-82  | 0,4970414 | 1,22E-78  | 3 |
| Wfdc17   | 1,85E-61  | 0,3771949 | 1,43E-57  | 3 |
| Hexb     | 4,49E-53  | 0,5332315 | 3,45E-49  | 3 |
| Nupr1    | 1,52E-48  | 0,5209451 | 1,17E-44  | 3 |
| Grn      | 1,41E-39  | 0,3273935 | 1,08E-35  | 3 |
| Ltc4s    | 9,73E-30  | 0,4091973 | 7,49E-26  | 3 |
| Trem2    | 6,08E-26  | 0,3027722 | 4,68E-22  | 3 |
| Syng1    | 7,69E-25  | 0,4302726 | 5,91E-21  | 3 |
| Cd68     | 8,63E-20  | 0,2854543 | 6,64E-16  | 3 |
| Folr2    | 3,43E-19  | 0,2723361 | 2,64E-15  | 3 |
| Tmem37   | 1,45E-18  | 0,3606988 | 1,12E-14  | 3 |
| Camk1    | 4,37E-18  | 0,3407961 | 3,36E-14  | 3 |
| Pltp     | 1,11E-16  | 0,2589247 | 8,54E-13  | 3 |
| Timp2    | 5,52E-16  | 0,2881948 | 4,25E-12  | 3 |
| Nfkb1a   | 3,28E-15  | 0,2785373 | 2,52E-11  | 3 |
| Cd83     | 1,55E-12  | 0,2532039 | 1,19E-08  | 3 |
| Ccl3     | 1,05E-11  | 0,3282611 | 8,04E-08  | 3 |

|               |           |           |           |   |
|---------------|-----------|-----------|-----------|---|
| Cbr2          | 2,40E-10  | 0,2831758 | 1,85E-06  | 3 |
| Man2b1        | 3,07E-10  | 0,2506817 | 2,36E-06  | 3 |
| Stmn1         | 0         | 1,9883782 | 0         | 4 |
| Ube2c         | 0         | 1,5257583 | 0         | 4 |
| Birc5         | 0         | 1,5035044 | 0         | 4 |
| Tubb5         | 1,91E-90  | 1,1612494 | 1,47E-86  | 4 |
| Hmgb2         | 4,02E-84  | 1,3042904 | 3,09E-80  | 4 |
| Tuba1b        | 1,19E-51  | 0,9465081 | 9,16E-48  | 4 |
| Tubb4b        | 9,46E-51  | 0,9793549 | 7,28E-47  | 4 |
| Ptma          | 2,27E-41  | 0,6109267 | 1,75E-37  | 4 |
| H2afz         | 8,42E-41  | 0,7556469 | 6,48E-37  | 4 |
| Vim           | 6,50E-20  | 0,3351131 | 5,00E-16  | 4 |
| Tuba1c        | 8,21E-20  | 0,686901  | 6,32E-16  | 4 |
| S100a10       | 1,68E-19  | 0,3718145 | 1,29E-15  | 4 |
| Ran           | 2,19E-19  | 0,6049653 | 1,69E-15  | 4 |
| Tmsb10        | 3,32E-19  | 0,7790258 | 2,56E-15  | 4 |
| Hmgb1         | 1,70E-18  | 0,5692362 | 1,31E-14  | 4 |
| Rbm3          | 2,71E-15  | 0,4156219 | 2,09E-11  | 4 |
| Jpt1          | 6,26E-15  | 0,5551576 | 4,81E-11  | 4 |
| Txn1          | 9,75E-14  | 0,3903175 | 7,50E-10  | 4 |
| S100a11       | 1,20E-13  | 0,4070792 | 9,24E-10  | 4 |
| Arl6ip1       | 6,53E-13  | 0,5886488 | 5,02E-09  | 4 |
| Pkm           | 5,57E-12  | 0,4473849 | 4,28E-08  | 4 |
| Tagln2        | 9,40E-12  | 0,4175422 | 7,23E-08  | 4 |
| Lgals1        | 1,37E-09  | 0,2828733 | 1,06E-05  | 4 |
| Anxa2         | 1,66E-09  | 0,2961342 | 1,28E-05  | 4 |
| Nme1          | 8,69E-09  | 0,3816342 | 6,69E-05  | 4 |
| Gapdh         | 9,22E-09  | 0,2811553 | 7,09E-05  | 4 |
| Anxa1         | 1,04E-08  | 0,32088   | 8,01E-05  | 4 |
| Ranbp1        | 1,88E-08  | 0,4794453 | 0,0001444 | 4 |
| Lgals3        | 3,11E-08  | 0,3503709 | 0,0002393 | 4 |
| Slc25a5       | 9,81E-08  | 0,2985713 | 0,0007546 | 4 |
| Hnrnpa3       | 3,08E-07  | 0,3332675 | 0,0023683 | 4 |
| Snrpe         | 9,18E-07  | 0,3444897 | 0,0070639 | 4 |
| Cbx3          | 3,78E-06  | 0,3421318 | 0,0290823 | 4 |
| Cd74          | 3,93E-06  | 0,2600467 | 0,0301999 | 4 |
| Ncl           | 4,62E-06  | 0,3497589 | 0,0355218 | 4 |
| Snrpg         | 5,04E-06  | 0,3364192 | 0,0387422 | 4 |
| Plp2          | 1,04E-05  | 0,3237461 | 0,0798119 | 4 |
| Atpif1        | 1,95E-05  | 0,25408   | 0,1503251 | 4 |
| Ldha          | 9,42E-05  | 0,2986766 | 0,7249773 | 4 |
| 1810037117Rik | 0,000509  | 0,2889512 | 1         | 4 |
| Npm1          | 0,0015293 | 0,2583716 | 1         | 4 |

|          |           |           |           |   |
|----------|-----------|-----------|-----------|---|
| Mif      | 0,0023476 | 0,2742538 | 1         | 4 |
| Acp5     | 0         | 3,319558  | 0         | 5 |
| Ctsk     | 0         | 3,2098538 | 0         | 5 |
| Mmp9     | 0         | 2,9319411 | 0         | 5 |
| Atp6v0d2 | 0         | 1,6317394 | 0         | 5 |
| Atp6v1g1 | 1,03E-32  | 0,714602  | 7,90E-29  | 5 |
| Atp6v1b2 | 3,61E-32  | 0,8484075 | 2,78E-28  | 5 |
| S100a4   | 2,88E-24  | 0,3580755 | 2,22E-20  | 5 |
| Rplp0    | 2,24E-21  | 0,3789065 | 1,72E-17  | 5 |
| Atp6v0e  | 1,59E-19  | 0,5791218 | 1,22E-15  | 5 |
| Clec12a  | 2,15E-19  | 0,6797228 | 1,65E-15  | 5 |
| Atp5b    | 5,04E-19  | 0,5895514 | 3,88E-15  | 5 |
| Atp6ap2  | 4,55E-18  | 0,6521125 | 3,50E-14  | 5 |
| Txn1     | 5,73E-18  | 0,5953859 | 4,41E-14  | 5 |
| Aldoa    | 2,06E-16  | 0,5445913 | 1,59E-12  | 5 |
| Vim      | 7,63E-16  | 0,3266097 | 5,87E-12  | 5 |
| Cstb     | 3,91E-14  | 0,4908419 | 3,01E-10  | 5 |
| Mdh2     | 4,74E-13  | 0,5192962 | 3,64E-09  | 5 |
| Atp5g3   | 2,82E-12  | 0,548405  | 2,17E-08  | 5 |
| Sh3bgrl3 | 3,88E-12  | 0,2901452 | 2,98E-08  | 5 |
| Mrpl52   | 4,78E-12  | 0,4990309 | 3,67E-08  | 5 |
| Atp6v0b  | 1,01E-11  | 0,4278917 | 7,75E-08  | 5 |
| Uqcr10   | 2,98E-11  | 0,4624327 | 2,29E-07  | 5 |
| Rps8     | 4,25E-11  | 0,2593157 | 3,27E-07  | 5 |
| Rps19    | 1,35E-10  | 0,2506816 | 1,04E-06  | 5 |
| Ndufb5   | 1,62E-10  | 0,4361181 | 1,25E-06  | 5 |
| Slc25a3  | 1,73E-10  | 0,3565163 | 1,33E-06  | 5 |
| Uqcrrs1  | 1,81E-10  | 0,4944496 | 1,40E-06  | 5 |
| Cox5a    | 3,70E-10  | 0,3842793 | 2,85E-06  | 5 |
| Rps13    | 3,78E-10  | 0,2747031 | 2,91E-06  | 5 |
| Atp5c1   | 6,70E-10  | 0,4545524 | 5,16E-06  | 5 |
| Rps16    | 1,14E-09  | 0,2777837 | 8,74E-06  | 5 |
| Cox6b1   | 1,18E-09  | 0,3151552 | 9,10E-06  | 5 |
| Mdh1     | 2,11E-09  | 0,4637367 | 1,62E-05  | 5 |
| Ccl9     | 2,52E-09  | 0,3447143 | 1,94E-05  | 5 |
| Slc25a4  | 2,27E-08  | 0,3759794 | 0,0001746 | 5 |
| Cycs     | 1,09E-07  | 0,4182443 | 0,0008364 | 5 |
| Atp5a1   | 1,37E-07  | 0,4350791 | 0,0010554 | 5 |
| Ndufab1  | 1,49E-07  | 0,3768366 | 0,0011467 | 5 |
| Gpr137b  | 2,55E-07  | 0,3731087 | 0,0019642 | 5 |
| Atp5o    | 2,65E-07  | 0,3711643 | 0,0020417 | 5 |
| Rps7     | 3,84E-07  | 0,270865  | 0,002953  | 5 |
| Ndufv2   | 4,61E-07  | 0,3838279 | 0,0035454 | 5 |

|         |           |           |           |   |
|---------|-----------|-----------|-----------|---|
| Arf1    | 5,91E-07  | 0,3578269 | 0,0045439 | 5 |
| Rpl36al | 6,23E-07  | 0,346795  | 0,0047959 | 5 |
| Slc25a5 | 8,31E-07  | 0,3103557 | 0,0063954 | 5 |
| Npm1    | 9,10E-07  | 0,3250698 | 0,0070003 | 5 |
| Rpl10a  | 1,29E-06  | 0,2620756 | 0,0099586 | 5 |
| Ndufb8  | 2,06E-06  | 0,3234848 | 0,0158748 | 5 |
| Uqcrb   | 5,78E-06  | 0,285285  | 0,0444756 | 5 |
| Ndufc2  | 7,14E-06  | 0,3436336 | 0,0549421 | 5 |
| Cox6c   | 8,31E-06  | 0,2535836 | 0,0639383 | 5 |
| Slc39a1 | 1,65E-05  | 0,3069946 | 0,1269292 | 5 |
| Atpif1  | 1,83E-05  | 0,3071665 | 0,1410906 | 5 |
| Uqcrc1  | 1,89E-05  | 0,3785272 | 0,1454475 | 5 |
| Atp6v1f | 2,06E-05  | 0,3204882 | 0,1583911 | 5 |
| Actr3   | 3,77E-05  | 0,2794907 | 0,2898158 | 5 |
| Polr1d  | 5,16E-05  | 0,3399788 | 0,3968503 | 5 |
| Atp5g2  | 7,06E-05  | 0,2973603 | 0,5430191 | 5 |
| Sec11c  | 7,19E-05  | 0,2802466 | 0,5531323 | 5 |
| Vdac2   | 8,09E-05  | 0,3020719 | 0,6224995 | 5 |
| Ndufs7  | 0,0001196 | 0,3316647 | 0,9203837 | 5 |
| Nop10   | 0,0002573 | 0,288013  | 1         | 5 |
| Atp5f1  | 0,0003718 | 0,2761075 | 1         | 5 |
| Ndufa1  | 0,0008182 | 0,313692  | 1         | 5 |
| Cox7b   | 0,0008272 | 0,2930384 | 1         | 5 |
| Usmg5   | 0,0016196 | 0,2652113 | 1         | 5 |
| Clec4a2 | 0,003731  | 0,2547257 | 1         | 5 |
