# Supplementary material for: Locally renewing resident synovial macrophages provide a protective barrier for the joint
Source: Springer Nature journal article supplement (doi:10.1038/s41586-019-1471-1), 2019-08-07
Supplement: 41586_2019_1471_MOESM3_ESM.pdf [file 41586_2019_1471_MOESM3_ESM.pdf]

**Supplementary Table 2: Marker genes of clusters of scRNA-seq data of sorted synovial CD45<sup>+</sup>Cd11b<sup>+</sup>Ly6G<sup>-</sup> mononuclear phagocytes at day 5 post K/BxN serum transfer**

Differentially expressed genes were identified using the Wilcoxon Rank Sum test. Adjusted p-values based on Bonferroni correction using all genes in the dataset. n=3237 cells.

| gene    | p_val     | avg_logFC  | p_val_adj | cluster |
|---------|-----------|------------|-----------|---------|
| Plac8   | 0         | 2,52300046 | 0         | 0       |
| Hp      | 0         | 2,06883801 | 0         | 0       |
| Ly6c2   | 0         | 1,73516456 | 0         | 0       |
| Ms4a4c  | 0         | 1,69234936 | 0         | 0       |
| Sirpb1c | 0         | 1,67430965 | 0         | 0       |
| Cd52    | 1,99E-294 | 1,43076069 | 2,47E-290 | 0       |
| Ifitm3  | 2,30E-287 | 1,78873659 | 2,86E-283 | 0       |
| Ccr2    | 1,53E-260 | 1,35862323 | 1,90E-256 | 0       |
| Tmsb10  | 6,78E-259 | 1,55230843 | 8,44E-255 | 0       |
| Mcomp1  | 9,82E-257 | 1,27425037 | 1,22E-252 | 0       |
| Emb     | 1,49E-251 | 1,33036411 | 1,85E-247 | 0       |
| Thbs1   | 5,47E-244 | 1,63437119 | 6,81E-240 | 0       |
| Napsa   | 5,32E-236 | 1,22168451 | 6,63E-232 | 0       |
| Coro1a  | 9,07E-236 | 1,13392979 | 1,13E-231 | 0       |
| Msrb1   | 3,95E-231 | 1,36089362 | 4,91E-227 | 0       |
| Ifitm2  | 1,13E-229 | 1,0003273  | 1,40E-225 | 0       |
| Il1b    | 2,10E-229 | 2,1185478  | 2,61E-225 | 0       |
| Ifitm6  | 6,40E-223 | 1,66292653 | 7,97E-219 | 0       |
| Plbd1   | 9,59E-219 | 1,04646211 | 1,19E-214 | 0       |
| Clec4e  | 3,57E-215 | 1,27492179 | 4,45E-211 | 0       |
| Ms4a6c  | 5,94E-212 | 1,06624445 | 7,40E-208 | 0       |
| Lst1    | 8,09E-210 | 1,22365761 | 1,01E-205 | 0       |
| Rplp0   | 9,35E-210 | 0,75284936 | 1,16E-205 | 0       |
| Pkm     | 6,25E-208 | 1,0523869  | 7,77E-204 | 0       |
| Tyropb  | 1,73E-199 | 0,58458152 | 2,15E-195 | 0       |
| S100a11 | 2,33E-187 | 0,9866723  | 2,91E-183 | 0       |
| Ltb4r1  | 1,18E-186 | 1,04262787 | 1,46E-182 | 0       |
| Actg1   | 2,59E-182 | 0,81750302 | 3,22E-178 | 0       |
| Slpi    | 6,18E-175 | 1,41857082 | 7,70E-171 | 0       |
| H3f3a   | 8,70E-175 | 0,64173382 | 1,08E-170 | 0       |
| Gm9733  | 1,47E-164 | 0,92545921 | 1,84E-160 | 0       |
| Chil3   | 4,50E-164 | 1,55379769 | 5,60E-160 | 0       |
| Gm5150  | 1,88E-161 | 0,77993018 | 2,34E-157 | 0       |
| Sirpb1b | 1,22E-158 | 0,81101755 | 1,51E-154 | 0       |
| Arpc1b  | 2,77E-154 | 0,57756739 | 3,45E-150 | 0       |
| Tgfb1   | 1,14E-153 | 0,90919276 | 1,42E-149 | 0       |
| Hspa8   | 2,04E-152 | 0,65235246 | 2,54E-148 | 0       |
| Srgn    | 1,63E-150 | 0,90051987 | 2,03E-146 | 0       |
| Taldo1  | 1,84E-150 | 0,90632109 | 2,30E-146 | 0       |
| Cd177   | 2,47E-145 | 0,72507329 | 3,07E-141 | 0       |
| Lgals3  | 1,89E-144 | 0,48440157 | 2,35E-140 | 0       |
| Tarm1   | 4,71E-144 | 0,73705324 | 5,86E-140 | 0       |
| F10     | 1,11E-140 | 0,87645911 | 1,38E-136 | 0       |
| Dmkn    | 5,90E-140 | 1,14120105 | 7,34E-136 | 0       |
| Clec4d  | 1,41E-135 | 0,91651601 | 1,76E-131 | 0       |
| Rps9    | 7,35E-133 | 0,45557039 | 9,14E-129 | 0       |
| Prdx5   | 3,57E-131 | 0,82680428 | 4,44E-127 | 0       |
| Rps6    | 1,09E-130 | 0,49688958 | 1,35E-126 | 0       |
| Klra2   | 2,11E-130 | 0,69807825 | 2,62E-126 | 0       |
| Fau     | 4,37E-126 | 0,39195916 | 5,44E-122 | 0       |
| Cytip   | 1,40E-125 | 0,84311022 | 1,75E-121 | 0       |
| Rpl13   | 1,32E-122 | 0,39994882 | 1,64E-118 | 0       |
| Gngt2   | 7,50E-121 | 0,90815646 | 9,33E-117 | 0       |
| Vcan    | 1,76E-120 | 0,9658204  | 2,19E-116 | 0       |
| Osm     | 1,25E-119 | 1,37405285 | 1,56E-115 | 0       |
| Ifitm1  | 3,74E-118 | 0,65749819 | 4,66E-114 | 0       |
| Cyp4f18 | 1,54E-117 | 0,8601857  | 1,92E-113 | 0       |
| Pim1    | 9,29E-116 | 0,99377937 | 1,16E-111 | 0       |
| Pla2g7  | 9,60E-116 | 0,97272123 | 1,19E-111 | 0       |
| Fcgr1   | 6,44E-114 | 0,92111999 | 8,01E-110 | 0       |
| Rps27   | 8,15E-113 | 0,35782953 | 1,01E-108 | 0       |
| Junb    | 1,51E-111 | 0,83441207 | 1,87E-107 | 0       |
| Prdx6   | 2,52E-110 | 0,90632532 | 3,14E-106 | 0       |

|          |           |            |           |   |
|----------|-----------|------------|-----------|---|
| Trem1    | 1,44E-107 | 0,61368769 | 1,79E-103 | 0 |
| H3f3b    | 1,81E-106 | 0,47117036 | 2,26E-102 | 0 |
| Btg1     | 5,83E-106 | 0,70696625 | 7,25E-102 | 0 |
| Rpl18a   | 1,45E-105 | 0,3934582  | 1,81E-101 | 0 |
| Ly6e     | 4,53E-104 | 0,66981937 | 5,64E-100 | 0 |
| Rps16    | 2,39E-103 | 0,38683312 | 2,97E-99  | 0 |
| Cd53     | 2,72E-103 | 0,64926675 | 3,38E-99  | 0 |
| Bin2     | 5,03E-103 | 0,77355109 | 6,26E-99  | 0 |
| Smox     | 7,22E-103 | 0,76558862 | 8,99E-99  | 0 |
| Tpd52    | 3,54E-101 | 0,75771786 | 4,41E-97  | 0 |
| Slc7a11  | 2,09E-100 | 0,88102819 | 2,60E-96  | 0 |
| Fxyd5    | 2,12E-98  | 0,4922635  | 2,63E-94  | 0 |
| Alox5ap  | 1,53E-97  | 0,49619789 | 1,90E-93  | 0 |
| Ms4a6d   | 1,52E-93  | 0,8181358  | 1,89E-89  | 0 |
| Clec4a2  | 5,20E-93  | 0,7597045  | 6,47E-89  | 0 |
| Fgr      | 1,17E-92  | 0,69301466 | 1,46E-88  | 0 |
| Lmnb1    | 3,08E-91  | 0,77394898 | 3,84E-87  | 0 |
| Sec61g   | 1,04E-88  | 0,50641706 | 1,30E-84  | 0 |
| Hif1a    | 1,21E-88  | 0,78667846 | 1,51E-84  | 0 |
| Sifn2    | 1,36E-88  | 0,73406473 | 1,69E-84  | 0 |
| Itgb7    | 8,84E-88  | 0,66108841 | 1,10E-83  | 0 |
| Rpl18    | 1,85E-86  | 0,41148349 | 2,31E-82  | 0 |
| AB124611 | 1,90E-86  | 0,68225231 | 2,36E-82  | 0 |
| Rbm3     | 2,88E-86  | 0,49890428 | 3,58E-82  | 0 |
| Zbp1     | 7,79E-86  | 0,63336015 | 9,69E-82  | 0 |
| Plaur    | 2,24E-85  | 0,83261721 | 2,79E-81  | 0 |
| Gm2a     | 7,00E-85  | 0,6494445  | 8,72E-81  | 0 |
| Fcer1g   | 9,71E-85  | 0,3228364  | 1,21E-80  | 0 |
| Actr3    | 3,56E-84  | 0,56397802 | 4,44E-80  | 0 |
| Tlr2     | 5,14E-83  | 0,79820508 | 6,39E-79  | 0 |
| Ctsh     | 5,99E-83  | 0,59281081 | 7,45E-79  | 0 |
| Fos      | 4,60E-82  | 0,69882515 | 5,73E-78  | 0 |
| Arhgdib  | 9,56E-82  | 0,57419223 | 1,19E-77  | 0 |
| Ier3     | 1,73E-80  | 1,20856228 | 2,16E-76  | 0 |
| Arpc2    | 3,13E-80  | 0,40320067 | 3,90E-76  | 0 |
| Ccl6     | 4,47E-80  | 0,8662862  | 5,56E-76  | 0 |
| Eno1     | 4,52E-79  | 0,56702468 | 5,63E-75  | 0 |
| Fam96a   | 7,72E-79  | 0,60979192 | 9,61E-75  | 0 |
| Ifi209   | 3,31E-78  | 0,55763962 | 4,12E-74  | 0 |
| Uck2     | 3,57E-78  | 0,62180197 | 4,45E-74  | 0 |
| H2-DMa   | 2,32E-76  | 0,48995961 | 2,89E-72  | 0 |
| Ppp1ca   | 4,70E-76  | 0,52272639 | 5,85E-72  | 0 |
| Emilin2  | 1,02E-75  | 0,67442936 | 1,27E-71  | 0 |
| Rps7     | 4,73E-74  | 0,3693767  | 5,89E-70  | 0 |
| Pld4     | 1,29E-73  | 0,59334029 | 1,61E-69  | 0 |
| Rpl4     | 3,76E-73  | 0,41993428 | 4,68E-69  | 0 |
| Rps19    | 7,17E-73  | 0,29062315 | 8,92E-69  | 0 |
| Rps14    | 9,56E-73  | 0,27944494 | 1,19E-68  | 0 |
| Clec4a3  | 5,16E-72  | 0,68520542 | 6,42E-68  | 0 |
| Lrrc25   | 1,16E-71  | 0,62611897 | 1,44E-67  | 0 |
| Rpl9     | 3,83E-71  | 0,34747766 | 4,77E-67  | 0 |
| Adam8    | 6,96E-70  | 0,66474845 | 8,66E-66  | 0 |
| H2afj    | 1,52E-69  | 0,54931491 | 1,89E-65  | 0 |
| Ncf4     | 3,57E-69  | 0,64082698 | 4,44E-65  | 0 |
| Igsf6    | 3,95E-69  | 0,63206349 | 4,92E-65  | 0 |
| Rnf149   | 4,27E-69  | 0,64119612 | 5,31E-65  | 0 |
| Rps27a   | 2,04E-68  | 0,28047554 | 2,54E-64  | 0 |
| Rnh1     | 4,61E-68  | 0,64931024 | 5,74E-64  | 0 |
| Msr1     | 3,69E-67  | 0,64399884 | 4,60E-63  | 0 |
| Rpl8     | 4,53E-67  | 0,33727662 | 5,63E-63  | 0 |
| Ube2d3   | 5,62E-67  | 0,48222512 | 7,00E-63  | 0 |
| Dusp1    | 1,55E-66  | 0,64710284 | 1,94E-62  | 0 |
| Mefv     | 2,54E-66  | 0,4767065  | 3,17E-62  | 0 |
| Phlda1   | 5,28E-66  | 0,69268059 | 6,57E-62  | 0 |
| Samhd1   | 6,61E-66  | 0,75928628 | 8,23E-62  | 0 |
| Rps15a   | 4,07E-65  | 0,31982794 | 5,07E-61  | 0 |
| Rpl10    | 8,23E-65  | 0,27559317 | 1,02E-60  | 0 |
| Ifngr1   | 8,93E-65  | 0,59747211 | 1,11E-60  | 0 |
| Csf2ra   | 9,36E-65  | 0,58465186 | 1,17E-60  | 0 |
| Slc25a5  | 2,27E-64  | 0,42008071 | 2,82E-60  | 0 |
| Nfkbia   | 3,11E-64  | 0,83604367 | 3,87E-60  | 0 |

|         |          |            |          |   |
|---------|----------|------------|----------|---|
| Eif4a1  | 5,19E-64 | 0,44661288 | 6,46E-60 | 0 |
| Arpc3   | 1,29E-62 | 0,40192948 | 1,60E-58 | 0 |
| Glipr2  | 1,91E-62 | 0,53107888 | 2,38E-58 | 0 |
| Serp1   | 2,15E-62 | 0,56430035 | 2,68E-58 | 0 |
| Runx3   | 2,47E-62 | 0,5150691  | 3,08E-58 | 0 |
| Rpl34   | 7,91E-62 | 0,29696075 | 9,85E-58 | 0 |
| Adora2b | 8,45E-62 | 0,55766177 | 1,05E-57 | 0 |
| Rpl17   | 7,51E-61 | 0,30263823 | 9,34E-57 | 0 |
| Zfp36   | 7,54E-61 | 0,53955863 | 9,38E-57 | 0 |
| Rps3    | 1,45E-60 | 0,27660085 | 1,81E-56 | 0 |
| Sec61b  | 3,68E-60 | 0,45622496 | 4,58E-56 | 0 |
| Rps18   | 1,45E-59 | 0,26398197 | 1,81E-55 | 0 |
| Adssl1  | 4,80E-59 | 0,59777933 | 5,98E-55 | 0 |
| Cfp     | 9,28E-59 | 0,59436949 | 1,15E-54 | 0 |
| Rpsa    | 3,91E-58 | 0,36666435 | 4,87E-54 | 0 |
| Slc15a3 | 4,11E-58 | 0,5664899  | 5,11E-54 | 0 |
| Gm9844  | 6,63E-58 | 0,55242677 | 8,25E-54 | 0 |
| Flot1   | 9,35E-58 | 0,55345863 | 1,16E-53 | 0 |
| Gpr132  | 1,58E-57 | 0,52898824 | 1,96E-53 | 0 |
| Mxd1    | 1,21E-56 | 0,54903892 | 1,51E-52 | 0 |
| Aprt    | 2,32E-56 | 0,52017741 | 2,88E-52 | 0 |
| Ccrl2   | 1,24E-55 | 0,93787623 | 1,55E-51 | 0 |
| Uba52   | 7,34E-55 | 0,48224346 | 9,13E-51 | 0 |
| Gsr     | 3,15E-54 | 0,53503861 | 3,92E-50 | 0 |
| Mrpl52  | 4,22E-54 | 0,45052689 | 5,25E-50 | 0 |
| Ptpn1   | 4,47E-54 | 0,64144471 | 5,56E-50 | 0 |
| Capza2  | 5,82E-54 | 0,42940314 | 7,25E-50 | 0 |
| Ifi204  | 6,57E-54 | 0,64290004 | 8,17E-50 | 0 |
| Rpl15   | 8,23E-54 | 0,30816452 | 1,02E-49 | 0 |
| Slc16a3 | 1,10E-53 | 0,61261308 | 1,37E-49 | 0 |
| Skap2   | 1,24E-53 | 0,52244671 | 1,54E-49 | 0 |
| Anxa2   | 1,58E-53 | 0,34909261 | 1,97E-49 | 0 |
| Rac2    | 4,61E-53 | 0,55009201 | 5,74E-49 | 0 |
| Myl12a  | 5,49E-53 | 0,4365848  | 6,83E-49 | 0 |
| Cd14    | 8,26E-53 | 1,03106394 | 1,03E-48 | 0 |
| Tgif1   | 8,89E-52 | 0,60333281 | 1,11E-47 | 0 |
| Esd     | 1,16E-51 | 0,544419   | 1,45E-47 | 0 |
| Ms4a6b  | 3,46E-51 | 0,58579515 | 4,31E-47 | 0 |
| Gapdh   | 7,82E-51 | 0,39296062 | 9,73E-47 | 0 |
| Cdk2ap2 | 2,88E-50 | 0,59622096 | 3,58E-46 | 0 |
| Cdkn1a  | 8,13E-50 | 0,55140824 | 1,01E-45 | 0 |
| Clec4a1 | 2,06E-49 | 0,50098913 | 2,56E-45 | 0 |
| Pde4b   | 5,84E-49 | 0,50730144 | 7,27E-45 | 0 |
| Mmp19   | 8,77E-49 | 0,48394094 | 1,09E-44 | 0 |
| Clec4n  | 1,32E-48 | 0,56322654 | 1,64E-44 | 0 |
| Rpl19   | 2,38E-48 | 0,25977629 | 2,96E-44 | 0 |
| Hnrnpa3 | 3,98E-48 | 0,43793174 | 4,96E-44 | 0 |
| Mpeg1   | 4,79E-48 | 0,48491275 | 5,96E-44 | 0 |
| Rpl27a  | 3,81E-46 | 0,26881741 | 4,74E-42 | 0 |
| Pirb    | 1,32E-45 | 0,54455039 | 1,65E-41 | 0 |
| Rpl36a1 | 1,72E-45 | 0,37723784 | 2,14E-41 | 0 |
| Socs3   | 2,77E-45 | 0,58909724 | 3,44E-41 | 0 |
| Jarid2  | 3,73E-44 | 0,5127162  | 4,64E-40 | 0 |
| Hcls1   | 6,66E-44 | 0,46425666 | 8,29E-40 | 0 |
| Csf2rb  | 1,03E-43 | 0,4867781  | 1,28E-39 | 0 |
| Lrrfip1 | 1,52E-43 | 0,54884455 | 1,90E-39 | 0 |
| Rpl24   | 1,80E-43 | 0,26507138 | 2,24E-39 | 0 |
| Ccr1    | 3,48E-43 | 0,57833642 | 4,33E-39 | 0 |
| Gm6377  | 5,67E-43 | 0,51317339 | 7,05E-39 | 0 |
| Sub1    | 4,09E-42 | 0,32800382 | 5,09E-38 | 0 |
| Nfe2l2  | 6,87E-42 | 0,58272648 | 8,55E-38 | 0 |
| Evl     | 7,43E-42 | 0,45281001 | 9,24E-38 | 0 |
| Shisa5  | 5,00E-41 | 0,37332051 | 6,22E-37 | 0 |
| Sys1    | 1,70E-40 | 0,46063247 | 2,12E-36 | 0 |
| Btf3    | 2,54E-40 | 0,3042485  | 3,16E-36 | 0 |
| Lsp1    | 3,22E-40 | 0,4277112  | 4,01E-36 | 0 |
| Hck     | 4,90E-40 | 0,47925177 | 6,10E-36 | 0 |
| Smpdl3a | 5,34E-40 | 0,62880618 | 6,64E-36 | 0 |
| Id2     | 1,00E-39 | 0,53815076 | 1,25E-35 | 0 |
| Capzb   | 3,16E-39 | 0,33413138 | 3,94E-35 | 0 |
| Btg2    | 4,05E-39 | 0,42450629 | 5,05E-35 | 0 |

|          |          |            |          |   |
|----------|----------|------------|----------|---|
| Glrx     | 4,37E-39 | 0,51123595 | 5,43E-35 | 0 |
| Smim3    | 8,12E-39 | 0,42924708 | 1,01E-34 | 0 |
| Nr4a2    | 1,97E-38 | 0,51070238 | 2,45E-34 | 0 |
| Arpc4    | 2,08E-38 | 0,38814614 | 2,58E-34 | 0 |
| Mrpl33   | 2,58E-38 | 0,4146554  | 3,21E-34 | 0 |
| Cnn2     | 4,26E-38 | 0,4057407  | 5,30E-34 | 0 |
| Tmem167  | 7,60E-38 | 0,46775584 | 9,46E-34 | 0 |
| Cotl1    | 1,20E-37 | 0,33471942 | 1,49E-33 | 0 |
| Kdm6b    | 1,29E-37 | 0,53430119 | 1,61E-33 | 0 |
| Myl12b   | 3,79E-37 | 0,44471806 | 4,71E-33 | 0 |
| Cxcl2    | 5,00E-37 | 0,93530553 | 6,22E-33 | 0 |
| Gm21188  | 3,30E-36 | 0,44112351 | 4,11E-32 | 0 |
| Srsf5    | 1,09E-35 | 0,41403662 | 1,35E-31 | 0 |
| Nr4a1    | 5,06E-35 | 0,57420296 | 6,29E-31 | 0 |
| Arf1     | 1,74E-34 | 0,3713162  | 2,17E-30 | 0 |
| Pgk1     | 5,66E-34 | 0,39007781 | 7,04E-30 | 0 |
| Ctsc     | 7,83E-34 | 0,40396772 | 9,75E-30 | 0 |
| Por      | 8,52E-34 | 0,45419533 | 1,06E-29 | 0 |
| Hnrnpdl  | 2,66E-33 | 0,41000679 | 3,31E-29 | 0 |
| Mgst1    | 3,55E-33 | 0,53033562 | 4,42E-29 | 0 |
| Rpl27    | 5,64E-33 | 0,27443327 | 7,02E-29 | 0 |
| Ncf2     | 1,03E-32 | 0,42664003 | 1,29E-28 | 0 |
| Ppp1r15a | 1,21E-32 | 0,44871147 | 1,51E-28 | 0 |
| Irf5     | 1,52E-32 | 0,42762144 | 1,89E-28 | 0 |
| Chmp4b   | 3,23E-32 | 0,40059858 | 4,02E-28 | 0 |
| Cd300c2  | 3,55E-32 | 0,43420737 | 4,42E-28 | 0 |
| Ldha     | 8,15E-32 | 0,34986164 | 1,01E-27 | 0 |
| Pold4    | 8,93E-32 | 0,45133897 | 1,11E-27 | 0 |
| Tspo     | 9,92E-32 | 0,27870888 | 1,23E-27 | 0 |
| Rbm39    | 1,21E-31 | 0,34220916 | 1,51E-27 | 0 |
| Clic1    | 1,30E-31 | 0,28334268 | 1,62E-27 | 0 |
| Psmb8    | 2,30E-31 | 0,38322786 | 2,87E-27 | 0 |
| Tpst2    | 2,37E-31 | 0,41641062 | 2,95E-27 | 0 |
| Gda      | 2,63E-31 | 0,44945562 | 3,28E-27 | 0 |
| Ube2n    | 3,39E-31 | 0,38326934 | 4,22E-27 | 0 |
| Eif3k    | 4,09E-31 | 0,34581233 | 5,09E-27 | 0 |
| Fam107b  | 4,73E-31 | 0,37017012 | 5,89E-27 | 0 |
| Fosl2    | 5,11E-31 | 0,42544939 | 6,36E-27 | 0 |
| Eif3f    | 7,20E-31 | 0,35874487 | 8,96E-27 | 0 |
| Atf3     | 8,23E-31 | 0,51901663 | 1,02E-26 | 0 |
| Eif5a    | 8,52E-31 | 0,30155875 | 1,06E-26 | 0 |
| St3gal4  | 8,94E-31 | 0,38745917 | 1,11E-26 | 0 |
| Ccl9     | 1,17E-30 | 0,38855324 | 1,46E-26 | 0 |
| Limd2    | 1,25E-30 | 0,37164426 | 1,55E-26 | 0 |
| Ifngr2   | 2,03E-30 | 0,41228067 | 2,53E-26 | 0 |
| Vasp     | 4,59E-30 | 0,43795599 | 5,72E-26 | 0 |
| Rgs2     | 5,05E-30 | 0,56317492 | 6,29E-26 | 0 |
| Ptprc    | 1,16E-29 | 0,39511483 | 1,45E-25 | 0 |
| Ifrd1    | 1,77E-29 | 0,64119432 | 2,20E-25 | 0 |
| Gm11808  | 1,81E-29 | 0,37152679 | 2,26E-25 | 0 |
| Ucp2     | 5,19E-29 | 0,3422678  | 6,46E-25 | 0 |
| Lman2    | 6,78E-29 | 0,37705811 | 8,43E-25 | 0 |
| Ppp4c    | 9,66E-29 | 0,38020967 | 1,20E-24 | 0 |
| Plin2    | 3,78E-28 | 0,35932647 | 4,71E-24 | 0 |
| Jun      | 5,33E-28 | 0,4954287  | 6,63E-24 | 0 |
| Pycard   | 6,84E-28 | 0,41314288 | 8,51E-24 | 0 |
| Myd88    | 1,23E-27 | 0,36400193 | 1,53E-23 | 0 |
| Actb     | 1,45E-27 | 0,37607872 | 1,81E-23 | 0 |
| Coro1b   | 2,39E-27 | 0,41326537 | 2,97E-23 | 0 |
| Selplg   | 3,92E-27 | 0,34725285 | 4,87E-23 | 0 |
| Alas1    | 4,37E-27 | 0,42984682 | 5,44E-23 | 0 |
| Fyb      | 4,45E-27 | 0,43605078 | 5,54E-23 | 0 |
| Cope     | 1,04E-26 | 0,36821397 | 1,29E-22 | 0 |
| Snx1     | 1,06E-26 | 0,39265997 | 1,32E-22 | 0 |
| H2afy    | 1,82E-26 | 0,38761766 | 2,27E-22 | 0 |
| Casp6    | 2,57E-26 | 0,50082779 | 3,20E-22 | 0 |
| Tmbim6   | 6,42E-26 | 0,27095475 | 7,99E-22 | 0 |
| Il1rn    | 1,13E-25 | 0,35794223 | 1,41E-21 | 0 |
| Ubc      | 1,44E-25 | 0,38180092 | 1,79E-21 | 0 |
| H2-DMb1  | 1,65E-25 | 0,38126787 | 2,05E-21 | 0 |
| Litaf    | 2,23E-25 | 0,40643603 | 2,78E-21 | 0 |

|             |          |            |          |   |
|-------------|----------|------------|----------|---|
| Erp44       | 2,39E-25 | 0,37182632 | 2,98E-21 | 0 |
| Ndel1       | 3,82E-25 | 0,40717809 | 4,76E-21 | 0 |
| D8Erttd738e | 5,48E-25 | 0,32555714 | 6,82E-21 | 0 |
| Psm1        | 6,92E-25 | 0,32449631 | 8,61E-21 | 0 |
| Kdm7a       | 2,26E-24 | 0,36650624 | 2,81E-20 | 0 |
| Lyn         | 2,32E-24 | 0,35565273 | 2,88E-20 | 0 |
| Il18        | 3,58E-24 | 0,35788128 | 4,46E-20 | 0 |
| Hnrnpk      | 5,07E-24 | 0,27842073 | 6,31E-20 | 0 |
| Rps27rt     | 6,89E-24 | 0,28816949 | 8,58E-20 | 0 |
| Rnpep       | 9,32E-24 | 0,39264918 | 1,16E-19 | 0 |
| Tma7        | 1,35E-23 | 0,28622269 | 1,68E-19 | 0 |
| Eif3h       | 1,45E-23 | 0,31995686 | 1,80E-19 | 0 |
| Milr1       | 1,56E-23 | 0,35547184 | 1,94E-19 | 0 |
| Gadd45b     | 1,64E-23 | 0,46579386 | 2,04E-19 | 0 |
| Cd300a      | 2,55E-23 | 0,3892867  | 3,17E-19 | 0 |
| Rab32       | 3,00E-23 | 0,38238795 | 3,73E-19 | 0 |
| Map2k3      | 3,23E-23 | 0,4210835  | 4,02E-19 | 0 |
| Lilr4b      | 3,53E-23 | 0,32527539 | 4,39E-19 | 0 |
| Chd7        | 4,01E-23 | 0,36289433 | 4,99E-19 | 0 |
| Tmed5       | 5,15E-23 | 0,38392801 | 6,41E-19 | 0 |
| Gnb2        | 6,40E-23 | 0,26699341 | 7,97E-19 | 0 |
| Pid1        | 6,84E-23 | 0,31523459 | 8,52E-19 | 0 |
| H13         | 7,62E-23 | 0,33470984 | 9,48E-19 | 0 |
| Arf5        | 1,30E-22 | 0,2940256  | 1,62E-18 | 0 |
| Sp100       | 2,37E-22 | 0,36836431 | 2,95E-18 | 0 |
| Sfn5        | 3,93E-22 | 0,38080661 | 4,90E-18 | 0 |
| Ptpn6       | 4,01E-22 | 0,34337732 | 4,99E-18 | 0 |
| Gm9843      | 4,98E-22 | 0,28388329 | 6,20E-18 | 0 |
| Pstpip1     | 6,73E-22 | 0,33715093 | 8,38E-18 | 0 |
| Pitpna      | 7,64E-22 | 0,27905672 | 9,51E-18 | 0 |
| Psm7        | 9,97E-22 | 0,27122499 | 1,24E-17 | 0 |
| Traf1       | 1,31E-21 | 0,33269082 | 1,63E-17 | 0 |
| Psme1       | 1,66E-21 | 0,34478619 | 2,06E-17 | 0 |
| Cisd2       | 2,21E-21 | 0,34450034 | 2,75E-17 | 0 |
| Trps1       | 2,99E-21 | 0,35551265 | 3,73E-17 | 0 |
| Hpcal1      | 3,15E-21 | 0,35606321 | 3,92E-17 | 0 |
| Pilra       | 3,87E-21 | 0,35077833 | 4,81E-17 | 0 |
| Spcs2       | 3,97E-21 | 0,32783719 | 4,94E-17 | 0 |
| Itgb2       | 5,18E-21 | 0,3111294  | 6,44E-17 | 0 |
| Atp5f1      | 6,42E-21 | 0,25420077 | 7,99E-17 | 0 |
| Tgfb1       | 6,97E-21 | 0,3883134  | 8,67E-17 | 0 |
| Ndufa3      | 1,13E-20 | 0,2769331  | 1,41E-16 | 0 |
| Ssr2        | 1,15E-20 | 0,3537116  | 1,43E-16 | 0 |
| Atp5c1      | 1,24E-20 | 0,26936223 | 1,54E-16 | 0 |
| Birc3       | 1,34E-20 | 0,31592645 | 1,67E-16 | 0 |
| Ccl2        | 2,88E-20 | 0,66690517 | 3,58E-16 | 0 |
| Agpat4      | 2,91E-20 | 0,35469239 | 3,63E-16 | 0 |
| Gcsh        | 3,15E-20 | 0,41700021 | 3,92E-16 | 0 |
| Ccnl1       | 3,32E-20 | 0,42055166 | 4,13E-16 | 0 |
| Cdkn2d      | 6,02E-20 | 0,37182776 | 7,49E-16 | 0 |
| Sf3b1       | 9,86E-20 | 0,3218083  | 1,23E-15 | 0 |
| Hmgcl       | 1,55E-19 | 0,35607679 | 1,93E-15 | 0 |
| Srsf3       | 1,85E-19 | 0,26781216 | 2,30E-15 | 0 |
| Tpm4        | 2,09E-19 | 0,35377952 | 2,60E-15 | 0 |
| Scand1      | 2,55E-19 | 0,31712338 | 3,18E-15 | 0 |
| Tmem258     | 6,16E-19 | 0,29406271 | 7,67E-15 | 0 |
| Zeb2        | 7,75E-19 | 0,29596398 | 9,64E-15 | 0 |
| Plek        | 7,83E-19 | 0,3553954  | 9,74E-15 | 0 |
| Pxk         | 9,97E-19 | 0,28728165 | 1,24E-14 | 0 |
| Gdi2        | 1,58E-18 | 0,26169588 | 1,96E-14 | 0 |
| Dennd4a     | 2,04E-18 | 0,36894644 | 2,53E-14 | 0 |
| Gmfg        | 2,74E-18 | 0,27086053 | 3,41E-14 | 0 |
| Cd86        | 3,24E-18 | 0,31704016 | 4,03E-14 | 0 |
| D1Erttd622e | 5,14E-18 | 0,30278833 | 6,40E-14 | 0 |
| Il17ra      | 7,14E-18 | 0,29180336 | 8,88E-14 | 0 |
| Trib1       | 7,15E-18 | 0,30172703 | 8,90E-14 | 0 |
| Rgcc        | 1,67E-17 | 0,38089733 | 2,08E-13 | 0 |
| Tor1a       | 1,85E-17 | 0,32730054 | 2,31E-13 | 0 |
| Vmp1        | 2,55E-17 | 0,33547356 | 3,18E-13 | 0 |
| Tnfrsf1a    | 3,23E-17 | 0,33248158 | 4,02E-13 | 0 |
| Manf        | 4,16E-17 | 0,37346187 | 5,17E-13 | 0 |

|          |           |            |            |   |
|----------|-----------|------------|------------|---|
| Aif1     | 4,44E-17  | 0,33678467 | 5,52E-13   | 0 |
| Picalm   | 4,64E-17  | 0,33554535 | 5,77E-13   | 0 |
| Gadd45g  | 4,72E-17  | 0,33004765 | 5,88E-13   | 0 |
| Fermt3   | 9,62E-17  | 0,30588557 | 1,20E-12   | 0 |
| Sde2     | 1,07E-16  | 0,31931534 | 1,33E-12   | 0 |
| Xbp1     | 1,12E-16  | 0,31453873 | 1,39E-12   | 0 |
| Mcub     | 1,38E-16  | 0,28549703 | 1,72E-12   | 0 |
| Ddx39    | 2,34E-16  | 0,28706494 | 2,91E-12   | 0 |
| Emd      | 2,72E-16  | 0,33802751 | 3,39E-12   | 0 |
| Tmed2    | 3,28E-16  | 0,29462053 | 4,08E-12   | 0 |
| Sbno2    | 7,08E-16  | 0,28358419 | 8,82E-12   | 0 |
| Zyx      | 7,87E-16  | 0,2961535  | 9,79E-12   | 0 |
| Hebp1    | 9,19E-16  | 0,29846313 | 1,14E-11   | 0 |
| B4galnt1 | 1,01E-15  | 0,29132377 | 1,26E-11   | 0 |
| Sf3b6    | 1,44E-15  | 0,2576559  | 1,79E-11   | 0 |
| Aldoa    | 2,41E-15  | 0,25762744 | 2,99E-11   | 0 |
| Ccdc12   | 2,58E-15  | 0,26761164 | 3,22E-11   | 0 |
| Psmb9    | 3,35E-15  | 0,2721028  | 4,17E-11   | 0 |
| Tm6sf1   | 3,35E-15  | 0,25791965 | 4,17E-11   | 0 |
| Rhog     | 3,85E-15  | 0,30931092 | 4,79E-11   | 0 |
| Nop53    | 4,13E-15  | 0,26309413 | 5,14E-11   | 0 |
| Ifnar2   | 4,14E-15  | 0,30172103 | 5,15E-11   | 0 |
| Fis1     | 4,80E-15  | 0,26916203 | 5,98E-11   | 0 |
| Tgm2     | 5,33E-15  | 0,37023244 | 6,64E-11   | 0 |
| Hspa5    | 5,74E-15  | 0,27741328 | 7,14E-11   | 0 |
| Psme2    | 1,32E-14  | 0,27970967 | 1,64E-10   | 0 |
| Eif2s3y  | 1,48E-14  | 0,28206944 | 1,84E-10   | 0 |
| Iscu     | 2,24E-14  | 0,28415179 | 2,79E-10   | 0 |
| Tor1aip1 | 2,42E-14  | 0,29471155 | 3,02E-10   | 0 |
| Pdia6    | 2,93E-14  | 0,27478302 | 3,64E-10   | 0 |
| Psmb10   | 4,42E-14  | 0,30815476 | 5,50E-10   | 0 |
| Fes      | 4,96E-14  | 0,28752184 | 6,18E-10   | 0 |
| Uqcrc1   | 1,48E-13  | 0,25004241 | 1,84E-09   | 0 |
| Vamp4    | 1,53E-13  | 0,28068088 | 1,91E-09   | 0 |
| Ppt1     | 1,91E-13  | 0,28901607 | 2,38E-09   | 0 |
| Smim4    | 2,12E-13  | 0,27425176 | 2,63E-09   | 0 |
| Ube2l3   | 2,68E-13  | 0,26045901 | 3,33E-09   | 0 |
| Nmi      | 2,73E-13  | 0,26625048 | 3,40E-09   | 0 |
| Gsdmd    | 3,16E-13  | 0,27382397 | 3,94E-09   | 0 |
| Tmem14c  | 3,55E-13  | 0,26534547 | 4,41E-09   | 0 |
| Ankrd11  | 3,67E-13  | 0,26639044 | 4,57E-09   | 0 |
| Ccnd3    | 4,58E-13  | 0,2595182  | 5,70E-09   | 0 |
| Pira2    | 4,70E-13  | 0,26001283 | 5,85E-09   | 0 |
| Fam49b   | 1,57E-12  | 0,27287414 | 1,95E-08   | 0 |
| Sod2     | 1,70E-12  | 0,31544453 | 2,11E-08   | 0 |
| Lrp10    | 2,72E-12  | 0,27891765 | 3,39E-08   | 0 |
| Tkt      | 3,56E-12  | 0,25126506 | 4,43E-08   | 0 |
| Tram1    | 3,86E-12  | 0,2541575  | 4,81E-08   | 0 |
| Nfkbib   | 1,53E-11  | 0,28710966 | 1,90E-07   | 0 |
| Nfkbiz   | 4,86E-11  | 0,26350587 | 6,05E-07   | 0 |
| Bak1     | 6,61E-11  | 0,25351903 | 8,23E-07   | 0 |
| Nrros    | 2,15E-10  | 0,25389834 | 2,68E-06   | 0 |
| Twf2     | 3,18E-10  | 0,25536924 | 3,96E-06   | 0 |
| C5ar1    | 1,65E-05  | 0,25328462 | 0,20564272 | 0 |
| Ccl3     | 6,45E-05  | 0,35887024 | 0,80255921 | 0 |
| Vsig4    | 0         | 2,57975987 | 0          | 1 |
| Sparc    | 0         | 2,44633589 | 0          | 1 |
| Hexb     | 0         | 1,73963266 | 0          | 1 |
| S100b    | 0         | 1,66852685 | 0          | 1 |
| TdTomato | 0         | 1,66117395 | 0          | 1 |
| Olfml3   | 0         | 1,65598831 | 0          | 1 |
| Pmepa1   | 0         | 1,49806539 | 0          | 1 |
| Ctsd     | 2,08E-299 | 2,13877297 | 2,58E-295  | 1 |
| Trem2    | 2,39E-269 | 1,26540214 | 2,97E-265  | 1 |
| Syng1    | 1,25E-268 | 1,31704448 | 1,56E-264  | 1 |
| C1qa     | 2,16E-251 | 1,19077331 | 2,68E-247  | 1 |
| Timp2    | 4,65E-247 | 1,29663977 | 5,78E-243  | 1 |
| Ltc4s    | 4,15E-238 | 1,25304323 | 5,17E-234  | 1 |
| Arsb     | 1,19E-237 | 1,09673445 | 1,48E-233  | 1 |
| Cx3cr1   | 2,68E-237 | 1,17776964 | 3,33E-233  | 1 |
| Cst3     | 1,41E-230 | 0,91376878 | 1,75E-226  | 1 |

|          |           |            |           |   |
|----------|-----------|------------|-----------|---|
| C1qc     | 4,50E-230 | 1,15137878 | 5,60E-226 | 1 |
| Camk1    | 4,64E-225 | 1,15031329 | 5,78E-221 | 1 |
| C1qb     | 1,74E-224 | 1,07154631 | 2,17E-220 | 1 |
| Gpr34    | 4,28E-222 | 1,14003696 | 5,33E-218 | 1 |
| Folr2    | 1,30E-221 | 1,16654263 | 1,62E-217 | 1 |
| Grn      | 1,09E-217 | 0,93735778 | 1,36E-213 | 1 |
| Ecsr     | 1,55E-211 | 0,83845546 | 1,93E-207 | 1 |
| Tmem37   | 1,79E-207 | 1,10181281 | 2,22E-203 | 1 |
| Bin1     | 1,06E-206 | 1,09882457 | 1,31E-202 | 1 |
| Pltp     | 1,40E-203 | 1,02959922 | 1,74E-199 | 1 |
| Cbr2     | 3,98E-203 | 1,12956789 | 4,95E-199 | 1 |
| Bcl2a1b  | 8,01E-194 | 1,15114139 | 9,97E-190 | 1 |
| Lair1    | 5,20E-173 | 0,93817745 | 6,47E-169 | 1 |
| Anxa3    | 4,34E-169 | 0,97181259 | 5,40E-165 | 1 |
| Rnase4   | 3,32E-166 | 0,91163896 | 4,13E-162 | 1 |
| Tmem86a  | 4,95E-166 | 0,90306815 | 6,16E-162 | 1 |
| Pmp22    | 6,68E-154 | 0,85763834 | 8,31E-150 | 1 |
| Itm2b    | 1,31E-148 | 0,64141401 | 1,63E-144 | 1 |
| Pla2g16  | 4,35E-145 | 0,78674529 | 5,42E-141 | 1 |
| Ctsb     | 9,72E-141 | 0,66077647 | 1,21E-136 | 1 |
| Serpnb6a | 2,97E-138 | 0,78464532 | 3,69E-134 | 1 |
| Cfh      | 1,34E-136 | 0,74273505 | 1,66E-132 | 1 |
| Ly86     | 6,05E-136 | 0,84747989 | 7,53E-132 | 1 |
| Ctss     | 7,39E-136 | 0,47293555 | 9,20E-132 | 1 |
| Itgb5    | 2,57E-128 | 0,79662678 | 3,19E-124 | 1 |
| Hpgd     | 4,77E-127 | 0,84652135 | 5,94E-123 | 1 |
| Ctla2a   | 7,06E-127 | 0,70765941 | 8,78E-123 | 1 |
| St3gal5  | 5,32E-125 | 0,67544723 | 6,62E-121 | 1 |
| Cd9      | 4,57E-123 | 0,68975346 | 5,69E-119 | 1 |
| Chst1    | 2,29E-121 | 0,57832746 | 2,85E-117 | 1 |
| F11r     | 1,29E-120 | 0,80043889 | 1,61E-116 | 1 |
| Tbxas1   | 1,22E-119 | 0,72823407 | 1,52E-115 | 1 |
| Csf1r    | 2,36E-119 | 0,61384881 | 2,93E-115 | 1 |
| Cspg4    | 3,50E-119 | 0,66638275 | 4,36E-115 | 1 |
| Nfic     | 7,63E-119 | 0,77070137 | 9,50E-115 | 1 |
| Slc9a3r2 | 1,62E-116 | 0,70566078 | 2,01E-112 | 1 |
| Man2b1   | 1,15E-115 | 0,75923674 | 1,44E-111 | 1 |
| Emp3     | 2,40E-115 | 0,5578349  | 2,98E-111 | 1 |
| C3ar1    | 3,22E-115 | 0,73396551 | 4,01E-111 | 1 |
| Nupr1    | 3,27E-114 | 1,01334447 | 4,07E-110 | 1 |
| Adgre5   | 4,67E-111 | 0,74277635 | 5,81E-107 | 1 |
| Fabp3    | 7,29E-111 | 0,53991499 | 9,07E-107 | 1 |
| Fcna     | 1,86E-110 | 0,672964   | 2,31E-106 | 1 |
| Lyz2     | 8,05E-109 | 0,66876317 | 1,00E-104 | 1 |
| Serpine1 | 1,78E-108 | 0,83426948 | 2,22E-104 | 1 |
| Smim14   | 1,01E-107 | 0,69653822 | 1,26E-103 | 1 |
| Wfdc17   | 3,07E-107 | 1,09856015 | 3,81E-103 | 1 |
| Cd37     | 5,13E-107 | 0,75155139 | 6,39E-103 | 1 |
| Slc2a6   | 6,04E-107 | 0,6266112  | 7,51E-103 | 1 |
| Fcgrt    | 1,11E-106 | 0,63594556 | 1,38E-102 | 1 |
| Cd63     | 2,72E-105 | 0,60107635 | 3,39E-101 | 1 |
| Tmsb4x   | 2,34E-101 | 0,28858405 | 2,92E-97  | 1 |
| Dhrs3    | 1,80E-100 | 0,67135354 | 2,24E-96  | 1 |
| Ninj1    | 8,90E-99  | 0,62946537 | 1,11E-94  | 1 |
| Rhoc     | 2,22E-98  | 0,70104197 | 2,76E-94  | 1 |
| Hexa     | 2,46E-98  | 0,62571266 | 3,06E-94  | 1 |
| Lyve1    | 6,46E-98  | 0,73441915 | 8,05E-94  | 1 |
| Hpgds    | 2,19E-96  | 0,61211622 | 2,72E-92  | 1 |
| Ecm1     | 2,25E-95  | 0,59221589 | 2,80E-91  | 1 |
| Mgst1    | 2,68E-94  | 0,6407535  | 3,34E-90  | 1 |
| Selenom  | 2,40E-92  | 0,61150449 | 2,99E-88  | 1 |
| Cd40     | 1,27E-91  | 0,59038356 | 1,58E-87  | 1 |
| Sulf2    | 5,13E-91  | 0,63635999 | 6,39E-87  | 1 |
| Tcim     | 5,91E-91  | 0,56533889 | 7,36E-87  | 1 |
| Klf2     | 8,20E-91  | 0,7477301  | 1,02E-86  | 1 |
| Lyz1     | 1,16E-90  | 1,07463759 | 1,45E-86  | 1 |
| Rgs10    | 1,58E-90  | 0,54547527 | 1,96E-86  | 1 |
| Apoe     | 3,78E-86  | 1,35991409 | 4,71E-82  | 1 |
| Slco2b1  | 9,41E-86  | 0,56615956 | 1,17E-81  | 1 |
| Tns1     | 6,53E-85  | 0,58442294 | 8,13E-81  | 1 |
| Cebpz    | 1,48E-83  | 0,59353561 | 1,84E-79  | 1 |

|               |          |            |          |   |
|---------------|----------|------------|----------|---|
| Selenop       | 4,00E-83 | 0,3781036  | 4,98E-79 | 1 |
| Sigmar1       | 6,61E-79 | 0,62824466 | 8,23E-75 | 1 |
| Serinc3       | 1,95E-78 | 0,48490028 | 2,43E-74 | 1 |
| Lamp1         | 2,70E-78 | 0,55383875 | 3,36E-74 | 1 |
| Mef2a         | 3,46E-77 | 0,58370369 | 4,31E-73 | 1 |
| Stab1         | 5,26E-77 | 0,54311748 | 6,54E-73 | 1 |
| Lpcat2        | 9,51E-77 | 0,59996908 | 1,18E-72 | 1 |
| Mtus1         | 2,52E-76 | 0,50215214 | 3,14E-72 | 1 |
| Ftl1          | 3,86E-76 | 0,31492139 | 4,80E-72 | 1 |
| Comt          | 2,48E-75 | 0,61102421 | 3,09E-71 | 1 |
| S1pr1         | 2,74E-75 | 0,51876306 | 3,41E-71 | 1 |
| Lgmn          | 2,17E-74 | 0,43396564 | 2,70E-70 | 1 |
| Ophn1         | 8,74E-74 | 0,49543936 | 1,09E-69 | 1 |
| Pepd          | 1,10E-73 | 0,51394201 | 1,36E-69 | 1 |
| 2510009E07Rik | 6,02E-73 | 0,46176553 | 7,49E-69 | 1 |
| Pald1         | 1,59E-72 | 0,41855345 | 1,98E-68 | 1 |
| Timd4         | 2,94E-72 | 0,51963145 | 3,66E-68 | 1 |
| Fth1          | 4,14E-72 | 0,30343281 | 5,15E-68 | 1 |
| Gas6          | 1,17E-71 | 0,42540475 | 1,45E-67 | 1 |
| Tuba1a        | 1,50E-71 | 0,58347741 | 1,87E-67 | 1 |
| Enpp1         | 1,02E-70 | 0,42347059 | 1,27E-66 | 1 |
| Sh3bp5        | 1,44E-70 | 0,53957208 | 1,79E-66 | 1 |
| Lrp1          | 1,85E-70 | 0,57333792 | 2,30E-66 | 1 |
| Cd83          | 4,18E-70 | 0,72867572 | 5,20E-66 | 1 |
| Nfia          | 2,06E-68 | 0,54663241 | 2,57E-64 | 1 |
| Sat1          | 1,19E-66 | 0,42407024 | 1,47E-62 | 1 |
| Scoc          | 1,64E-66 | 0,53642587 | 2,04E-62 | 1 |
| Rhob          | 6,26E-66 | 0,5532128  | 7,79E-62 | 1 |
| Abhd12        | 9,57E-66 | 0,54236962 | 1,19E-61 | 1 |
| B2m           | 1,03E-65 | 0,29903543 | 1,28E-61 | 1 |
| Nrp1          | 1,99E-65 | 0,4920115  | 2,48E-61 | 1 |
| Tspan3        | 2,04E-65 | 0,5473861  | 2,54E-61 | 1 |
| Sgk1          | 2,12E-63 | 0,56940102 | 2,64E-59 | 1 |
| Lamp2         | 3,75E-63 | 0,44902768 | 4,67E-59 | 1 |
| Ahnak2        | 4,01E-63 | 0,52560246 | 4,99E-59 | 1 |
| Adgre1        | 4,58E-63 | 0,52068056 | 5,70E-59 | 1 |
| Pon2          | 8,72E-62 | 0,52605913 | 1,09E-57 | 1 |
| Cd68          | 1,78E-61 | 0,53038518 | 2,21E-57 | 1 |
| Maf           | 2,97E-61 | 0,42667252 | 3,69E-57 | 1 |
| Mob2          | 3,06E-61 | 0,5033508  | 3,81E-57 | 1 |
| Tnfsf12       | 3,28E-61 | 0,52528324 | 4,09E-57 | 1 |
| Gpx1          | 3,58E-61 | 0,37382158 | 4,46E-57 | 1 |
| Fermt2        | 4,09E-61 | 0,39580372 | 5,09E-57 | 1 |
| C4b           | 1,06E-60 | 0,473252   | 1,32E-56 | 1 |
| Rasgrp3       | 1,38E-59 | 0,46049941 | 1,72E-55 | 1 |
| Rin2          | 5,20E-59 | 0,47946192 | 6,48E-55 | 1 |
| Tcn2          | 7,38E-59 | 0,50648722 | 9,19E-55 | 1 |
| Ncf1          | 4,30E-58 | 0,4885321  | 5,35E-54 | 1 |
| Adam15        | 1,12E-57 | 0,52189162 | 1,40E-53 | 1 |
| Clec12a       | 2,59E-57 | 0,4902774  | 3,22E-53 | 1 |
| Ang           | 3,19E-57 | 0,47116947 | 3,98E-53 | 1 |
| Cc2d1b        | 3,21E-57 | 0,42186702 | 4,00E-53 | 1 |
| Tpp1          | 1,02E-56 | 0,49506518 | 1,26E-52 | 1 |
| Polr2e        | 1,03E-56 | 0,54656034 | 1,28E-52 | 1 |
| Fam3c         | 1,03E-56 | 0,50161    | 1,29E-52 | 1 |
| Pdlim7        | 3,04E-56 | 0,43948231 | 3,78E-52 | 1 |
| Npc2          | 9,46E-56 | 0,30372861 | 1,18E-51 | 1 |
| Fam213b       | 1,25E-55 | 0,52500952 | 1,55E-51 | 1 |
| Slc6a6        | 2,31E-55 | 0,48784536 | 2,87E-51 | 1 |
| Cd33          | 4,68E-55 | 0,48872511 | 5,83E-51 | 1 |
| Gpx4          | 7,43E-55 | 0,42069921 | 9,25E-51 | 1 |
| Laptm4a       | 3,36E-54 | 0,44091354 | 4,18E-50 | 1 |
| S100a1        | 1,09E-53 | 0,46008705 | 1,36E-49 | 1 |
| Lgals9        | 2,52E-52 | 0,46556157 | 3,14E-48 | 1 |
| P2ry12        | 7,79E-52 | 0,449325   | 9,70E-48 | 1 |
| Zfhx3         | 7,31E-51 | 0,43064837 | 9,10E-47 | 1 |
| Lipa          | 1,41E-50 | 0,43825    | 1,76E-46 | 1 |
| Pla2g15       | 4,33E-50 | 0,40947464 | 5,39E-46 | 1 |
| Axl           | 2,52E-49 | 0,42666706 | 3,14E-45 | 1 |
| Alox5         | 2,89E-49 | 0,42270846 | 3,60E-45 | 1 |
| Mef2c         | 1,09E-48 | 0,43524774 | 1,36E-44 | 1 |



|          |          |            |          |   |
|----------|----------|------------|----------|---|
| Tmbim1   | 2,93E-48 | 0,48585048 | 3,65E-44 | 1 |
| Gltp     | 8,12E-48 | 0,4582075  | 1,01E-43 | 1 |
| Ms4a7    | 1,40E-47 | 0,37148205 | 1,74E-43 | 1 |
| Selenow  | 1,81E-47 | 0,39554991 | 2,25E-43 | 1 |
| Vat1     | 2,49E-47 | 0,40909443 | 3,10E-43 | 1 |
| Gna15    | 1,91E-46 | 0,4089953  | 2,38E-42 | 1 |
| Asah1    | 4,83E-46 | 0,42844659 | 6,01E-42 | 1 |
| mt-Nd2   | 8,29E-46 | 0,30273287 | 1,03E-41 | 1 |
| Fuca1    | 8,89E-46 | 0,43113337 | 1,11E-41 | 1 |
| Ctsa     | 8,94E-46 | 0,43060171 | 1,11E-41 | 1 |
| Fn1      | 2,33E-45 | 0,54333645 | 2,90E-41 | 1 |
| Fez2     | 6,61E-45 | 0,3928375  | 8,22E-41 | 1 |
| Fbxw4    | 4,18E-44 | 0,34455302 | 5,20E-40 | 1 |
| Ski      | 1,00E-43 | 0,44853311 | 1,25E-39 | 1 |
| Smagp    | 1,08E-43 | 0,36068801 | 1,34E-39 | 1 |
| Qk       | 1,35E-43 | 0,42855259 | 1,68E-39 | 1 |
| Pkib     | 2,60E-42 | 0,38693352 | 3,24E-38 | 1 |
| Slc27a1  | 3,04E-42 | 0,39586687 | 3,79E-38 | 1 |
| Rftn1    | 5,36E-42 | 0,39668459 | 6,67E-38 | 1 |
| Colec12  | 2,46E-41 | 0,35774019 | 3,07E-37 | 1 |
| Sptbn1   | 6,65E-41 | 0,4136309  | 8,28E-37 | 1 |
| Mpp1     | 8,42E-41 | 0,4034486  | 1,05E-36 | 1 |
| Elmo1    | 1,17E-40 | 0,41089057 | 1,45E-36 | 1 |
| Ntpcr    | 3,70E-40 | 0,45323776 | 4,60E-36 | 1 |
| Glul     | 4,47E-40 | 0,37361521 | 5,56E-36 | 1 |
| Scamp2   | 8,10E-40 | 0,425329   | 1,01E-35 | 1 |
| Prune2   | 2,48E-39 | 0,37143181 | 3,09E-35 | 1 |
| Tgfb1    | 2,74E-39 | 0,39603205 | 3,41E-35 | 1 |
| Selenbp1 | 1,15E-38 | 0,31539217 | 1,43E-34 | 1 |
| Saraf    | 5,05E-38 | 0,40047713 | 6,28E-34 | 1 |
| Gusb     | 8,41E-38 | 0,38074394 | 1,05E-33 | 1 |
| Rnaset2a | 3,27E-37 | 0,40997261 | 4,08E-33 | 1 |
| Sash1    | 6,35E-37 | 0,33455349 | 7,91E-33 | 1 |
| Mfge8    | 1,07E-36 | 0,31727827 | 1,33E-32 | 1 |
| Lamtor1  | 1,39E-36 | 0,3849072  | 1,73E-32 | 1 |
| Rnf13    | 1,57E-36 | 0,38970453 | 1,95E-32 | 1 |
| Rasgef1b | 1,86E-36 | 0,37448891 | 2,31E-32 | 1 |
| Gng5     | 3,37E-36 | 0,26733754 | 4,19E-32 | 1 |
| Rhoa     | 5,68E-36 | 0,32236069 | 7,08E-32 | 1 |
| Pon3     | 5,71E-36 | 0,31613977 | 7,11E-32 | 1 |
| Dpp7     | 1,42E-35 | 0,32773033 | 1,77E-31 | 1 |
| Ctsf     | 1,48E-35 | 0,32548349 | 1,84E-31 | 1 |
| Rab11a   | 2,31E-35 | 0,36063733 | 2,87E-31 | 1 |
| Plod1    | 7,43E-35 | 0,3357589  | 9,25E-31 | 1 |
| Cd151    | 3,69E-34 | 0,34808711 | 4,60E-30 | 1 |
| Tmem141  | 5,08E-34 | 0,36044055 | 6,33E-30 | 1 |
| Igf1     | 5,21E-34 | 0,27319231 | 6,48E-30 | 1 |
| Tmem176b | 5,85E-34 | 0,31888938 | 7,28E-30 | 1 |
| Tmem59   | 9,91E-34 | 0,31767721 | 1,23E-29 | 1 |
| Kcnk13   | 2,34E-33 | 0,30943788 | 2,92E-29 | 1 |
| Skil     | 2,66E-33 | 0,3831111  | 3,31E-29 | 1 |
| Ifi27    | 2,95E-33 | 0,36385257 | 3,67E-29 | 1 |
| Srgap2   | 5,06E-33 | 0,34131366 | 6,30E-29 | 1 |
| Lmo2     | 6,39E-33 | 0,33168822 | 7,95E-29 | 1 |
| Fchsd2   | 7,22E-33 | 0,32211904 | 8,99E-29 | 1 |
| Sirt2    | 1,38E-32 | 0,36567157 | 1,71E-28 | 1 |
| Npl      | 3,08E-31 | 0,2849009  | 3,83E-27 | 1 |
| Itgb2    | 4,11E-31 | 0,34295123 | 5,11E-27 | 1 |
| Gns      | 4,58E-31 | 0,36156847 | 5,70E-27 | 1 |
| Rabac1   | 6,01E-31 | 0,3057313  | 7,49E-27 | 1 |
| Sptssa   | 8,76E-31 | 0,35135106 | 1,09E-26 | 1 |
| Cd84     | 1,27E-30 | 0,34264404 | 1,59E-26 | 1 |
| Cd109    | 2,02E-30 | 0,30667268 | 2,52E-26 | 1 |
| Bmyc     | 2,59E-30 | 0,32877399 | 3,22E-26 | 1 |
| Snx3     | 4,12E-30 | 0,29818425 | 5,13E-26 | 1 |
| Arl11    | 9,33E-30 | 0,34156756 | 1,16E-25 | 1 |
| Itm2c    | 1,45E-29 | 0,33759716 | 1,80E-25 | 1 |
| Cotl1    | 1,59E-29 | 0,30332237 | 1,98E-25 | 1 |
| Pdlim2   | 1,69E-29 | 0,32448954 | 2,10E-25 | 1 |
| Nagk     | 1,90E-29 | 0,34928011 | 2,37E-25 | 1 |
| Aldh2    | 3,95E-29 | 0,34688722 | 4,92E-25 | 1 |

|               |          |            |          |   |
|---------------|----------|------------|----------|---|
| Tagap         | 5,85E-29 | 0,33278864 | 7,28E-25 | 1 |
| 2010111I01Rik | 7,41E-29 | 0,31564012 | 9,22E-25 | 1 |
| Il11ra1       | 8,37E-29 | 0,27082444 | 1,04E-24 | 1 |
| Stom          | 1,25E-28 | 0,32351566 | 1,56E-24 | 1 |
| Ypel3         | 1,33E-28 | 0,32974128 | 1,65E-24 | 1 |
| Tmem50a       | 1,61E-28 | 0,27724554 | 2,00E-24 | 1 |
| Blvrb         | 2,61E-28 | 0,28072797 | 3,24E-24 | 1 |
| S100a13       | 7,11E-28 | 0,29903192 | 8,85E-24 | 1 |
| Mdh1          | 7,70E-28 | 0,34816925 | 9,58E-24 | 1 |
| Tspan4        | 8,59E-28 | 0,32035385 | 1,07E-23 | 1 |
| Lyl1          | 1,72E-27 | 0,29847399 | 2,14E-23 | 1 |
| Cebpa         | 2,26E-27 | 0,28459349 | 2,82E-23 | 1 |
| Cdkn2c        | 2,45E-27 | 0,2984735  | 3,05E-23 | 1 |
| Plbd2         | 2,73E-27 | 0,32989704 | 3,40E-23 | 1 |
| Ass1          | 3,14E-27 | 0,28415135 | 3,91E-23 | 1 |
| Pbxip1        | 3,53E-27 | 0,3272114  | 4,40E-23 | 1 |
| Blnk          | 3,57E-27 | 0,32797944 | 4,44E-23 | 1 |
| Tnfrsf21      | 4,38E-27 | 0,28373443 | 5,45E-23 | 1 |
| H2-K1         | 1,41E-26 | 0,28233487 | 1,76E-22 | 1 |
| Cyb5a         | 3,36E-26 | 0,2918952  | 4,18E-22 | 1 |
| Rtcb          | 4,03E-26 | 0,35297523 | 5,02E-22 | 1 |
| Plxnb2        | 6,51E-26 | 0,3281375  | 8,10E-22 | 1 |
| Gtmp          | 8,98E-26 | 0,31767477 | 1,12E-21 | 1 |
| Chd9          | 1,53E-25 | 0,28032357 | 1,90E-21 | 1 |
| Qpct          | 4,25E-25 | 0,26590276 | 5,29E-21 | 1 |
| Atraid        | 7,34E-25 | 0,31925218 | 9,14E-21 | 1 |
| Ptpa          | 8,59E-25 | 0,29220665 | 1,07E-20 | 1 |
| Tsc22d3       | 1,01E-24 | 0,28533768 | 1,26E-20 | 1 |
| Zbtb20        | 1,31E-24 | 0,30427659 | 1,63E-20 | 1 |
| Dstn          | 1,88E-24 | 0,25530644 | 2,34E-20 | 1 |
| Entpd1        | 1,94E-24 | 0,29434754 | 2,42E-20 | 1 |
| App           | 2,43E-24 | 0,30352582 | 3,02E-20 | 1 |
| Rab31         | 2,86E-24 | 0,2833116  | 3,57E-20 | 1 |
| P2ry6         | 4,17E-24 | 0,29066127 | 5,19E-20 | 1 |
| Sesn1         | 9,50E-24 | 0,25829154 | 1,18E-19 | 1 |
| Abca1         | 9,88E-24 | 0,26763315 | 1,23E-19 | 1 |
| Dusp3         | 1,13E-23 | 0,31700179 | 1,41E-19 | 1 |
| Mgst3         | 1,70E-23 | 0,26273115 | 2,11E-19 | 1 |
| Tgfbr2        | 1,94E-23 | 0,26853564 | 2,41E-19 | 1 |
| Gnas          | 2,41E-23 | 0,30496891 | 3,00E-19 | 1 |
| Dhrs7         | 4,06E-23 | 0,30631216 | 5,06E-19 | 1 |
| Cyfp1         | 5,38E-23 | 0,29721707 | 6,70E-19 | 1 |
| Renbp         | 6,62E-23 | 0,26377364 | 8,23E-19 | 1 |
| Sfxn3         | 1,00E-22 | 0,27412601 | 1,25E-18 | 1 |
| Ddx3x         | 1,94E-22 | 0,30815306 | 2,41E-18 | 1 |
| Slc29a1       | 1,96E-22 | 0,2633416  | 2,44E-18 | 1 |
| Nptn          | 2,27E-22 | 0,28484941 | 2,82E-18 | 1 |
| Macf1         | 3,24E-22 | 0,31188729 | 4,03E-18 | 1 |
| Itgb1         | 3,65E-22 | 0,29983043 | 4,54E-18 | 1 |
| Dtnbp1        | 3,95E-22 | 0,29768388 | 4,91E-18 | 1 |
| Dnase2a       | 4,52E-22 | 0,26891271 | 5,63E-18 | 1 |
| Commd10       | 5,14E-22 | 0,26868967 | 6,39E-18 | 1 |
| Luzp1         | 5,48E-22 | 0,26893718 | 6,82E-18 | 1 |
| Hsbp1         | 6,56E-22 | 0,29235948 | 8,17E-18 | 1 |
| Tmem9b        | 1,37E-21 | 0,30416985 | 1,71E-17 | 1 |
| Klc1          | 1,81E-21 | 0,26896493 | 2,25E-17 | 1 |
| Itgav         | 2,05E-21 | 0,27792486 | 2,56E-17 | 1 |
| Ifi2712a      | 5,80E-21 | 0,33180382 | 7,21E-17 | 1 |
| Rab3il1       | 5,94E-21 | 0,27222402 | 7,39E-17 | 1 |
| Sec14l1       | 8,27E-21 | 0,2755764  | 1,03E-16 | 1 |
| P2rx4         | 1,10E-20 | 0,26177232 | 1,36E-16 | 1 |
| Marcks        | 1,38E-20 | 0,29577974 | 1,72E-16 | 1 |
| Map1lc3a      | 1,82E-20 | 0,26546397 | 2,26E-16 | 1 |
| Cebpg         | 3,40E-20 | 0,27083789 | 4,23E-16 | 1 |
| Klhl6         | 5,43E-20 | 0,26857498 | 6,76E-16 | 1 |
| Uchl3         | 9,25E-20 | 0,2737288  | 1,15E-15 | 1 |
| Dok3          | 1,01E-19 | 0,26637133 | 1,25E-15 | 1 |
| Rab11fip5     | 1,23E-19 | 0,25262502 | 1,53E-15 | 1 |
| Nucb1         | 1,39E-19 | 0,28821036 | 1,73E-15 | 1 |
| Ubxn1         | 1,76E-19 | 0,27581537 | 2,19E-15 | 1 |
| Rnaset2b      | 2,02E-19 | 0,26218696 | 2,52E-15 | 1 |

|          |           |            |            |   |
|----------|-----------|------------|------------|---|
| Mapk3    | 2,11E-19  | 0,31008457 | 2,63E-15   | 1 |
| Mtdh     | 2,66E-19  | 0,28164837 | 3,31E-15   | 1 |
| Crif2    | 2,93E-19  | 0,2647048  | 3,64E-15   | 1 |
| Tecr     | 5,06E-19  | 0,29279138 | 6,30E-15   | 1 |
| Samd9l   | 9,23E-19  | 0,271343   | 1,15E-14   | 1 |
| Ergic3   | 1,40E-18  | 0,27715559 | 1,74E-14   | 1 |
| Ssbp4    | 2,11E-18  | 0,25597581 | 2,63E-14   | 1 |
| Necap2   | 2,27E-18  | 0,28256847 | 2,82E-14   | 1 |
| Atp6ap1  | 2,28E-18  | 0,25543895 | 2,84E-14   | 1 |
| Stx4a    | 2,96E-18  | 0,27937971 | 3,68E-14   | 1 |
| Klf4     | 4,77E-18  | 0,33841584 | 5,94E-14   | 1 |
| Akr1b3   | 1,10E-17  | 0,25647133 | 1,37E-13   | 1 |
| Sh3glb1  | 1,11E-17  | 0,25069571 | 1,38E-13   | 1 |
| Creg1    | 1,44E-17  | 0,26414841 | 1,79E-13   | 1 |
| Pnkd     | 1,88E-17  | 0,25176554 | 2,34E-13   | 1 |
| Bmp2k    | 6,32E-17  | 0,26114964 | 7,87E-13   | 1 |
| Bst2     | 1,77E-16  | 0,27963501 | 2,20E-12   | 1 |
| Clic4    | 5,44E-16  | 0,25589628 | 6,76E-12   | 1 |
| Zmiz1    | 3,82E-15  | 0,2538587  | 4,75E-11   | 1 |
| Ccl3     | 1,62E-13  | 0,43742017 | 2,01E-09   | 1 |
| Ier2     | 1,12E-07  | 0,39161155 | 0,00139362 | 1 |
| Egr1     | 1,17E-07  | 0,36063289 | 0,00145901 | 1 |
| Fosb     | 7,79E-05  | 0,28185223 | 0,96907157 | 1 |
| Pf4      | 9,51E-236 | 1,78135194 | 1,18E-231  | 2 |
| Selenop  | 9,38E-194 | 1,44156886 | 1,17E-189  | 2 |
| Aqp1     | 1,59E-188 | 1,46597495 | 1,98E-184  | 2 |
| Fxyd2    | 1,82E-187 | 1,70997512 | 2,27E-183  | 2 |
| Gas6     | 4,10E-177 | 1,16055798 | 5,10E-173  | 2 |
| F13a1    | 1,80E-176 | 1,29945869 | 2,24E-172  | 2 |
| Lyve1    | 6,05E-176 | 1,35127893 | 7,52E-172  | 2 |
| Ccl24    | 2,05E-167 | 1,33819394 | 2,55E-163  | 2 |
| Mrc1     | 3,96E-163 | 1,11899613 | 4,93E-159  | 2 |
| Cd81     | 1,29E-148 | 1,11898058 | 1,61E-144  | 2 |
| Serinc3  | 3,65E-135 | 0,85096341 | 4,54E-131  | 2 |
| Fcgrt    | 1,51E-132 | 1,04434872 | 1,88E-128  | 2 |
| Folr2    | 5,16E-131 | 0,95979844 | 6,42E-127  | 2 |
| Dab2     | 7,07E-124 | 0,89914255 | 8,80E-120  | 2 |
| Cd36     | 1,71E-120 | 0,95890138 | 2,13E-116  | 2 |
| Igfbp4   | 2,39E-118 | 1,00514707 | 2,97E-114  | 2 |
| Cfh      | 3,75E-112 | 0,87422494 | 4,67E-108  | 2 |
| Rnase4   | 4,70E-112 | 0,85187994 | 5,85E-108  | 2 |
| Itn2b    | 1,40E-108 | 0,64139265 | 1,74E-104  | 2 |
| Wwp1     | 5,24E-108 | 0,94872244 | 6,52E-104  | 2 |
| C1qc     | 1,07E-106 | 0,81215215 | 1,33E-102  | 2 |
| Ehd4     | 9,10E-103 | 0,83447805 | 1,13E-98   | 2 |
| Maf      | 1,03E-98  | 0,84232093 | 1,28E-94   | 2 |
| Glul     | 5,47E-92  | 0,76967879 | 6,81E-88   | 2 |
| Selenbp1 | 1,01E-91  | 0,85172616 | 1,26E-87   | 2 |
| Malat1   | 1,20E-91  | 0,48427492 | 1,49E-87   | 2 |
| Blvrb    | 3,28E-91  | 0,7902671  | 4,08E-87   | 2 |
| C1qa     | 3,29E-90  | 0,74001328 | 4,09E-86   | 2 |
| Cd163    | 8,37E-89  | 1,20528125 | 1,04E-84   | 2 |
| Txnip    | 9,75E-89  | 0,80741991 | 1,21E-84   | 2 |
| Csf1r    | 1,01E-82  | 0,65265612 | 1,26E-78   | 2 |
| Fgfr1    | 3,17E-82  | 0,77135492 | 3,94E-78   | 2 |
| Calm2    | 1,95E-81  | 0,53534909 | 2,42E-77   | 2 |
| C1qb     | 1,07E-77  | 0,66827549 | 1,34E-73   | 2 |
| Pmp22    | 1,49E-72  | 0,64598475 | 1,86E-68   | 2 |
| Snx2     | 7,19E-70  | 0,74266715 | 8,95E-66   | 2 |
| Serpnb6a | 2,24E-69  | 0,6325961  | 2,79E-65   | 2 |
| Ninj1    | 2,78E-69  | 0,7505919  | 3,46E-65   | 2 |
| Tppp3    | 2,36E-66  | 0,79676854 | 2,94E-62   | 2 |
| Cbr2     | 3,50E-66  | 0,64001864 | 4,36E-62   | 2 |
| Tslp     | 1,01E-65  | 0,64044307 | 1,26E-61   | 2 |
| Rgs10    | 1,20E-65  | 0,55247436 | 1,50E-61   | 2 |
| Ltc4s    | 2,22E-65  | 0,67193772 | 2,76E-61   | 2 |
| Mafb     | 1,64E-64  | 0,62616396 | 2,05E-60   | 2 |
| Gatm     | 7,91E-64  | 0,671656   | 9,85E-60   | 2 |
| Cd63     | 1,63E-63  | 0,52110676 | 2,03E-59   | 2 |
| Frd4b    | 3,26E-62  | 0,63592992 | 4,05E-58   | 2 |
| Pepd     | 8,86E-62  | 0,67311107 | 1,10E-57   | 2 |

|          |          |            |          |   |
|----------|----------|------------|----------|---|
| Ecm1     | 1,13E-60 | 0,62602189 | 1,40E-56 | 2 |
| Snx5     | 1,50E-60 | 0,61888952 | 1,87E-56 | 2 |
| Stab1    | 4,86E-60 | 0,69719692 | 6,05E-56 | 2 |
| Stard8   | 1,82E-58 | 0,65714354 | 2,26E-54 | 2 |
| Mtss1    | 2,00E-57 | 0,6240031  | 2,49E-53 | 2 |
| Ighm     | 1,04E-56 | 0,79843695 | 1,30E-52 | 2 |
| Ahnak    | 3,77E-54 | 0,44251303 | 4,69E-50 | 2 |
| Ctsb     | 2,40E-53 | 0,41227221 | 2,98E-49 | 2 |
| Gas7     | 4,44E-53 | 0,64083932 | 5,52E-49 | 2 |
| Lifr     | 1,09E-52 | 0,57367345 | 1,36E-48 | 2 |
| Mef2c    | 3,01E-52 | 0,57069604 | 3,74E-48 | 2 |
| Pltp     | 7,13E-52 | 0,47441768 | 8,87E-48 | 2 |
| Tns1     | 3,25E-51 | 0,62001747 | 4,05E-47 | 2 |
| Selenom  | 4,92E-50 | 0,59905078 | 6,13E-46 | 2 |
| P2ry12   | 6,23E-50 | 0,60768679 | 7,75E-46 | 2 |
| Rabac1   | 1,53E-49 | 0,4984095  | 1,90E-45 | 2 |
| Cst3     | 3,83E-47 | 0,33143069 | 4,76E-43 | 2 |
| Cltc     | 6,82E-45 | 0,59078364 | 8,49E-41 | 2 |
| Fcgr3    | 8,17E-43 | 0,45908428 | 1,02E-38 | 2 |
| Nr3c1    | 1,19E-42 | 0,55189024 | 1,48E-38 | 2 |
| Pros1    | 1,84E-42 | 0,57832107 | 2,29E-38 | 2 |
| Tgfb2    | 4,71E-42 | 0,56169223 | 5,86E-38 | 2 |
| Ptpn18   | 2,01E-41 | 0,52092585 | 2,50E-37 | 2 |
| Rin2     | 3,71E-41 | 0,53108251 | 4,62E-37 | 2 |
| Ang      | 8,19E-40 | 0,56499832 | 1,02E-35 | 2 |
| Fkbp1a   | 2,03E-38 | 0,4718315  | 2,53E-34 | 2 |
| Fcna     | 2,97E-38 | 0,63843553 | 3,69E-34 | 2 |
| Ap1p2    | 1,78E-37 | 0,48525562 | 2,21E-33 | 2 |
| Ppia     | 4,50E-37 | 0,25024664 | 5,60E-33 | 2 |
| Ap1b1    | 9,69E-37 | 0,57457455 | 1,21E-32 | 2 |
| Dstn     | 9,95E-37 | 0,41734052 | 1,24E-32 | 2 |
| Npl      | 1,80E-36 | 0,50772792 | 2,24E-32 | 2 |
| Gypc     | 3,55E-36 | 0,45162424 | 4,42E-32 | 2 |
| Sult1a1  | 1,60E-35 | 0,47907548 | 2,00E-31 | 2 |
| Timp2    | 3,20E-35 | 0,287757   | 3,99E-31 | 2 |
| Etv1     | 6,20E-35 | 0,45784137 | 7,71E-31 | 2 |
| Cracr2b  | 6,26E-35 | 0,45068188 | 7,79E-31 | 2 |
| Fez2     | 7,02E-35 | 0,51365928 | 8,74E-31 | 2 |
| Hexa     | 1,93E-34 | 0,38943777 | 2,40E-30 | 2 |
| Igf1     | 3,51E-34 | 0,57372872 | 4,37E-30 | 2 |
| Ypel3    | 1,44E-33 | 0,48509227 | 1,79E-29 | 2 |
| Alox5    | 1,55E-33 | 0,47216588 | 1,93E-29 | 2 |
| Nrp1     | 1,99E-33 | 0,5338367  | 2,47E-29 | 2 |
| Trf      | 2,66E-33 | 0,54162189 | 3,31E-29 | 2 |
| Gpr34    | 5,40E-33 | 0,40712812 | 6,72E-29 | 2 |
| Cd302    | 1,48E-32 | 0,49960022 | 1,85E-28 | 2 |
| Lgmn     | 2,48E-32 | 0,33510291 | 3,09E-28 | 2 |
| Abca9    | 4,84E-32 | 0,44616194 | 6,03E-28 | 2 |
| Hpgd     | 1,06E-31 | 0,45047468 | 1,32E-27 | 2 |
| Laptm4a  | 1,72E-31 | 0,41703956 | 2,15E-27 | 2 |
| Eps8     | 2,66E-30 | 0,47853892 | 3,32E-26 | 2 |
| Ap2a2    | 3,40E-30 | 0,52783379 | 4,23E-26 | 2 |
| Lamp1    | 6,44E-30 | 0,37379032 | 8,02E-26 | 2 |
| Myo5a    | 1,17E-29 | 0,4887522  | 1,45E-25 | 2 |
| Tcf4     | 1,31E-29 | 0,45386332 | 1,63E-25 | 2 |
| S100a6   | 5,07E-29 | 0,27998297 | 6,31E-25 | 2 |
| Tmem50a  | 8,85E-29 | 0,35531853 | 1,10E-24 | 2 |
| Pdlim1   | 1,06E-28 | 0,46193228 | 1,32E-24 | 2 |
| Cavin1   | 1,32E-28 | 0,392023   | 1,64E-24 | 2 |
| Bin1     | 2,24E-28 | 0,32465828 | 2,79E-24 | 2 |
| Clta     | 8,32E-28 | 0,32456739 | 1,04E-23 | 2 |
| Ifi2712a | 9,86E-28 | 0,64045759 | 1,23E-23 | 2 |
| Rgl1     | 6,34E-27 | 0,45587623 | 7,89E-23 | 2 |
| Idh2     | 1,11E-26 | 0,49433681 | 1,38E-22 | 2 |
| Tmem37   | 2,27E-26 | 0,3498163  | 2,83E-22 | 2 |
| Adgre1   | 6,38E-26 | 0,38602872 | 7,94E-22 | 2 |
| Qpct     | 8,78E-26 | 0,47093578 | 1,09E-21 | 2 |
| Psd3     | 9,74E-26 | 0,3890519  | 1,21E-21 | 2 |
| Smagp    | 1,19E-25 | 0,37760044 | 1,48E-21 | 2 |
| Colec12  | 1,66E-25 | 0,42981448 | 2,07E-21 | 2 |
| Dhrs3    | 5,02E-25 | 0,36550862 | 6,25E-21 | 2 |

|               |          |            |          |   |
|---------------|----------|------------|----------|---|
| Tspan4        | 7,55E-25 | 0,45412036 | 9,40E-21 | 2 |
| Timd4         | 2,42E-24 | 0,42278263 | 3,02E-20 | 2 |
| Dusp22        | 3,70E-24 | 0,41811986 | 4,61E-20 | 2 |
| Zfp36l1       | 3,97E-24 | 0,39470593 | 4,94E-20 | 2 |
| Rab11fip5     | 6,01E-24 | 0,39468805 | 7,48E-20 | 2 |
| Sesn1         | 7,16E-24 | 0,39340285 | 8,91E-20 | 2 |
| Cd37          | 7,99E-24 | 0,38677814 | 9,94E-20 | 2 |
| Gstm1         | 8,07E-24 | 0,44275278 | 1,00E-19 | 2 |
| Evi5          | 8,41E-24 | 0,36057498 | 1,05E-19 | 2 |
| Sulf2         | 9,63E-24 | 0,3890787  | 1,20E-19 | 2 |
| Tlr7          | 2,65E-23 | 0,395689   | 3,30E-19 | 2 |
| Snx3          | 5,85E-23 | 0,33935836 | 7,28E-19 | 2 |
| P2ry6         | 5,31E-22 | 0,41765669 | 6,61E-18 | 2 |
| S100a1        | 8,18E-22 | 0,42757087 | 1,02E-17 | 2 |
| Dok2          | 8,31E-22 | 0,4465098  | 1,03E-17 | 2 |
| Vat1          | 8,99E-22 | 0,41005194 | 1,12E-17 | 2 |
| Man1a         | 1,88E-21 | 0,41396322 | 2,34E-17 | 2 |
| Hpgds         | 3,19E-21 | 0,39246338 | 3,97E-17 | 2 |
| Ctsc          | 4,05E-21 | 0,28057902 | 5,04E-17 | 2 |
| Pea15a        | 4,30E-21 | 0,44152874 | 5,35E-17 | 2 |
| Lamp2         | 4,46E-21 | 0,3393096  | 5,56E-17 | 2 |
| Sptbn1        | 5,72E-21 | 0,41647423 | 7,12E-17 | 2 |
| Gltp          | 1,23E-20 | 0,31738217 | 1,52E-16 | 2 |
| Mrfap1        | 1,65E-20 | 0,32519123 | 2,05E-16 | 2 |
| Tsc22d3       | 2,86E-20 | 0,35885785 | 3,57E-16 | 2 |
| Mgl2          | 3,70E-20 | 0,41799173 | 4,60E-16 | 2 |
| Itsn1         | 5,52E-20 | 0,35944414 | 6,87E-16 | 2 |
| Abhd12        | 6,06E-20 | 0,35938213 | 7,54E-16 | 2 |
| C4b           | 9,19E-20 | 0,57950543 | 1,14E-15 | 2 |
| Eps15         | 1,47E-19 | 0,43419722 | 1,83E-15 | 2 |
| Cyb5a         | 2,13E-19 | 0,38759667 | 2,65E-15 | 2 |
| Rapgef6       | 2,33E-19 | 0,38104897 | 2,90E-15 | 2 |
| Hprt          | 3,17E-19 | 0,32403769 | 3,94E-15 | 2 |
| Mpp1          | 1,03E-18 | 0,36399822 | 1,29E-14 | 2 |
| Clec10a       | 1,91E-18 | 0,49064825 | 2,38E-14 | 2 |
| Hmox2         | 7,49E-18 | 0,37709206 | 9,32E-14 | 2 |
| Ncoa4         | 8,36E-18 | 0,38718893 | 1,04E-13 | 2 |
| Lyl1          | 9,33E-18 | 0,39479722 | 1,16E-13 | 2 |
| Selenof       | 9,87E-18 | 0,27530643 | 1,23E-13 | 2 |
| Aldh2         | 1,03E-17 | 0,32229627 | 1,28E-13 | 2 |
| Rasgrp3       | 1,23E-17 | 0,32270248 | 1,53E-13 | 2 |
| Cyb5r3        | 1,57E-17 | 0,38788899 | 1,95E-13 | 2 |
| Rnf13         | 3,05E-17 | 0,34326647 | 3,80E-13 | 2 |
| Atraid        | 3,16E-17 | 0,3320633  | 3,93E-13 | 2 |
| Mgst3         | 4,85E-17 | 0,34321166 | 6,04E-13 | 2 |
| Hist1h2bc     | 5,03E-17 | 0,39192307 | 6,26E-13 | 2 |
| Hacd4         | 8,49E-17 | 0,38857792 | 1,06E-12 | 2 |
| Pink1         | 8,69E-17 | 0,34490879 | 1,08E-12 | 2 |
| Rab11a        | 1,34E-16 | 0,31605138 | 1,67E-12 | 2 |
| Rassf4        | 1,98E-16 | 0,32727636 | 2,46E-12 | 2 |
| Anxa6         | 2,08E-16 | 0,37459817 | 2,59E-12 | 2 |
| Tmem59        | 2,39E-16 | 0,27366043 | 2,97E-12 | 2 |
| Gabarapl1     | 3,79E-16 | 0,34827547 | 4,72E-12 | 2 |
| Higd2a        | 5,41E-16 | 0,33497794 | 6,73E-12 | 2 |
| Prune2        | 6,64E-16 | 0,36754039 | 8,27E-12 | 2 |
| Polr3gl       | 1,29E-15 | 0,36077    | 1,60E-11 | 2 |
| Kif1b         | 1,33E-15 | 0,374063   | 1,66E-11 | 2 |
| Sgpp1         | 1,70E-15 | 0,35071254 | 2,12E-11 | 2 |
| Rfk           | 2,67E-15 | 0,36036461 | 3,33E-11 | 2 |
| Dse           | 4,36E-15 | 0,33860627 | 5,42E-11 | 2 |
| 2610507B11Rik | 4,88E-15 | 0,32740785 | 6,08E-11 | 2 |
| Vkorc1        | 4,89E-15 | 0,34777228 | 6,09E-11 | 2 |
| Sec14l1       | 5,44E-15 | 0,32972636 | 6,77E-11 | 2 |
| Foxp1         | 5,89E-15 | 0,3477488  | 7,32E-11 | 2 |
| Sec62         | 6,42E-15 | 0,30151037 | 7,98E-11 | 2 |
| S1pr1         | 1,45E-14 | 0,28481541 | 1,80E-10 | 2 |
| Pon2          | 1,97E-14 | 0,33199461 | 2,45E-10 | 2 |
| Scamp2        | 2,47E-14 | 0,34132503 | 3,08E-10 | 2 |
| Acat1         | 6,61E-14 | 0,33409907 | 8,22E-10 | 2 |
| Tspan17       | 8,88E-14 | 0,29102634 | 1,11E-09 | 2 |
| Rgs18         | 1,40E-13 | 0,33844422 | 1,74E-09 | 2 |

|           |          |            |            |   |
|-----------|----------|------------|------------|---|
| Borcs6    | 2,21E-13 | 0,29623016 | 2,75E-09   | 2 |
| Unc93b1   | 2,79E-13 | 0,25487499 | 3,48E-09   | 2 |
| Cd48      | 4,33E-13 | 0,26907375 | 5,39E-09   | 2 |
| H2afv     | 5,70E-13 | 0,29533529 | 7,09E-09   | 2 |
| Gpr183    | 8,49E-13 | 0,33012647 | 1,06E-08   | 2 |
| Zcchc6    | 9,60E-13 | 0,31733242 | 1,19E-08   | 2 |
| Slc9a3r2  | 1,12E-12 | 0,27600273 | 1,39E-08   | 2 |
| Pts       | 1,15E-12 | 0,35576999 | 1,43E-08   | 2 |
| Tnfaip8l2 | 1,31E-12 | 0,30424841 | 1,62E-08   | 2 |
| Slco2b1   | 1,91E-12 | 0,2649033  | 2,37E-08   | 2 |
| Hfe       | 2,99E-12 | 0,31726726 | 3,72E-08   | 2 |
| Lipa      | 2,99E-12 | 0,29625515 | 3,73E-08   | 2 |
| Serpib1a  | 3,55E-12 | 0,26208369 | 4,42E-08   | 2 |
| Tmem141   | 3,59E-12 | 0,28672569 | 4,47E-08   | 2 |
| Ifi207    | 3,88E-12 | 0,32140202 | 4,83E-08   | 2 |
| Cd33      | 4,11E-12 | 0,31514681 | 5,12E-08   | 2 |
| Sh3bgrl   | 4,42E-12 | 0,27721484 | 5,51E-08   | 2 |
| Akr1b3    | 8,64E-12 | 0,30082581 | 1,08E-07   | 2 |
| Tsen34    | 9,51E-12 | 0,34710517 | 1,18E-07   | 2 |
| Retnla    | 1,06E-11 | 1,18095646 | 1,32E-07   | 2 |
| Al467606  | 1,13E-11 | 0,29452734 | 1,41E-07   | 2 |
| Ralbp1    | 1,18E-11 | 0,35174071 | 1,46E-07   | 2 |
| Comt      | 1,38E-11 | 0,25238835 | 1,71E-07   | 2 |
| Ahnak2    | 1,57E-11 | 0,30764408 | 1,96E-07   | 2 |
| Ndfip1    | 1,90E-11 | 0,30250061 | 2,37E-07   | 2 |
| Trmt1     | 2,35E-11 | 0,32702597 | 2,92E-07   | 2 |
| Foxn3     | 3,31E-11 | 0,30291244 | 4,12E-07   | 2 |
| Snx6      | 3,38E-11 | 0,32475424 | 4,20E-07   | 2 |
| Anp32a    | 3,44E-11 | 0,25866754 | 4,28E-07   | 2 |
| Hp1bp3    | 3,87E-11 | 0,32499177 | 4,82E-07   | 2 |
| Trim47    | 4,22E-11 | 0,2802805  | 5,25E-07   | 2 |
| Tnfsf12   | 6,02E-11 | 0,29031844 | 7,49E-07   | 2 |
| Ppp3ca    | 6,73E-11 | 0,29694173 | 8,37E-07   | 2 |
| Snx8      | 6,74E-11 | 0,30130396 | 8,39E-07   | 2 |
| Cln8      | 6,81E-11 | 0,2826238  | 8,48E-07   | 2 |
| Nisch     | 8,88E-11 | 0,30622522 | 1,11E-06   | 2 |
| Ndufs7    | 1,00E-10 | 0,25677806 | 1,25E-06   | 2 |
| Spred1    | 1,04E-10 | 0,30131265 | 1,29E-06   | 2 |
| Rsrp1     | 1,24E-10 | 0,29841023 | 1,54E-06   | 2 |
| Smim10l1  | 1,59E-10 | 0,27107584 | 1,98E-06   | 2 |
| Slc29a1   | 1,99E-10 | 0,30210441 | 2,48E-06   | 2 |
| Dguok     | 2,44E-10 | 0,27331844 | 3,04E-06   | 2 |
| Cdkn2c    | 2,92E-10 | 0,28508672 | 3,63E-06   | 2 |
| Mbnl1     | 3,00E-10 | 0,25994561 | 3,73E-06   | 2 |
| Rnf130    | 3,49E-10 | 0,30841304 | 4,34E-06   | 2 |
| Hmgn1     | 6,36E-10 | 0,28884334 | 7,91E-06   | 2 |
| Mindy2    | 7,78E-10 | 0,26591671 | 9,68E-06   | 2 |
| Ssh2      | 8,11E-10 | 0,25985775 | 1,01E-05   | 2 |
| Eid1      | 1,30E-09 | 0,27629695 | 1,61E-05   | 2 |
| Ifi203    | 1,38E-09 | 0,3219021  | 1,72E-05   | 2 |
| Mid1ip1   | 1,46E-09 | 0,2550516  | 1,82E-05   | 2 |
| Stk17b    | 1,67E-09 | 0,2753971  | 2,08E-05   | 2 |
| Ly96      | 1,76E-09 | 0,30430652 | 2,19E-05   | 2 |
| Tex264    | 1,82E-09 | 0,28049393 | 2,27E-05   | 2 |
| Dnase1l1  | 2,15E-09 | 0,27907905 | 2,67E-05   | 2 |
| Sdhc      | 2,45E-09 | 0,26088265 | 3,05E-05   | 2 |
| Anxa11    | 3,20E-09 | 0,31205136 | 3,98E-05   | 2 |
| Leprot    | 3,26E-09 | 0,25970118 | 4,06E-05   | 2 |
| Tprgl     | 3,93E-09 | 0,26529765 | 4,89E-05   | 2 |
| Fam46a    | 4,55E-09 | 0,28359774 | 5,66E-05   | 2 |
| Itpripl2  | 5,21E-09 | 0,28850682 | 6,48E-05   | 2 |
| Zbtb20    | 5,98E-09 | 0,28380932 | 7,44E-05   | 2 |
| Tacc1     | 7,64E-09 | 0,25933729 | 9,51E-05   | 2 |
| Acot13    | 8,45E-09 | 0,2737015  | 0,00010512 | 2 |
| Pkig      | 8,49E-09 | 0,27486678 | 0,0001057  | 2 |
| Dusp6     | 9,10E-09 | 0,28147595 | 0,00011325 | 2 |
| Oat       | 1,12E-08 | 0,2972081  | 0,00013901 | 2 |
| Rab31     | 1,12E-08 | 0,25375003 | 0,00013958 | 2 |
| Fcgr2b    | 1,75E-08 | 0,27730714 | 0,00021724 | 2 |
| Pgrmc1    | 1,84E-08 | 0,25844364 | 0,00022853 | 2 |
| Fcho2     | 2,11E-08 | 0,2590027  | 0,00026323 | 2 |

|          |          |            |            |   |
|----------|----------|------------|------------|---|
| Nudt9    | 2,57E-08 | 0,26255707 | 0,00031991 | 2 |
| Ap2m1    | 3,17E-08 | 0,2535148  | 0,0003943  | 2 |
| Fnta     | 6,60E-08 | 0,26564159 | 0,00082163 | 2 |
| Hcst     | 7,34E-08 | 0,27522823 | 0,00091335 | 2 |
| Cltb     | 8,49E-08 | 0,2925144  | 0,00105718 | 2 |
| Tep1     | 9,27E-08 | 0,26637283 | 0,00115337 | 2 |
| Nenf     | 1,27E-07 | 0,28387981 | 0,00157746 | 2 |
| Prcp     | 2,44E-07 | 0,27455412 | 0,00303942 | 2 |
| Tmem106a | 3,13E-07 | 0,2629564  | 0,00389212 | 2 |
| Ptafr    | 4,39E-07 | 0,26620332 | 0,00546429 | 2 |
| Cnpy2    | 4,72E-07 | 0,27053836 | 0,00588032 | 2 |
| Pdlim4   | 7,30E-07 | 0,25188479 | 0,00908332 | 2 |
| Slc48a1  | 1,68E-06 | 0,27391237 | 0,02096771 | 2 |
| Tcn2     | 2,10E-06 | 0,25293034 | 0,02612902 | 2 |
| Sbds     | 2,89E-06 | 0,25965185 | 0,03595343 | 2 |
| Mndal    | 6,16E-06 | 0,25404334 | 0,07662348 | 2 |
| Pf4      | 8,53E-76 | 0,67090436 | 1,06E-71   | 3 |
| Mrc1     | 2,25E-42 | 0,58378536 | 2,80E-38   | 3 |
| Mt1      | 1,20E-38 | 0,71939477 | 1,50E-34   | 3 |
| Mt2      | 4,89E-36 | 0,82576481 | 6,09E-32   | 3 |
| Igfbp4   | 4,15E-31 | 0,43899834 | 5,16E-27   | 3 |
| Malat1   | 2,01E-29 | 0,29950227 | 2,51E-25   | 3 |
| Cd81     | 4,98E-28 | 0,41540026 | 6,20E-24   | 3 |
| Mgl2     | 7,12E-28 | 0,51581715 | 8,86E-24   | 3 |
| Ighm     | 3,19E-27 | 0,47715545 | 3,97E-23   | 3 |
| Dab2     | 8,28E-27 | 0,3704558  | 1,03E-22   | 3 |
| Fxyd2    | 1,84E-25 | 0,44974891 | 2,29E-21   | 3 |
| Cd36     | 4,09E-25 | 0,45267322 | 5,08E-21   | 3 |
| Jund     | 3,03E-23 | 0,64887153 | 3,77E-19   | 3 |
| Egr1     | 5,58E-23 | 0,67041285 | 6,94E-19   | 3 |
| Selenop  | 6,89E-23 | 0,25117013 | 8,58E-19   | 3 |
| Gas7     | 2,80E-22 | 0,40475234 | 3,48E-18   | 3 |
| Lifr     | 1,64E-21 | 0,3237115  | 2,04E-17   | 3 |
| Slamf9   | 1,94E-21 | 0,52086621 | 2,41E-17   | 3 |
| H2-Eb1   | 2,50E-21 | 0,47632629 | 3,11E-17   | 3 |
| Serinc3  | 3,68E-21 | 0,30848391 | 4,58E-17   | 3 |
| Aqp1     | 8,59E-21 | 0,47529553 | 1,07E-16   | 3 |
| Cd93     | 1,11E-19 | 0,34940513 | 1,38E-15   | 3 |
| Mafb     | 2,22E-18 | 0,33339194 | 2,77E-14   | 3 |
| Rtn4     | 4,82E-18 | 0,39726303 | 6,00E-14   | 3 |
| H2-Aa    | 8,40E-18 | 0,45665025 | 1,05E-13   | 3 |
| Klf6     | 2,57E-17 | 0,43025407 | 3,20E-13   | 3 |
| Tmem176b | 1,02E-16 | 0,3177546  | 1,27E-12   | 3 |
| Mtss1    | 1,60E-15 | 0,32624392 | 1,99E-11   | 3 |
| H2-Ab1   | 1,62E-15 | 0,32041518 | 2,01E-11   | 3 |
| Lyz1     | 3,31E-15 | 0,64554818 | 4,12E-11   | 3 |
| Clec10a  | 6,12E-15 | 0,4472997  | 7,62E-11   | 3 |
| Txnip    | 6,49E-15 | 0,3496089  | 8,08E-11   | 3 |
| Igf1     | 1,01E-14 | 0,33271721 | 1,26E-10   | 3 |
| Cd163    | 1,36E-14 | 0,29185845 | 1,69E-10   | 3 |
| Zfp36l1  | 1,77E-14 | 0,35238238 | 2,20E-10   | 3 |
| Clec12a  | 2,10E-14 | 0,39025975 | 2,61E-10   | 3 |
| Ehd4     | 2,81E-14 | 0,30709547 | 3,50E-10   | 3 |
| Cd74     | 7,09E-14 | 0,44778952 | 8,83E-10   | 3 |
| Atp2b1   | 1,04E-13 | 0,26630136 | 1,29E-09   | 3 |
| Ccl24    | 1,04E-13 | 0,29064496 | 1,30E-09   | 3 |
| Ap2a2    | 1,72E-13 | 0,38576601 | 2,14E-09   | 3 |
| Mef2c    | 2,10E-13 | 0,28101352 | 2,61E-09   | 3 |
| Maf      | 2,87E-13 | 0,31687276 | 3,58E-09   | 3 |
| Rnd3     | 5,26E-13 | 0,26860528 | 6,54E-09   | 3 |
| Wwp1     | 8,84E-13 | 0,31338148 | 1,10E-08   | 3 |
| Rbpj     | 1,91E-12 | 0,30107087 | 2,37E-08   | 3 |
| Lpl      | 2,08E-12 | 0,37225452 | 2,58E-08   | 3 |
| Snx5     | 3,87E-12 | 0,29159505 | 4,82E-08   | 3 |
| Cltc     | 4,10E-12 | 0,33875801 | 5,10E-08   | 3 |
| Dok2     | 1,18E-11 | 0,26974964 | 1,47E-07   | 3 |
| Tmem176a | 1,59E-11 | 0,36272444 | 1,98E-07   | 3 |
| Ms4a7    | 5,91E-11 | 0,29326819 | 7,36E-07   | 3 |
| Tubb2a   | 1,04E-10 | 0,28490398 | 1,29E-06   | 3 |
| Fosb     | 1,18E-10 | 0,40876969 | 1,47E-06   | 3 |
| Gm42418  | 5,25E-10 | 0,75819329 | 6,54E-06   | 3 |

|          |           |            |            |   |
|----------|-----------|------------|------------|---|
| Atf3     | 7,09E-10  | 0,30866389 | 8,82E-06   | 3 |
| Cd33     | 1,36E-09  | 0,27533175 | 1,70E-05   | 3 |
| Irf2bp2  | 1,70E-09  | 0,31780115 | 2,12E-05   | 3 |
| Dse      | 1,78E-09  | 0,2575986  | 2,22E-05   | 3 |
| mt-Co1   | 2,19E-09  | 0,26073773 | 2,73E-05   | 3 |
| Sdc3     | 2,65E-09  | 0,28875574 | 3,30E-05   | 3 |
| Metrn1   | 3,71E-09  | 0,25302395 | 4,62E-05   | 3 |
| Frm4b    | 4,74E-09  | 0,25742238 | 5,90E-05   | 3 |
| Alox5    | 6,24E-09  | 0,26004691 | 7,77E-05   | 3 |
| Klf4     | 7,95E-09  | 0,35145004 | 9,89E-05   | 3 |
| Hspa1a   | 1,57E-08  | 0,39585882 | 0,0001956  | 3 |
| Wnk1     | 2,49E-08  | 0,27749426 | 0,00030992 | 3 |
| Retn1a   | 2,75E-08  | 0,40618024 | 0,00034191 | 3 |
| Ptms     | 2,94E-08  | 0,25432222 | 0,00036533 | 3 |
| Ppp3ca   | 4,37E-08  | 0,25144234 | 0,00054443 | 3 |
| Ier2     | 1,26E-07  | 0,31705993 | 0,00156284 | 3 |
| Rab7b    | 2,45E-07  | 0,25374715 | 0,00304716 | 3 |
| Nfkbiz   | 4,69E-07  | 0,26033073 | 0,00583122 | 3 |
| Jun      | 1,07E-06  | 0,33881778 | 0,01337654 | 3 |
| Klf2     | 1,49E-06  | 0,32733135 | 0,01848404 | 3 |
| Marcks11 | 0,0010884 | 0,2559517  | 1          | 3 |
| Cstb     | 1,89E-156 | 1,26347546 | 2,35E-152  | 4 |
| Txn1     | 5,67E-119 | 1,03786011 | 7,06E-115  | 4 |
| Bdh2     | 1,97E-109 | 0,6769606  | 2,46E-105  | 4 |
| Spp1     | 6,39E-108 | 2,85652178 | 7,95E-104  | 4 |
| Cav1     | 3,08E-104 | 0,97176661 | 3,83E-100  | 4 |
| Sdc1     | 4,34E-101 | 0,68179294 | 5,41E-97   | 4 |
| Cd44     | 3,69E-96  | 0,93202028 | 4,59E-92   | 4 |
| Kcnn4    | 1,51E-95  | 0,85858847 | 1,88E-91   | 4 |
| Mmp14    | 1,10E-92  | 0,8989359  | 1,38E-88   | 4 |
| Mif      | 1,69E-86  | 1,02334335 | 2,10E-82   | 4 |
| Aprt     | 3,43E-84  | 0,78063742 | 4,27E-80   | 4 |
| Rpl41    | 5,45E-82  | 0,51124133 | 6,78E-78   | 4 |
| S100a10  | 5,68E-81  | 0,67578566 | 7,08E-77   | 4 |
| Pdpn     | 1,22E-75  | 1,23854625 | 1,52E-71   | 4 |
| S100a4   | 5,44E-73  | 0,5422492  | 6,77E-69   | 4 |
| Anxa1    | 1,55E-68  | 0,743627   | 1,93E-64   | 4 |
| Lgals3   | 5,71E-68  | 1,06565479 | 7,10E-64   | 4 |
| Lmna     | 1,46E-66  | 0,73586424 | 1,81E-62   | 4 |
| Arg1     | 1,08E-62  | 1,07753526 | 1,34E-58   | 4 |
| Vim      | 2,20E-58  | 0,605245   | 2,74E-54   | 4 |
| Slc37a2  | 5,50E-58  | 0,6605774  | 6,85E-54   | 4 |
| Nme1     | 3,07E-57  | 0,61116175 | 3,83E-53   | 4 |
| Malt1    | 3,10E-57  | 0,65909809 | 3,85E-53   | 4 |
| Usmg5    | 3,66E-57  | 0,60730133 | 4,55E-53   | 4 |
| Rpl38    | 4,53E-56  | 0,51348015 | 5,64E-52   | 4 |
| Bola2    | 1,99E-52  | 0,72081666 | 2,48E-48   | 4 |
| Rps26    | 8,89E-52  | 0,53071103 | 1,11E-47   | 4 |
| Rai14    | 5,99E-51  | 0,42711508 | 7,46E-47   | 4 |
| Rps8     | 6,64E-49  | 0,45099848 | 8,26E-45   | 4 |
| Clec4d   | 7,91E-49  | 0,80926282 | 9,85E-45   | 4 |
| Rpl37a   | 1,04E-48  | 0,42162109 | 1,29E-44   | 4 |
| Ptma     | 1,54E-48  | 0,47009777 | 1,92E-44   | 4 |
| Anxa2    | 7,40E-48  | 0,5875005  | 9,22E-44   | 4 |
| Fn1      | 9,64E-48  | 0,85194935 | 1,20E-43   | 4 |
| Lgals1   | 1,78E-46  | 0,48534853 | 2,21E-42   | 4 |
| Ran      | 6,98E-46  | 0,63590846 | 8,69E-42   | 4 |
| Tuba1c   | 3,29E-45  | 0,61021347 | 4,09E-41   | 4 |
| Adam8    | 5,33E-45  | 0,56691002 | 6,64E-41   | 4 |
| Rgcc     | 2,35E-44  | 0,97860621 | 2,93E-40   | 4 |
| S100a11  | 2,97E-44  | 0,52325783 | 3,70E-40   | 4 |
| Pgk1     | 3,32E-44  | 0,6405548  | 4,13E-40   | 4 |
| Sema4d   | 5,90E-44  | 0,38553569 | 7,34E-40   | 4 |
| Rps27a   | 2,01E-43  | 0,38499907 | 2,50E-39   | 4 |
| Nrp2     | 1,29E-42  | 0,71292157 | 1,61E-38   | 4 |
| Gapdh    | 3,63E-42  | 0,46617477 | 4,52E-38   | 4 |
| Tpt1     | 5,98E-40  | 0,31431206 | 7,44E-36   | 4 |
| Sdc4     | 2,21E-39  | 0,5506116  | 2,75E-35   | 4 |
| Cycs     | 7,68E-39  | 0,57638018 | 9,56E-35   | 4 |
| Atp5l    | 1,51E-38  | 0,35946538 | 1,88E-34   | 4 |
| Rplp2    | 1,60E-38  | 0,34684232 | 1,99E-34   | 4 |



|               |          |            |          |   |
|---------------|----------|------------|----------|---|
| Nsd2          | 3,20E-38 | 0,40827734 | 3,99E-34 | 4 |
| Rbm3          | 4,21E-37 | 0,39936951 | 5,24E-33 | 4 |
| Rps27l        | 5,76E-37 | 0,50520444 | 7,17E-33 | 4 |
| Sms           | 6,83E-37 | 0,460439   | 8,50E-33 | 4 |
| Hilpda        | 7,72E-37 | 0,69900182 | 9,61E-33 | 4 |
| Cox5a         | 4,30E-36 | 0,49686522 | 5,36E-32 | 4 |
| Nfatc1        | 9,24E-36 | 0,50463728 | 1,15E-31 | 4 |
| Eif4a1        | 1,44E-35 | 0,46342737 | 1,79E-31 | 4 |
| 2010107E04Rik | 1,62E-35 | 0,41679735 | 2,01E-31 | 4 |
| Il1rn         | 1,95E-35 | 0,85861745 | 2,43E-31 | 4 |
| Timp1         | 2,84E-35 | 0,60919302 | 3,54E-31 | 4 |
| Anxa5         | 8,40E-35 | 0,47352483 | 1,05E-30 | 4 |
| Fabp5         | 3,59E-34 | 0,7787408  | 4,46E-30 | 4 |
| Hsp90aa1      | 1,38E-33 | 0,54644636 | 1,72E-29 | 4 |
| Gm10076       | 2,10E-33 | 0,44323353 | 2,62E-29 | 4 |
| Rps3a1        | 2,65E-33 | 0,30955345 | 3,30E-29 | 4 |
| Clec4e        | 5,15E-33 | 0,70731966 | 6,42E-29 | 4 |
| Calm1         | 1,96E-32 | 0,29326642 | 2,44E-28 | 4 |
| Atp5k         | 5,86E-32 | 0,4520259  | 7,30E-28 | 4 |
| Rpl35         | 1,25E-31 | 0,36735319 | 1,55E-27 | 4 |
| Bhlhe40       | 1,60E-31 | 0,52912118 | 1,99E-27 | 4 |
| Atp5e         | 4,03E-31 | 0,38224839 | 5,02E-27 | 4 |
| Ppa1          | 6,09E-31 | 0,38003383 | 7,57E-27 | 4 |
| Atp6v0e       | 9,33E-31 | 0,46355678 | 1,16E-26 | 4 |
| Ybx3          | 1,01E-30 | 0,39826506 | 1,26E-26 | 4 |
| Uqcrb         | 3,17E-30 | 0,36652031 | 3,95E-26 | 4 |
| Acot7         | 1,34E-29 | 0,38531681 | 1,67E-25 | 4 |
| Odc1          | 2,73E-29 | 0,45697121 | 3,40E-25 | 4 |
| Rnf149        | 3,06E-29 | 0,55395906 | 3,81E-25 | 4 |
| Rps2          | 3,17E-29 | 0,41038899 | 3,95E-25 | 4 |
| Mrpl52        | 3,28E-29 | 0,43008546 | 4,08E-25 | 4 |
| Nhp2          | 5,32E-29 | 0,58707556 | 6,63E-25 | 4 |
| Timm13        | 1,48E-28 | 0,46815257 | 1,84E-24 | 4 |
| Rbx1          | 3,01E-28 | 0,37653046 | 3,74E-24 | 4 |
| Pgam1         | 4,16E-28 | 0,53525493 | 5,18E-24 | 4 |
| Timm8a1       | 7,35E-28 | 0,3384572  | 9,15E-24 | 4 |
| Eef1g         | 1,21E-27 | 0,54731723 | 1,51E-23 | 4 |
| Rpl22         | 3,11E-27 | 0,36061389 | 3,86E-23 | 4 |
| Bax           | 3,78E-27 | 0,42508543 | 4,71E-23 | 4 |
| Tcirg1        | 3,79E-27 | 0,43682827 | 4,72E-23 | 4 |
| Snrpe         | 4,39E-27 | 0,46042888 | 5,46E-23 | 4 |
| S100a6        | 2,07E-26 | 0,35517929 | 2,58E-22 | 4 |
| Atp5g1        | 2,30E-26 | 0,49487054 | 2,87E-22 | 4 |
| Cxcl2         | 2,85E-26 | 1,18263495 | 3,55E-22 | 4 |
| Plin2         | 3,18E-26 | 0,66232385 | 3,96E-22 | 4 |
| Rpl39         | 3,28E-26 | 0,28669084 | 4,09E-22 | 4 |
| Tsc22d1       | 3,85E-26 | 0,79212363 | 4,79E-22 | 4 |
| Glrx          | 4,20E-26 | 0,48800461 | 5,23E-22 | 4 |
| Psmb5         | 9,84E-26 | 0,40129642 | 1,23E-21 | 4 |
| Ldha          | 1,20E-25 | 0,42913079 | 1,50E-21 | 4 |
| Traf1         | 1,69E-25 | 0,43776543 | 2,10E-21 | 4 |
| Tpm1          | 1,93E-25 | 0,31344196 | 2,40E-21 | 4 |
| Efhd2         | 3,43E-25 | 0,43019564 | 4,26E-21 | 4 |
| Nfkbia        | 3,61E-25 | 0,48141395 | 4,49E-21 | 4 |
| Eef1e1        | 3,86E-25 | 0,35456876 | 4,80E-21 | 4 |
| Acp5          | 3,88E-25 | 1,29594212 | 4,82E-21 | 4 |
| Npm1          | 4,24E-25 | 0,58341271 | 5,28E-21 | 4 |
| Zfp593        | 4,99E-25 | 0,28594425 | 6,21E-21 | 4 |
| Rps19         | 5,28E-25 | 0,32312216 | 6,57E-21 | 4 |
| mt-Cytb       | 1,48E-24 | 0,30939734 | 1,84E-20 | 4 |
| Gna13         | 1,58E-24 | 0,42902552 | 1,97E-20 | 4 |
| Atox1         | 1,69E-24 | 0,29475164 | 2,10E-20 | 4 |
| Rala          | 2,54E-24 | 0,48906521 | 3,17E-20 | 4 |
| Snhg6         | 3,35E-24 | 0,33918502 | 4,17E-20 | 4 |
| Ranbp1        | 4,60E-24 | 0,5571139  | 5,73E-20 | 4 |
| Cox6b1        | 5,51E-24 | 0,26839836 | 6,85E-20 | 4 |
| Tpi1          | 1,10E-23 | 0,49618785 | 1,37E-19 | 4 |
| Btg1          | 1,25E-23 | 0,55235731 | 1,56E-19 | 4 |
| Ncl           | 1,49E-23 | 0,62171309 | 1,85E-19 | 4 |
| Atpif1        | 1,55E-23 | 0,4380554  | 1,93E-19 | 4 |
| Rps3          | 1,57E-23 | 0,27556729 | 1,96E-19 | 4 |

|          |          |            |          |   |
|----------|----------|------------|----------|---|
| B4galt1  | 3,33E-23 | 0,42904517 | 4,15E-19 | 4 |
| Cox17    | 3,36E-23 | 0,47201345 | 4,18E-19 | 4 |
| Rps10    | 7,82E-23 | 0,30920706 | 9,74E-19 | 4 |
| mt-Nd1   | 1,16E-22 | 0,26585325 | 1,44E-18 | 4 |
| Rpl23    | 1,37E-22 | 0,27238178 | 1,70E-18 | 4 |
| Ak2      | 1,39E-22 | 0,420817   | 1,73E-18 | 4 |
| M6pr     | 2,93E-22 | 0,42645287 | 3,65E-18 | 4 |
| Rnf19b   | 4,80E-22 | 0,35148953 | 5,97E-18 | 4 |
| Pkm      | 5,69E-22 | 0,33177242 | 7,09E-18 | 4 |
| Rps17    | 6,39E-22 | 0,31597534 | 7,96E-18 | 4 |
| Mrps28   | 9,14E-22 | 0,37644593 | 1,14E-17 | 4 |
| Itgav    | 9,47E-22 | 0,40901659 | 1,18E-17 | 4 |
| Ctsk     | 1,30E-21 | 1,40568234 | 1,62E-17 | 4 |
| Mrpl12   | 1,48E-21 | 0,39960754 | 1,85E-17 | 4 |
| Usp50    | 1,80E-21 | 0,37938669 | 2,25E-17 | 4 |
| Rpl36al  | 3,69E-21 | 0,30744856 | 4,59E-17 | 4 |
| Osbpl8   | 4,32E-21 | 0,34303932 | 5,38E-17 | 4 |
| Chchd2   | 4,39E-21 | 0,26265426 | 5,47E-17 | 4 |
| Sec61b   | 7,00E-21 | 0,27686898 | 8,71E-17 | 4 |
| Mdm2     | 7,02E-21 | 0,37081398 | 8,73E-17 | 4 |
| Atp6v1b2 | 7,49E-21 | 0,43968888 | 9,32E-17 | 4 |
| Pno1     | 8,73E-21 | 0,32231555 | 1,09E-16 | 4 |
| Ckap4    | 1,62E-20 | 0,33454041 | 2,02E-16 | 4 |
| Nop58    | 1,84E-20 | 0,3605132  | 2,30E-16 | 4 |
| Mmp19    | 2,08E-20 | 0,55606433 | 2,59E-16 | 4 |
| Lasp1    | 3,09E-20 | 0,3682496  | 3,85E-16 | 4 |
| Mcl1     | 3,97E-20 | 0,47208146 | 4,94E-16 | 4 |
| Pfn1     | 5,19E-20 | 0,27515903 | 6,46E-16 | 4 |
| Psmb6    | 5,26E-20 | 0,32938405 | 6,54E-16 | 4 |
| Eif3j1   | 6,12E-20 | 0,39780672 | 7,62E-16 | 4 |
| Atp5g3   | 8,91E-20 | 0,44408317 | 1,11E-15 | 4 |
| Eif2s2   | 1,83E-19 | 0,37232177 | 2,27E-15 | 4 |
| Rpl36a   | 1,84E-19 | 0,40853255 | 2,29E-15 | 4 |
| Atp6v1e1 | 2,12E-19 | 0,37219002 | 2,63E-15 | 4 |
| Hspd1    | 2,16E-19 | 0,4833923  | 2,69E-15 | 4 |
| Cox7c    | 2,58E-19 | 0,28461915 | 3,21E-15 | 4 |
| Nsun2    | 2,61E-19 | 0,31651465 | 3,25E-15 | 4 |
| Eif6     | 3,06E-19 | 0,42256179 | 3,81E-15 | 4 |
| Hnrnpab  | 3,66E-19 | 0,42103384 | 4,56E-15 | 4 |
| Rps15a   | 5,77E-19 | 0,26726281 | 7,18E-15 | 4 |
| Agpat4   | 9,00E-19 | 0,36174152 | 1,12E-14 | 4 |
| Cox7b    | 1,01E-18 | 0,34050328 | 1,26E-14 | 4 |
| Ifrd1    | 1,19E-18 | 0,5047121  | 1,48E-14 | 4 |
| Hspe1    | 1,27E-18 | 0,52552396 | 1,59E-14 | 4 |
| Uqcrq    | 1,61E-18 | 0,30021024 | 2,01E-14 | 4 |
| Apobec1  | 1,82E-18 | 0,41751217 | 2,27E-14 | 4 |
| Cct3     | 2,91E-18 | 0,42240993 | 3,62E-14 | 4 |
| Adssl1   | 3,52E-18 | 0,36722934 | 4,38E-14 | 4 |
| Set      | 5,52E-18 | 0,47867188 | 6,87E-14 | 4 |
| Agpat5   | 5,72E-18 | 0,28265966 | 7,12E-14 | 4 |
| Snrpf    | 8,76E-18 | 0,35812217 | 1,09E-13 | 4 |
| Snrpd1   | 1,64E-17 | 0,35823946 | 2,04E-13 | 4 |
| Psma3    | 1,64E-17 | 0,31065111 | 2,04E-13 | 4 |
| Naa50    | 1,68E-17 | 0,38000243 | 2,10E-13 | 4 |
| Fam162a  | 1,84E-17 | 0,33028102 | 2,29E-13 | 4 |
| Sod2     | 1,99E-17 | 0,39885215 | 2,47E-13 | 4 |
| Ehd1     | 2,25E-17 | 0,35391012 | 2,80E-13 | 4 |
| Cox7a2   | 2,28E-17 | 0,2959665  | 2,83E-13 | 4 |
| Gnl3     | 2,50E-17 | 0,34328785 | 3,11E-13 | 4 |
| Chchd4   | 2,57E-17 | 0,27480074 | 3,20E-13 | 4 |
| Llph     | 2,72E-17 | 0,34125161 | 3,38E-13 | 4 |
| Avpi1    | 3,61E-17 | 0,42555363 | 4,49E-13 | 4 |
| Uqcr11   | 4,20E-17 | 0,33929417 | 5,22E-13 | 4 |
| Txnrd1   | 4,69E-17 | 0,29406874 | 5,84E-13 | 4 |
| Emc6     | 4,80E-17 | 0,34617554 | 5,97E-13 | 4 |
| Nus1     | 5,08E-17 | 0,30727488 | 6,33E-13 | 4 |
| Atp6v1g1 | 6,47E-17 | 0,3875007  | 8,06E-13 | 4 |
| Azin1    | 9,20E-17 | 0,30681003 | 1,15E-12 | 4 |
| Timm10   | 1,12E-16 | 0,25832016 | 1,39E-12 | 4 |
| Timm17a  | 1,12E-16 | 0,34886742 | 1,39E-12 | 4 |
| Nolc1    | 1,27E-16 | 0,25434171 | 1,58E-12 | 4 |

|          |          |            |          |   |
|----------|----------|------------|----------|---|
| Furin    | 1,60E-16 | 0,39618239 | 2,00E-12 | 4 |
| BC005537 | 2,03E-16 | 0,38612164 | 2,53E-12 | 4 |
| Tomm20   | 2,16E-16 | 0,35337959 | 2,69E-12 | 4 |
| Erh      | 2,72E-16 | 0,3224506  | 3,39E-12 | 4 |
| Rps18    | 3,68E-16 | 0,29089254 | 4,58E-12 | 4 |
| Hif1a    | 3,87E-16 | 0,39072566 | 4,81E-12 | 4 |
| Mdh2     | 3,97E-16 | 0,39023961 | 4,94E-12 | 4 |
| Nip7     | 5,10E-16 | 0,25870092 | 6,34E-12 | 4 |
| Ndufb6   | 5,22E-16 | 0,34631698 | 6,50E-12 | 4 |
| Eif5a    | 1,17E-15 | 0,33477435 | 1,46E-11 | 4 |
| Cav2     | 1,25E-15 | 0,31722963 | 1,56E-11 | 4 |
| Mrto4    | 3,98E-15 | 0,25639238 | 4,96E-11 | 4 |
| Rpl27    | 4,52E-15 | 0,25704638 | 5,62E-11 | 4 |
| Snrpd3   | 4,82E-15 | 0,32067009 | 6,00E-11 | 4 |
| Nudcd2   | 5,16E-15 | 0,25564223 | 6,42E-11 | 4 |
| Snrpd2   | 6,51E-15 | 0,3184982  | 8,11E-11 | 4 |
| Psm14    | 7,32E-15 | 0,34107519 | 9,11E-11 | 4 |
| Cops9    | 7,73E-15 | 0,33018765 | 9,62E-11 | 4 |
| U2af1    | 8,01E-15 | 0,32649365 | 9,97E-11 | 4 |
| Rpl12    | 8,05E-15 | 0,32272465 | 1,00E-10 | 4 |
| Srsf7    | 1,03E-14 | 0,35022486 | 1,28E-10 | 4 |
| Tomm5    | 1,03E-14 | 0,34183616 | 1,29E-10 | 4 |
| Aldoa    | 1,04E-14 | 0,36636569 | 1,29E-10 | 4 |
| C1qbp    | 1,09E-14 | 0,34184862 | 1,35E-10 | 4 |
| Rps21    | 1,09E-14 | 0,30181347 | 1,36E-10 | 4 |
| Polr2k   | 1,14E-14 | 0,32185153 | 1,42E-10 | 4 |
| Gcsh     | 1,25E-14 | 0,28550731 | 1,55E-10 | 4 |
| Clec4n   | 1,29E-14 | 0,61673768 | 1,61E-10 | 4 |
| Plxnd1   | 1,41E-14 | 0,33157224 | 1,75E-10 | 4 |
| Cct8     | 1,85E-14 | 0,36217419 | 2,30E-10 | 4 |
| Jarid2   | 2,03E-14 | 0,28033529 | 2,53E-10 | 4 |
| Pfdn4    | 2,09E-14 | 0,32829056 | 2,61E-10 | 4 |
| Serbp1   | 2,17E-14 | 0,33530957 | 2,70E-10 | 4 |
| Eno1     | 2,35E-14 | 0,32868705 | 2,93E-10 | 4 |
| Apex1    | 2,59E-14 | 0,25870642 | 3,22E-10 | 4 |
| Fam129b  | 2,84E-14 | 0,31024571 | 3,54E-10 | 4 |
| Ube2a    | 3,65E-14 | 0,31313373 | 4,54E-10 | 4 |
| Eif1ax   | 3,75E-14 | 0,32128849 | 4,66E-10 | 4 |
| Cited2   | 4,38E-14 | 0,32750005 | 5,45E-10 | 4 |
| Mrpl54   | 4,67E-14 | 0,31223945 | 5,81E-10 | 4 |
| Higd1a   | 5,66E-14 | 0,37055864 | 7,05E-10 | 4 |
| Ak6      | 6,15E-14 | 0,25128899 | 7,66E-10 | 4 |
| Ufm1     | 7,20E-14 | 0,31493799 | 8,96E-10 | 4 |
| Ywhag    | 7,61E-14 | 0,31134094 | 9,47E-10 | 4 |
| Taf1d    | 9,21E-14 | 0,2568899  | 1,15E-09 | 4 |
| Atp6v1c1 | 9,48E-14 | 0,36054353 | 1,18E-09 | 4 |
| Rps12    | 9,86E-14 | 0,28142955 | 1,23E-09 | 4 |
| Rack1    | 1,04E-13 | 0,28147582 | 1,29E-09 | 4 |
| Gngt2    | 1,21E-13 | 0,26353735 | 1,51E-09 | 4 |
| Anp32b   | 1,22E-13 | 0,32798191 | 1,51E-09 | 4 |
| Fbl      | 1,41E-13 | 0,35634494 | 1,76E-09 | 4 |
| Eif2s1   | 1,49E-13 | 0,30796667 | 1,86E-09 | 4 |
| Itga5    | 2,19E-13 | 0,27407437 | 2,72E-09 | 4 |
| Dnajc2   | 3,04E-13 | 0,26777374 | 3,79E-09 | 4 |
| Actr2    | 3,71E-13 | 0,31172199 | 4,62E-09 | 4 |
| Ndufc1   | 4,43E-13 | 0,34418716 | 5,51E-09 | 4 |
| Esd      | 4,49E-13 | 0,33181702 | 5,58E-09 | 4 |
| Nop56    | 5,23E-13 | 0,25392191 | 6,52E-09 | 4 |
| Tubb4b   | 5,55E-13 | 0,27349936 | 6,91E-09 | 4 |
| Rpl5     | 6,36E-13 | 0,2647515  | 7,92E-09 | 4 |
| Ndufab1  | 6,47E-13 | 0,33517127 | 8,05E-09 | 4 |
| Tubb6    | 1,00E-12 | 0,32843553 | 1,25E-08 | 4 |
| Ube2l3   | 1,16E-12 | 0,26973073 | 1,45E-08 | 4 |
| Ctsl     | 1,56E-12 | 0,74311785 | 1,95E-08 | 4 |
| Psm7     | 1,76E-12 | 0,31845426 | 2,20E-08 | 4 |
| Ndufc2   | 1,79E-12 | 0,3087451  | 2,23E-08 | 4 |
| Mrps14   | 1,84E-12 | 0,27975167 | 2,28E-08 | 4 |
| Tomm40   | 3,42E-12 | 0,25205336 | 4,26E-08 | 4 |
| Hsp90ab1 | 3,74E-12 | 0,27884315 | 4,66E-08 | 4 |
| Hnrnpa1  | 4,15E-12 | 0,32690512 | 5,16E-08 | 4 |
| Dtymk    | 4,81E-12 | 0,2805494  | 5,99E-08 | 4 |

|               |            |            |            |   |
|---------------|------------|------------|------------|---|
| Cct2          | 4,82E-12   | 0,28565798 | 6,00E-08   | 4 |
| Ptbp3         | 5,62E-12   | 0,30080533 | 6,99E-08   | 4 |
| Rplp1         | 8,58E-12   | 0,2510894  | 1,07E-07   | 4 |
| Lpl           | 9,12E-12   | 0,55866302 | 1,14E-07   | 4 |
| Atp5o         | 9,35E-12   | 0,29905812 | 1,16E-07   | 4 |
| Map4k4        | 1,04E-11   | 0,28936172 | 1,30E-07   | 4 |
| Ebna1bp2      | 1,27E-11   | 0,28592024 | 1,58E-07   | 4 |
| Eif4g2        | 1,36E-11   | 0,26712643 | 1,70E-07   | 4 |
| Hdgf          | 1,51E-11   | 0,25442094 | 1,88E-07   | 4 |
| Ybx1          | 1,75E-11   | 0,29737463 | 2,18E-07   | 4 |
| Npm3          | 1,88E-11   | 0,28360692 | 2,35E-07   | 4 |
| Mrpl20        | 2,03E-11   | 0,29780009 | 2,53E-07   | 4 |
| Tnfaip3       | 2,09E-11   | 0,46697004 | 2,60E-07   | 4 |
| G3bp1         | 3,40E-11   | 0,29537589 | 4,23E-07   | 4 |
| Impdh2        | 3,91E-11   | 0,32637112 | 4,86E-07   | 4 |
| Hspa9         | 4,23E-11   | 0,28070567 | 5,26E-07   | 4 |
| Snu13         | 5,64E-11   | 0,31993757 | 7,02E-07   | 4 |
| Pik3r5        | 5,73E-11   | 0,25887413 | 7,13E-07   | 4 |
| Pa2g4         | 5,84E-11   | 0,36080565 | 7,26E-07   | 4 |
| Uqcr10        | 7,41E-11   | 0,3001181  | 9,22E-07   | 4 |
| Romo1         | 1,48E-10   | 0,27043795 | 1,84E-06   | 4 |
| Psm6          | 1,50E-10   | 0,31456927 | 1,87E-06   | 4 |
| Banf1         | 1,88E-10   | 0,26577061 | 2,35E-06   | 4 |
| Tctex1d2      | 2,12E-10   | 0,29204547 | 2,64E-06   | 4 |
| Magoh         | 2,75E-10   | 0,2536404  | 3,42E-06   | 4 |
| Slirp         | 3,70E-10   | 0,2977527  | 4,60E-06   | 4 |
| Ywhaz         | 4,54E-10   | 0,28619539 | 5,66E-06   | 4 |
| Lfng          | 6,49E-10   | 0,26314528 | 8,08E-06   | 4 |
| Ppp2ca        | 6,93E-10   | 0,27297105 | 8,62E-06   | 4 |
| Pcbp1         | 7,62E-10   | 0,26713503 | 9,49E-06   | 4 |
| Polr2l        | 8,69E-10   | 0,29300083 | 1,08E-05   | 4 |
| Hnrnpa0       | 9,36E-10   | 0,25757135 | 1,16E-05   | 4 |
| mt-Nd3        | 1,00E-09   | 0,30197647 | 1,24E-05   | 4 |
| 1810022K09Rik | 1,02E-09   | 0,27905562 | 1,27E-05   | 4 |
| Srsf3         | 2,05E-09   | 0,2583567  | 2,56E-05   | 4 |
| Fcf1          | 2,20E-09   | 0,25664767 | 2,74E-05   | 4 |
| Sfpq          | 2,79E-09   | 0,26387049 | 3,47E-05   | 4 |
| Ddt           | 2,86E-09   | 0,39589544 | 3,56E-05   | 4 |
| Id2           | 3,60E-09   | 0,47917515 | 4,49E-05   | 4 |
| Prmt1         | 4,56E-09   | 0,25592048 | 5,68E-05   | 4 |
| Lsm7          | 5,02E-09   | 0,28364623 | 6,25E-05   | 4 |
| Sod1          | 7,37E-09   | 0,29187466 | 9,18E-05   | 4 |
| Atp6v1a       | 7,74E-09   | 0,30431539 | 9,64E-05   | 4 |
| Mrpl23        | 9,24E-09   | 0,2605118  | 0,00011497 | 4 |
| Ndufs6        | 2,98E-08   | 0,26273084 | 0,0003703  | 4 |
| Rpl22l1       | 3,56E-08   | 0,2769638  | 0,00044279 | 4 |
| Nceh1         | 4,36E-08   | 0,27517429 | 0,00054241 | 4 |
| Tnfaip2       | 4,39E-08   | 0,31706885 | 0,00054584 | 4 |
| Tcp1          | 1,66E-07   | 0,25631537 | 0,00206054 | 4 |
| Nop10         | 2,61E-07   | 0,27889355 | 0,00325065 | 4 |
| Gpr137b       | 3,08E-07   | 0,26678935 | 0,00383248 | 4 |
| Arf6          | 3,31E-07   | 0,25593554 | 0,00411851 | 4 |
| mt-Atp8       | 3,45E-07   | 0,25294059 | 0,00429862 | 4 |
| Slc43a2       | 5,58E-07   | 0,25800196 | 0,00694463 | 4 |
| Phb2          | 1,47E-06   | 0,25305833 | 0,01835255 | 4 |
| Cxcl16        | 1,95E-06   | 0,26593486 | 0,02426549 | 4 |
| Gm42418       | 3,37E-06   | 0,27139357 | 0,04197913 | 4 |
| Ezr           | 1,11E-05   | 0,28854069 | 0,13790488 | 4 |
| Sqstm1        | 8,40E-05   | 0,26497132 | 1          | 4 |
| Sgk1          | 0,00074782 | 0,26738793 | 1          | 4 |
| Atp6v1d       | 0,00092824 | 0,2767944  | 1          | 4 |
| Ms4a7         | 0,00170499 | 0,4653073  | 1          | 4 |
| Klrd1         | 4,20E-272  | 1,47393539 | 5,23E-268  | 5 |
| H2-DMb2       | 3,33E-211  | 1,18916625 | 4,15E-207  | 5 |
| Cd209a        | 1,86E-193  | 2,13943107 | 2,31E-189  | 5 |
| Klrk1         | 2,61E-184  | 0,74059925 | 3,24E-180  | 5 |
| Klrb1b        | 1,33E-182  | 0,87607303 | 1,66E-178  | 5 |
| Gpr171        | 1,03E-168  | 0,95097072 | 1,28E-164  | 5 |
| H2-Eb1        | 1,61E-160  | 2,37215961 | 2,00E-156  | 5 |
| Jaml          | 5,51E-151  | 0,70409082 | 6,86E-147  | 5 |
| H2-Aa         | 1,91E-146  | 2,31145539 | 2,38E-142  | 5 |

|               |           |            |           |   |
|---------------|-----------|------------|-----------|---|
| Itgax         | 5,89E-143 | 0,74813853 | 7,33E-139 | 5 |
| H2-DMb1       | 1,81E-139 | 1,66810813 | 2,25E-135 | 5 |
| H2-Ab1        | 6,76E-134 | 2,41457207 | 8,41E-130 | 5 |
| Cd74          | 2,45E-131 | 2,31154351 | 3,05E-127 | 5 |
| H2-DMa        | 5,27E-127 | 1,57320584 | 6,56E-123 | 5 |
| Plscr1        | 1,30E-112 | 0,7782818  | 1,62E-108 | 5 |
| Klra17        | 7,58E-110 | 0,64829184 | 9,43E-106 | 5 |
| Flt3          | 7,45E-102 | 0,52776962 | 9,27E-98  | 5 |
| Olfm1         | 6,92E-90  | 0,75815576 | 8,61E-86  | 5 |
| Il1r2         | 1,74E-87  | 1,37855621 | 2,17E-83  | 5 |
| Spint1        | 1,37E-81  | 0,58412276 | 1,71E-77  | 5 |
| Syng2         | 2,32E-80  | 1,30566591 | 2,89E-76  | 5 |
| Napsa         | 8,41E-80  | 1,05476894 | 1,05E-75  | 5 |
| Clec4b1       | 3,30E-78  | 0,90976658 | 4,10E-74  | 5 |
| Slamf7        | 1,24E-75  | 0,65913769 | 1,54E-71  | 5 |
| Plbd1         | 1,88E-75  | 1,03209222 | 2,34E-71  | 5 |
| Rnase6        | 8,04E-74  | 0,63875158 | 1,00E-69  | 5 |
| Lsp1          | 2,39E-71  | 1,00479994 | 2,97E-67  | 5 |
| Mgl2          | 1,12E-64  | 1,49767467 | 1,40E-60  | 5 |
| Itgb7         | 1,57E-59  | 0,76285815 | 1,96E-55  | 5 |
| Cd52          | 3,74E-58  | 0,83340698 | 4,66E-54  | 5 |
| Selplg        | 5,73E-56  | 0,88014099 | 7,14E-52  | 5 |
| H2afz         | 1,80E-55  | 0,85879872 | 2,25E-51  | 5 |
| Gm2a          | 7,85E-55  | 0,86517379 | 9,77E-51  | 5 |
| Sub1          | 9,39E-53  | 0,66609124 | 1,17E-48  | 5 |
| Tmem176a      | 3,95E-51  | 0,95133166 | 4,91E-47  | 5 |
| Tspan13       | 3,92E-50  | 0,84477254 | 4,88E-46  | 5 |
| Cd24a         | 2,30E-49  | 0,67329994 | 2,86E-45  | 5 |
| 1700025G04Rik | 3,32E-49  | 0,47444136 | 4,13E-45  | 5 |
| Tnip3         | 9,57E-49  | 0,74923083 | 1,19E-44  | 5 |
| Bcl2a1d       | 1,98E-48  | 0,74096504 | 2,47E-44  | 5 |
| Ifitm1        | 4,85E-46  | 2,31574594 | 6,04E-42  | 5 |
| Ctsh          | 1,11E-45  | 0,71494952 | 1,38E-41  | 5 |
| Clec10a       | 4,55E-43  | 0,80559792 | 5,67E-39  | 5 |
| Traf1         | 3,53E-42  | 0,78470858 | 4,39E-38  | 5 |
| AA467197      | 1,54E-41  | 1,16637911 | 1,92E-37  | 5 |
| S100a11       | 2,71E-40  | 0,607607   | 3,38E-36  | 5 |
| Rin3          | 4,19E-40  | 0,39660539 | 5,21E-36  | 5 |
| Cd72          | 2,27E-38  | 0,86236124 | 2,83E-34  | 5 |
| Psmb8         | 1,07E-36  | 0,59280156 | 1,33E-32  | 5 |
| Atox1         | 9,14E-36  | 0,5521211  | 1,14E-31  | 5 |
| Cbfa2t3       | 2,11E-35  | 0,46634789 | 2,62E-31  | 5 |
| Cd209d        | 2,78E-35  | 0,8680263  | 3,46E-31  | 5 |
| Grk3          | 4,62E-33  | 0,45526068 | 5,75E-29  | 5 |
| Bri3bp        | 5,23E-33  | 0,40845801 | 6,51E-29  | 5 |
| Cfp           | 7,87E-33  | 0,66395821 | 9,79E-29  | 5 |
| Cytip         | 1,20E-32  | 0,51138942 | 1,50E-28  | 5 |
| Ramp1         | 1,32E-32  | 0,51383076 | 1,65E-28  | 5 |
| Casp6         | 2,18E-32  | 0,58178672 | 2,71E-28  | 5 |
| Fgl2          | 2,30E-31  | 0,39860022 | 2,86E-27  | 5 |
| Rps11         | 2,69E-31  | 0,36585284 | 3,35E-27  | 5 |
| Batf3         | 3,51E-31  | 0,38153346 | 4,36E-27  | 5 |
| Rpl14         | 5,48E-31  | 0,36185575 | 6,82E-27  | 5 |
| Rpsa          | 1,52E-30  | 0,40950255 | 1,89E-26  | 5 |
| Lsr           | 1,75E-30  | 0,48265795 | 2,18E-26  | 5 |
| Eva1b         | 3,14E-30  | 0,39474762 | 3,90E-26  | 5 |
| Naga          | 4,17E-30  | 0,54103267 | 5,19E-26  | 5 |
| Fam129a       | 6,73E-30  | 0,42004464 | 8,38E-26  | 5 |
| Rps7          | 1,80E-29  | 0,36493001 | 2,24E-25  | 5 |
| 4930523C07Rik | 3,90E-29  | 0,53909706 | 4,85E-25  | 5 |
| Rpl13         | 5,21E-29  | 0,35289005 | 6,49E-25  | 5 |
| Mpc1          | 1,47E-28  | 0,57644309 | 1,83E-24  | 5 |
| Cnn2          | 1,53E-28  | 0,66799432 | 1,90E-24  | 5 |
| Rps6          | 3,21E-28  | 0,37846677 | 4,00E-24  | 5 |
| Rps4x         | 5,52E-28  | 0,31909441 | 6,87E-24  | 5 |
| Ckb           | 6,70E-28  | 0,68810069 | 8,34E-24  | 5 |
| Naaa          | 2,30E-27  | 0,75762189 | 2,86E-23  | 5 |
| Limd2         | 3,30E-27  | 0,61004853 | 4,11E-23  | 5 |
| Il2rg         | 2,53E-26  | 0,47443342 | 3,15E-22  | 5 |
| Vrk1          | 4,01E-26  | 0,50537506 | 4,99E-22  | 5 |
| Ltb4r1        | 4,57E-26  | 0,48640265 | 5,69E-22  | 5 |

|          |          |            |          |   |
|----------|----------|------------|----------|---|
| Zyx      | 7,55E-26 | 0,54377677 | 9,39E-22 | 5 |
| Rplp0    | 2,16E-25 | 0,34202546 | 2,69E-21 | 5 |
| Tmsb10   | 4,44E-25 | 0,37383466 | 5,53E-21 | 5 |
| Fh1      | 7,46E-25 | 0,48029285 | 9,29E-21 | 5 |
| Glipr2   | 1,07E-24 | 0,40458268 | 1,33E-20 | 5 |
| Ccnd1    | 4,67E-24 | 0,44286855 | 5,82E-20 | 5 |
| Coro1a   | 5,05E-24 | 0,42223818 | 6,29E-20 | 5 |
| Rps19    | 5,34E-24 | 0,29882603 | 6,64E-20 | 5 |
| Rps18    | 1,15E-23 | 0,31087962 | 1,43E-19 | 5 |
| Tmem176b | 3,93E-23 | 0,51561025 | 4,89E-19 | 5 |
| Jak2     | 3,40E-22 | 0,28388761 | 4,23E-18 | 5 |
| Acot7    | 4,28E-22 | 0,38416852 | 5,32E-18 | 5 |
| H2afy    | 5,46E-22 | 0,48251693 | 6,80E-18 | 5 |
| Rogdi    | 6,43E-22 | 0,47868889 | 8,00E-18 | 5 |
| Rpl32    | 1,15E-21 | 0,2748687  | 1,44E-17 | 5 |
| Actg1    | 3,59E-21 | 0,28019318 | 4,46E-17 | 5 |
| Lmnb1    | 5,93E-21 | 0,41191161 | 7,38E-17 | 5 |
| Ccdc88a  | 9,72E-21 | 0,48729973 | 1,21E-16 | 5 |
| Myo1g    | 1,07E-20 | 0,39643803 | 1,33E-16 | 5 |
| Rpl17    | 1,46E-20 | 0,29956167 | 1,82E-16 | 5 |
| Rpl4     | 3,67E-20 | 0,33877368 | 4,57E-16 | 5 |
| Prcp     | 6,21E-20 | 0,40732547 | 7,73E-16 | 5 |
| Cd47     | 7,40E-20 | 0,39727569 | 9,21E-16 | 5 |
| Ptprc    | 2,70E-19 | 0,44956042 | 3,37E-15 | 5 |
| Dapp1    | 2,88E-19 | 0,36284511 | 3,58E-15 | 5 |
| Avpi1    | 3,97E-19 | 0,56477659 | 4,94E-15 | 5 |
| Btg2     | 4,06E-19 | 0,52088076 | 5,05E-15 | 5 |
| Bhlhe40  | 2,31E-18 | 0,48162142 | 2,88E-14 | 5 |
| Rpl15    | 3,45E-18 | 0,28220384 | 4,29E-14 | 5 |
| Ndufa6   | 4,06E-18 | 0,4284968  | 5,05E-14 | 5 |
| Ccr2     | 4,50E-18 | 0,30720151 | 5,60E-14 | 5 |
| Rps16    | 4,85E-18 | 0,2504393  | 6,04E-14 | 5 |
| Timp1    | 6,69E-18 | 0,46086328 | 8,33E-14 | 5 |
| Ywhah    | 1,39E-17 | 0,41438325 | 1,73E-13 | 5 |
| Rpl39    | 3,91E-17 | 0,25888431 | 4,86E-13 | 5 |
| Emb      | 4,66E-17 | 0,31801719 | 5,80E-13 | 5 |
| Tap1     | 9,00E-17 | 0,34763922 | 1,12E-12 | 5 |
| Pmvk     | 1,52E-16 | 0,39859409 | 1,89E-12 | 5 |
| St3gal4  | 1,59E-16 | 0,33482868 | 1,98E-12 | 5 |
| Unc119   | 2,05E-16 | 0,28441922 | 2,55E-12 | 5 |
| Rara     | 9,23E-16 | 0,25415547 | 1,15E-11 | 5 |
| Ccnd3    | 1,07E-15 | 0,43426468 | 1,33E-11 | 5 |
| Dpysl2   | 1,24E-15 | 0,39797183 | 1,54E-11 | 5 |
| Sec61b   | 2,47E-15 | 0,39158179 | 3,07E-11 | 5 |
| Tmem173  | 3,10E-15 | 0,36845449 | 3,86E-11 | 5 |
| Etv3     | 1,21E-14 | 0,2802628  | 1,51E-10 | 5 |
| Prkar2a  | 1,26E-14 | 0,26848081 | 1,56E-10 | 5 |
| Rel      | 1,68E-14 | 0,42517239 | 2,09E-10 | 5 |
| Eef1g    | 2,06E-14 | 0,29334979 | 2,57E-10 | 5 |
| Hsd17b10 | 4,54E-14 | 0,40957031 | 5,65E-10 | 5 |
| Slamf9   | 1,12E-13 | 0,38801203 | 1,40E-09 | 5 |
| Pfkip    | 1,86E-13 | 0,41227114 | 2,32E-09 | 5 |
| Pim1     | 2,39E-13 | 0,30482862 | 2,97E-09 | 5 |
| Tes      | 2,75E-13 | 0,27465144 | 3,42E-09 | 5 |
| Csrnp1   | 3,38E-13 | 0,36910126 | 4,21E-09 | 5 |
| Cd300a   | 4,42E-13 | 0,40105596 | 5,50E-09 | 5 |
| Fabp5    | 4,60E-13 | 0,96949256 | 5,73E-09 | 5 |
| Pak1     | 4,81E-13 | 0,26360276 | 5,99E-09 | 5 |
| Cyp4f16  | 5,44E-13 | 0,32051275 | 6,77E-09 | 5 |
| Trappc5  | 7,25E-13 | 0,38181418 | 9,03E-09 | 5 |
| Tmem123  | 7,83E-13 | 0,51226881 | 9,75E-09 | 5 |
| Lmo4     | 1,30E-12 | 0,37465961 | 1,61E-08 | 5 |
| Psme1    | 1,53E-12 | 0,32241559 | 1,91E-08 | 5 |
| I11b     | 2,00E-12 | 0,40481667 | 2,48E-08 | 5 |
| Uvrag    | 6,33E-12 | 0,26475418 | 7,88E-08 | 5 |
| Fgr      | 1,04E-11 | 0,28297311 | 1,29E-07 | 5 |
| Gm9493   | 1,11E-11 | 0,33002311 | 1,39E-07 | 5 |
| Eif3f    | 1,68E-11 | 0,30291978 | 2,10E-07 | 5 |
| Vasp     | 1,76E-11 | 0,34334343 | 2,19E-07 | 5 |
| Dennd4a  | 2,84E-11 | 0,43082351 | 3,54E-07 | 5 |
| Gpr132   | 3,08E-11 | 0,25846432 | 3,83E-07 | 5 |

|          |            |            |            |   |
|----------|------------|------------|------------|---|
| Bloc1s2  | 3,69E-11   | 0,27825039 | 4,59E-07   | 5 |
| Csf2rb   | 3,70E-11   | 0,2800113  | 4,61E-07   | 5 |
| Nr4a2    | 7,52E-11   | 0,34511514 | 9,35E-07   | 5 |
| Dbnl     | 2,11E-10   | 0,29207348 | 2,63E-06   | 5 |
| Sdf2l1   | 2,15E-10   | 0,3849343  | 2,67E-06   | 5 |
| Myd88    | 2,63E-10   | 0,27454816 | 3,27E-06   | 5 |
| Med30    | 2,82E-10   | 0,34630805 | 3,51E-06   | 5 |
| Fbl      | 3,65E-10   | 0,30449302 | 4,54E-06   | 5 |
| Lactb    | 3,84E-10   | 0,26817052 | 4,78E-06   | 5 |
| Atp5f1   | 3,95E-10   | 0,26878994 | 4,91E-06   | 5 |
| Psmb9    | 5,90E-10   | 0,25655977 | 7,34E-06   | 5 |
| H13      | 6,38E-10   | 0,29938305 | 7,94E-06   | 5 |
| Tax1bp3  | 7,77E-10   | 0,29539544 | 9,67E-06   | 5 |
| Ms4a4c   | 1,20E-09   | 0,33455853 | 1,49E-05   | 5 |
| Ass1     | 1,39E-09   | 0,32113311 | 1,73E-05   | 5 |
| Pkib     | 1,65E-09   | 0,27527635 | 2,05E-05   | 5 |
| Eef1b2   | 1,81E-09   | 0,2775582  | 2,25E-05   | 5 |
| Scand1   | 1,87E-09   | 0,26041031 | 2,33E-05   | 5 |
| Id2      | 4,55E-09   | 0,29593082 | 5,66E-05   | 5 |
| Ddost    | 1,08E-08   | 0,2754836  | 0,0001339  | 5 |
| Sri      | 6,99E-08   | 0,25060387 | 0,00087038 | 5 |
| Fdps     | 7,12E-08   | 0,30746456 | 0,00088633 | 5 |
| Ifngr1   | 1,01E-07   | 0,30861483 | 0,00125126 | 5 |
| BC028528 | 6,61E-07   | 0,28948968 | 0,00822535 | 5 |
| Cd86     | 6,74E-07   | 0,3144225  | 0,00839301 | 5 |
| Cdkn2d   | 1,79E-06   | 0,2615734  | 0,02231487 | 5 |
| Tuba1a   | 2,30E-06   | 0,30757054 | 0,02856583 | 5 |
| Rgs1     | 2,88E-06   | 0,29912357 | 0,03579181 | 5 |
| Cxcl16   | 5,80E-06   | 0,35669601 | 0,07214489 | 5 |
| B4galnt1 | 2,24E-05   | 0,26504585 | 0,27823023 | 5 |
| Hspa1a   | 3,33E-05   | 0,37030493 | 0,41495067 | 5 |
| Pdlim1   | 0,00017646 | 0,2569539  | 1          | 5 |
| Clec4n   | 0,00304207 | 0,28891222 | 1          | 5 |
| Marcksl1 | 0,00423458 | 0,26209577 | 1          | 5 |
| Ifitm2   | 0,00501174 | 0,35847542 | 1          | 5 |
| Birc5    | 0          | 1,87523545 | 0          | 6 |
| Ube2c    | 0          | 1,78126033 | 0          | 6 |
| Pclaf    | 0          | 1,71568189 | 0          | 6 |
| Cenpf    | 0          | 1,42538755 | 0          | 6 |
| Cdk1     | 0          | 1,3920838  | 0          | 6 |
| Nusap1   | 0          | 1,25616926 | 0          | 6 |
| Pbk      | 0          | 1,16434674 | 0          | 6 |
| Ccna2    | 0          | 1,1592826  | 0          | 6 |
| Prc1     | 0          | 1,07255917 | 0          | 6 |
| Top2a    | 7,11E-299  | 1,91678494 | 8,85E-295  | 6 |
| Spc25    | 2,59E-296  | 0,95384775 | 3,23E-292  | 6 |
| Ccnb1    | 2,90E-292  | 0,91258907 | 3,61E-288  | 6 |
| Hmmr     | 1,52E-288  | 0,73433171 | 1,89E-284  | 6 |
| Tpx2     | 5,46E-288  | 0,86940293 | 6,79E-284  | 6 |
| Cdca3    | 2,49E-285  | 1,22309946 | 3,10E-281  | 6 |
| Aspm     | 8,69E-278  | 0,74443158 | 1,08E-273  | 6 |
| Rrm2     | 2,32E-277  | 1,11564595 | 2,89E-273  | 6 |
| Spc24    | 7,56E-272  | 1,09074488 | 9,41E-268  | 6 |
| Kif11    | 5,83E-266  | 0,63731869 | 7,26E-262  | 6 |
| Mki67    | 3,37E-255  | 1,42141064 | 4,19E-251  | 6 |
| Ncapg    | 6,86E-246  | 0,58540011 | 8,54E-242  | 6 |
| Knf1     | 4,44E-244  | 0,63909192 | 5,53E-240  | 6 |
| Sgo1     | 1,24E-235  | 0,68560459 | 1,54E-231  | 6 |
| Tk1      | 8,35E-234  | 1,15458787 | 1,04E-229  | 6 |
| Cdc20    | 2,81E-232  | 0,89259737 | 3,50E-228  | 6 |
| Aurkb    | 3,41E-230  | 0,80509716 | 4,25E-226  | 6 |
| Kifc1    | 1,13E-229  | 0,5158028  | 1,40E-225  | 6 |
| Kif15    | 2,56E-225  | 0,607307   | 3,18E-221  | 6 |
| Cdca2    | 4,16E-219  | 0,43212315 | 5,18E-215  | 6 |
| Esco2    | 1,22E-216  | 0,51082802 | 1,51E-212  | 6 |
| Plk1     | 1,68E-216  | 0,48161118 | 2,09E-212  | 6 |
| Ckap2l   | 3,48E-214  | 0,73006949 | 4,33E-210  | 6 |
| Cenpe    | 3,91E-213  | 0,74279358 | 4,86E-209  | 6 |
| Kif20a   | 1,38E-210  | 0,54030361 | 1,71E-206  | 6 |
| Kif22    | 7,55E-206  | 0,6511718  | 9,40E-202  | 6 |
| Tacc3    | 4,14E-202  | 0,92529919 | 5,15E-198  | 6 |

|               |           |            |           |   |
|---------------|-----------|------------|-----------|---|
| Hist1h1b      | 2,81E-198 | 1,19504562 | 3,49E-194 | 6 |
| Racgap1       | 1,42E-197 | 1,16317936 | 1,77E-193 | 6 |
| Cenpm         | 9,37E-193 | 0,53253289 | 1,17E-188 | 6 |
| Ccnb2         | 1,30E-190 | 1,12062878 | 1,61E-186 | 6 |
| Shcbp1        | 8,29E-190 | 0,45890864 | 1,03E-185 | 6 |
| Cdca8         | 1,82E-189 | 1,10486565 | 2,26E-185 | 6 |
| Mad2l1        | 6,10E-189 | 0,64157333 | 7,60E-185 | 6 |
| Bub1b         | 1,71E-187 | 0,73939256 | 2,12E-183 | 6 |
| Nuf2          | 7,28E-187 | 0,43866927 | 9,06E-183 | 6 |
| Cep55         | 1,65E-186 | 0,53746981 | 2,05E-182 | 6 |
| Prr11         | 4,68E-185 | 0,37970913 | 5,82E-181 | 6 |
| Ska1          | 3,04E-184 | 0,42736316 | 3,79E-180 | 6 |
| Fbxo5         | 1,53E-183 | 0,47324085 | 1,91E-179 | 6 |
| Lockd         | 1,86E-182 | 0,74865426 | 2,32E-178 | 6 |
| Rad51ap1      | 7,38E-180 | 0,50558405 | 9,18E-176 | 6 |
| Cenpw         | 1,12E-174 | 0,90833536 | 1,39E-170 | 6 |
| Bub1          | 1,81E-173 | 0,45154077 | 2,25E-169 | 6 |
| Ckap2         | 2,82E-172 | 0,64668911 | 3,51E-168 | 6 |
| Melk          | 1,03E-171 | 0,36883821 | 1,28E-167 | 6 |
| Hist1h2ae     | 2,81E-170 | 1,40965752 | 3,50E-166 | 6 |
| Kks1b         | 2,62E-165 | 1,33387139 | 3,26E-161 | 6 |
| Pimreg        | 3,16E-165 | 0,46360912 | 3,94E-161 | 6 |
| Diaph3        | 6,26E-165 | 0,56347309 | 7,79E-161 | 6 |
| Stmn1         | 3,76E-161 | 2,61334562 | 4,67E-157 | 6 |
| Mxd3          | 1,03E-160 | 0,40790887 | 1,29E-156 | 6 |
| Cenph         | 2,75E-157 | 0,4593124  | 3,42E-153 | 6 |
| Dlgap5        | 2,93E-157 | 0,40128579 | 3,65E-153 | 6 |
| Hist1h2ap     | 2,98E-157 | 2,30403465 | 3,70E-153 | 6 |
| Kif4          | 1,30E-155 | 0,38190287 | 1,62E-151 | 6 |
| Aurka         | 5,09E-155 | 0,54079453 | 6,33E-151 | 6 |
| Clspn         | 7,78E-155 | 0,53390593 | 9,69E-151 | 6 |
| Asf1b         | 3,61E-150 | 0,77848347 | 4,49E-146 | 6 |
| Ncapd2        | 5,30E-149 | 0,66371762 | 6,60E-145 | 6 |
| Sgo2a         | 2,65E-147 | 0,50123522 | 3,30E-143 | 6 |
| Ndc80         | 8,83E-147 | 0,46384629 | 1,10E-142 | 6 |
| Anln          | 1,30E-144 | 0,75210068 | 1,62E-140 | 6 |
| Knstrn        | 1,11E-136 | 0,58652045 | 1,38E-132 | 6 |
| Incenp        | 1,98E-127 | 0,71800574 | 2,46E-123 | 6 |
| Cdkn3         | 1,63E-126 | 0,59283582 | 2,03E-122 | 6 |
| Smc2          | 6,69E-126 | 1,14774094 | 8,33E-122 | 6 |
| Mybl2         | 1,43E-124 | 0,33887487 | 1,78E-120 | 6 |
| Cenpq         | 3,11E-121 | 0,61420472 | 3,87E-117 | 6 |
| Uhrf1         | 8,61E-119 | 0,53814941 | 1,07E-114 | 6 |
| Lrr1          | 2,14E-117 | 0,28525609 | 2,66E-113 | 6 |
| Pkmyt1        | 2,31E-117 | 0,41798127 | 2,87E-113 | 6 |
| Ccne2         | 2,90E-116 | 0,51729747 | 3,61E-112 | 6 |
| Rrm1          | 7,82E-116 | 1,04452415 | 9,73E-112 | 6 |
| Tyms          | 2,45E-113 | 0,80530624 | 3,04E-109 | 6 |
| Dut           | 7,39E-111 | 0,88819775 | 9,19E-107 | 6 |
| Rad51         | 3,93E-109 | 0,40233465 | 4,89E-105 | 6 |
| Mis18bp1      | 7,80E-105 | 0,43360629 | 9,70E-101 | 6 |
| Mcm5          | 4,80E-103 | 0,60219707 | 5,98E-99  | 6 |
| Ube2t         | 4,97E-103 | 0,5834668  | 6,18E-99  | 6 |
| Cdc45         | 1,98E-102 | 0,29700758 | 2,46E-98  | 6 |
| Cks2          | 1,07E-99  | 1,23894185 | 1,33E-95  | 6 |
| Kif20b        | 6,55E-99  | 0,37480888 | 8,15E-95  | 6 |
| Rad54l        | 1,04E-98  | 0,32110179 | 1,29E-94  | 6 |
| Dnph1         | 1,06E-97  | 0,4563429  | 1,32E-93  | 6 |
| C330027C09Rik | 3,37E-96  | 0,44475653 | 4,20E-92  | 6 |
| Kif23         | 1,63E-95  | 0,91608696 | 2,03E-91  | 6 |
| Trim59        | 7,35E-95  | 0,43752952 | 9,15E-91  | 6 |
| Hells         | 1,93E-89  | 0,6480953  | 2,41E-85  | 6 |
| Mcm7          | 4,29E-86  | 0,6732909  | 5,34E-82  | 6 |
| Hmgb3         | 1,49E-83  | 0,6779377  | 1,86E-79  | 6 |
| Ncaph         | 6,72E-83  | 0,39485818 | 8,36E-79  | 6 |
| Cenpk         | 6,01E-81  | 0,32681626 | 7,48E-77  | 6 |
| Gmnn          | 9,69E-81  | 0,99662735 | 1,21E-76  | 6 |
| Atad2         | 2,34E-80  | 0,70483563 | 2,91E-76  | 6 |
| Figl1         | 4,79E-77  | 0,34735039 | 5,96E-73  | 6 |
| Mcm6          | 1,18E-76  | 0,99341848 | 1,46E-72  | 6 |
| Dhfr          | 9,04E-75  | 0,39221582 | 1,13E-70  | 6 |



|           |          |            |          |   |
|-----------|----------|------------|----------|---|
| Ezh2      | 1,15E-74 | 0,688958   | 1,43E-70 | 6 |
| Cenps     | 9,12E-74 | 0,37147507 | 1,13E-69 | 6 |
| Trip13    | 7,54E-72 | 0,33565227 | 9,38E-68 | 6 |
| Ccdc34    | 1,18E-71 | 0,94072895 | 1,47E-67 | 6 |
| Tmpo      | 1,61E-67 | 1,08163051 | 2,00E-63 | 6 |
| Hmgb2     | 3,90E-64 | 1,99161822 | 4,85E-60 | 6 |
| Sifn9     | 6,91E-64 | 0,48013947 | 8,60E-60 | 6 |
| H2afx     | 2,29E-59 | 0,87698915 | 2,85E-55 | 6 |
| Smc4      | 4,19E-59 | 1,18436812 | 5,21E-55 | 6 |
| Dnajc9    | 5,18E-58 | 0,70141679 | 6,45E-54 | 6 |
| Lig1      | 1,32E-57 | 0,69168043 | 1,65E-53 | 6 |
| Hist2h2ac | 7,08E-57 | 0,42237646 | 8,82E-53 | 6 |
| Cbx5      | 3,24E-56 | 0,60721574 | 4,04E-52 | 6 |
| Nav2      | 3,67E-56 | 0,35813065 | 4,57E-52 | 6 |
| Hmgn2     | 9,69E-55 | 1,04565045 | 1,21E-50 | 6 |
| Nucks1    | 9,06E-52 | 1,18944279 | 1,13E-47 | 6 |
| Tuba1b    | 9,22E-52 | 1,58253611 | 1,15E-47 | 6 |
| Pmf1      | 2,74E-50 | 0,68336915 | 3,41E-46 | 6 |
| Rfc5      | 1,05E-49 | 0,4802493  | 1,31E-45 | 6 |
| Ptma      | 4,64E-49 | 1,14217877 | 5,77E-45 | 6 |
| Syce2     | 7,03E-49 | 0,54902885 | 8,75E-45 | 6 |
| Ncapd3    | 1,20E-48 | 0,40749312 | 1,49E-44 | 6 |
| Tipin     | 1,66E-48 | 0,7420924  | 2,07E-44 | 6 |
| Plk4      | 3,10E-47 | 0,37434801 | 3,86E-43 | 6 |
| Hirip3    | 4,90E-47 | 0,30898964 | 6,10E-43 | 6 |
| Fen1      | 9,15E-47 | 0,50384425 | 1,14E-42 | 6 |
| Selenoh   | 1,04E-46 | 0,99198942 | 1,30E-42 | 6 |
| Tex30     | 2,75E-46 | 0,49716042 | 3,43E-42 | 6 |
| Hist1h1d  | 8,10E-46 | 0,42715236 | 1,01E-41 | 6 |
| Tubb5     | 9,37E-46 | 1,52570488 | 1,17E-41 | 6 |
| Prim1     | 3,65E-45 | 0,27184862 | 4,54E-41 | 6 |
| Myef2     | 3,09E-44 | 0,40004    | 3,84E-40 | 6 |
| Tubb4b    | 1,39E-43 | 1,15396968 | 1,73E-39 | 6 |
| Rpa2      | 3,50E-43 | 0,48054285 | 4,36E-39 | 6 |
| Ube2s     | 1,02E-42 | 1,35024979 | 1,26E-38 | 6 |
| H2afz     | 1,14E-42 | 1,11033831 | 1,42E-38 | 6 |
| Cenpa     | 1,03E-41 | 0,90672242 | 1,28E-37 | 6 |
| Haus1     | 2,06E-41 | 0,28570906 | 2,56E-37 | 6 |
| Usp1      | 3,77E-41 | 0,48734473 | 4,69E-37 | 6 |
| Ran       | 1,16E-40 | 1,15136889 | 1,45E-36 | 6 |
| Rangap1   | 1,18E-40 | 0,67833062 | 1,47E-36 | 6 |
| Ncapg2    | 1,44E-40 | 0,43678753 | 1,79E-36 | 6 |
| Sae1      | 3,01E-40 | 0,68489432 | 3,75E-36 | 6 |
| Cmc2      | 3,09E-40 | 0,66514324 | 3,85E-36 | 6 |
| Hist1h1e  | 8,74E-40 | 0,76410754 | 1,09E-35 | 6 |
| Rad21     | 1,11E-39 | 0,74191589 | 1,38E-35 | 6 |
| Mcm3      | 1,48E-39 | 0,53098168 | 1,85E-35 | 6 |
| Dtymk     | 3,19E-38 | 0,88820176 | 3,97E-34 | 6 |
| Dbf4      | 1,22E-37 | 0,41300316 | 1,51E-33 | 6 |
| Gja1      | 1,33E-37 | 0,42024827 | 1,65E-33 | 6 |
| Dctpp1    | 6,26E-37 | 0,84131633 | 7,78E-33 | 6 |
| Rfc4      | 6,87E-37 | 0,44774396 | 8,55E-33 | 6 |
| Gins2     | 8,12E-37 | 0,3428149  | 1,01E-32 | 6 |
| Anp32b    | 9,54E-37 | 0,95253146 | 1,19E-32 | 6 |
| Cbx3      | 1,87E-36 | 0,85107028 | 2,33E-32 | 6 |
| Rcc1      | 3,82E-36 | 0,31735455 | 4,76E-32 | 6 |
| Nup85     | 1,14E-35 | 0,40831946 | 1,42E-31 | 6 |
| Psip1     | 5,24E-35 | 0,30649886 | 6,52E-31 | 6 |
| Hnrnpab   | 1,37E-34 | 0,98843654 | 1,70E-30 | 6 |
| Dek       | 3,93E-34 | 0,9893806  | 4,90E-30 | 6 |
| Nup35     | 4,05E-34 | 0,25875994 | 5,04E-30 | 6 |
| Hmgb1     | 4,11E-34 | 1,00727741 | 5,11E-30 | 6 |
| Psat1     | 4,55E-33 | 0,31626894 | 5,66E-29 | 6 |
| Hat1      | 4,86E-33 | 0,5655385  | 6,05E-29 | 6 |
| Alyref    | 1,73E-32 | 0,52913312 | 2,15E-28 | 6 |
| Anp32e    | 2,60E-32 | 0,97799532 | 3,24E-28 | 6 |
| Suz12     | 2,18E-31 | 0,37937643 | 2,72E-27 | 6 |
| Spn       | 5,71E-31 | 0,6415129  | 7,11E-27 | 6 |
| Ybx3      | 6,87E-31 | 0,6342056  | 8,54E-27 | 6 |
| Kpna2     | 1,84E-30 | 0,48510485 | 2,29E-26 | 6 |
| Nsd2      | 2,81E-30 | 0,541192   | 3,50E-26 | 6 |

|           |          |            |          |   |
|-----------|----------|------------|----------|---|
| Fxn       | 6,43E-30 | 0,26839128 | 8,01E-26 | 6 |
| Orc6      | 7,25E-30 | 0,4648169  | 9,02E-26 | 6 |
| Lsm2      | 1,07E-29 | 0,60877748 | 1,33E-25 | 6 |
| Rfc3      | 1,45E-29 | 0,3095975  | 1,80E-25 | 6 |
| Topbp1    | 2,17E-29 | 0,4439722  | 2,71E-25 | 6 |
| Arhgap11a | 3,14E-29 | 0,3945564  | 3,91E-25 | 6 |
| Smyd2     | 3,29E-29 | 0,32561118 | 4,10E-25 | 6 |
| Lbr       | 3,32E-29 | 0,55597558 | 4,13E-25 | 6 |
| Nasp      | 3,54E-29 | 0,54142808 | 4,40E-25 | 6 |
| Dnmt1     | 5,16E-29 | 0,52208895 | 6,43E-25 | 6 |
| Nap1l1    | 1,26E-28 | 0,88833937 | 1,57E-24 | 6 |
| Set       | 1,54E-28 | 0,9319221  | 1,92E-24 | 6 |
| Tubg1     | 1,68E-28 | 0,30216485 | 2,09E-24 | 6 |
| Ncaph2    | 2,00E-28 | 0,46688894 | 2,49E-24 | 6 |
| Trim28    | 2,67E-28 | 0,39268762 | 3,33E-24 | 6 |
| H2afv     | 3,67E-28 | 1,12142572 | 4,57E-24 | 6 |
| Pcna      | 7,14E-28 | 0,84512004 | 8,89E-24 | 6 |
| Vars      | 7,43E-28 | 0,39428749 | 9,25E-24 | 6 |
| Ckap5     | 1,07E-27 | 0,40517012 | 1,33E-23 | 6 |
| Hsp90aa1  | 1,10E-27 | 0,95341613 | 1,37E-23 | 6 |
| Nop56     | 1,45E-27 | 0,6273288  | 1,81E-23 | 6 |
| Gemin6    | 1,50E-27 | 0,29464663 | 1,87E-23 | 6 |
| Kmt5a     | 2,55E-27 | 0,35244508 | 3,18E-23 | 6 |
| Sms       | 4,88E-27 | 0,55277536 | 6,07E-23 | 6 |
| Cdca4     | 5,11E-27 | 0,27655775 | 6,37E-23 | 6 |
| Snrpd1    | 5,42E-27 | 0,81330092 | 6,75E-23 | 6 |
| Nudcd2    | 6,49E-27 | 0,53606112 | 8,07E-23 | 6 |
| Shmt2     | 6,93E-27 | 0,42677175 | 8,63E-23 | 6 |
| Nrm       | 8,94E-27 | 0,60072415 | 1,11E-22 | 6 |
| Hmgn1     | 1,19E-26 | 0,73015866 | 1,49E-22 | 6 |
| Dck       | 2,31E-26 | 0,41972783 | 2,87E-22 | 6 |
| Tuba1c    | 4,24E-26 | 0,84642973 | 5,27E-22 | 6 |
| Hist1h4d  | 7,50E-26 | 0,33402942 | 9,33E-22 | 6 |
| Ppia      | 1,09E-25 | 0,58729261 | 1,36E-21 | 6 |
| Lsm5      | 1,55E-25 | 0,74561663 | 1,93E-21 | 6 |
| Tmem107   | 2,17E-25 | 0,25291086 | 2,70E-21 | 6 |
| Hjurp     | 5,52E-25 | 0,33998395 | 6,86E-21 | 6 |
| Hint1     | 9,51E-25 | 0,66808656 | 1,18E-20 | 6 |
| Kpnb1     | 2,30E-24 | 0,41303487 | 2,86E-20 | 6 |
| Pold2     | 6,53E-24 | 0,4255117  | 8,13E-20 | 6 |
| Smc3      | 6,93E-24 | 0,55255545 | 8,62E-20 | 6 |
| Dkc1      | 7,57E-24 | 0,46888896 | 9,42E-20 | 6 |
| Chchd10   | 1,05E-23 | 0,38509609 | 1,31E-19 | 6 |
| Ranbp1    | 1,74E-23 | 0,99776572 | 2,17E-19 | 6 |
| Rpa3      | 2,13E-23 | 0,4132391  | 2,65E-19 | 6 |
| Rbbp7     | 3,98E-23 | 0,60426964 | 4,95E-19 | 6 |
| Ncl       | 7,76E-23 | 0,93140725 | 9,66E-19 | 6 |
| Rfwd3     | 1,29E-22 | 0,26094762 | 1,61E-18 | 6 |
| Snrnp25   | 1,35E-22 | 0,37717586 | 1,68E-18 | 6 |
| Srsf3     | 2,60E-22 | 0,72413072 | 3,24E-18 | 6 |
| Rcc2      | 5,30E-22 | 0,46417217 | 6,59E-18 | 6 |
| Atpif1    | 1,56E-21 | 0,70285404 | 1,95E-17 | 6 |
| Hnrnpd    | 1,68E-21 | 0,42166893 | 2,10E-17 | 6 |
| Nup93     | 1,97E-21 | 0,27986041 | 2,46E-17 | 6 |
| Actn4     | 2,93E-21 | 0,46520718 | 3,64E-17 | 6 |
| Srsf7     | 4,61E-21 | 0,68720772 | 5,74E-17 | 6 |
| Snrpe     | 4,90E-21 | 0,67848377 | 6,09E-17 | 6 |
| Rpl41     | 7,44E-21 | 0,54534757 | 9,26E-17 | 6 |
| Pds5a     | 1,72E-20 | 0,34501693 | 2,14E-16 | 6 |
| Slc4a7    | 2,02E-20 | 0,3832149  | 2,51E-16 | 6 |
| Slc25a10  | 2,18E-20 | 0,26067053 | 2,72E-16 | 6 |
| Ppih      | 2,40E-20 | 0,3550827  | 2,99E-16 | 6 |
| Hdgf      | 2,42E-20 | 0,66295266 | 3,01E-16 | 6 |
| Hacd1     | 3,04E-20 | 0,26082597 | 3,78E-16 | 6 |
| Lsm8      | 3,62E-20 | 0,46766123 | 4,50E-16 | 6 |
| Dpy30     | 3,67E-20 | 0,61883181 | 4,57E-16 | 6 |
| Pa2g4     | 3,99E-20 | 0,73412988 | 4,97E-16 | 6 |
| Hpf1      | 4,37E-20 | 0,49803092 | 5,44E-16 | 6 |
| Bicd2     | 5,30E-20 | 0,34629938 | 6,59E-16 | 6 |
| Ilf3      | 8,58E-20 | 0,26125558 | 1,07E-15 | 6 |
| Rpa1      | 1,04E-19 | 0,28594212 | 1,29E-15 | 6 |

|           |          |            |          |   |
|-----------|----------|------------|----------|---|
| Mcm4      | 1,25E-19 | 0,35023676 | 1,55E-15 | 6 |
| Uchl5     | 1,28E-19 | 0,46494094 | 1,60E-15 | 6 |
| Mis12     | 1,56E-19 | 0,28255647 | 1,95E-15 | 6 |
| Snhg6     | 1,96E-19 | 0,42842576 | 2,44E-15 | 6 |
| Aimp2     | 1,97E-19 | 0,29229042 | 2,45E-15 | 6 |
| Mrpl49    | 2,00E-19 | 0,33136556 | 2,50E-15 | 6 |
| Banf1     | 2,18E-19 | 0,59980955 | 2,71E-15 | 6 |
| Haus4     | 3,14E-19 | 0,31511548 | 3,90E-15 | 6 |
| Nop58     | 3,18E-19 | 0,45486469 | 3,96E-15 | 6 |
| Prdx4     | 4,30E-19 | 0,63395626 | 5,36E-15 | 6 |
| Ppa1      | 5,50E-19 | 0,4066068  | 6,85E-15 | 6 |
| Birc2     | 8,65E-19 | 0,2730989  | 1,08E-14 | 6 |
| Tmem97    | 1,07E-18 | 0,2999682  | 1,34E-14 | 6 |
| Cisd1     | 1,09E-18 | 0,45768719 | 1,36E-14 | 6 |
| Exosc8    | 1,16E-18 | 0,44813914 | 1,45E-14 | 6 |
| Dynlt1f   | 1,33E-18 | 0,41238749 | 1,66E-14 | 6 |
| Txn1      | 1,51E-18 | 0,70361593 | 1,88E-14 | 6 |
| Jpt1      | 1,84E-18 | 0,74950689 | 2,29E-14 | 6 |
| Smarca5   | 2,04E-18 | 0,50112167 | 2,54E-14 | 6 |
| Ssrp1     | 2,07E-18 | 0,52017824 | 2,58E-14 | 6 |
| Prkar2a   | 2,42E-18 | 0,37288698 | 3,01E-14 | 6 |
| Nmral1    | 3,28E-18 | 0,31992289 | 4,08E-14 | 6 |
| Ndufaf2   | 3,35E-18 | 0,39513871 | 4,16E-14 | 6 |
| Ddx39     | 3,43E-18 | 0,50616481 | 4,27E-14 | 6 |
| Mrpl18    | 4,66E-18 | 0,6150421  | 5,79E-14 | 6 |
| Hspd1     | 4,90E-18 | 0,82545796 | 6,10E-14 | 6 |
| Cnot6     | 5,41E-18 | 0,39676245 | 6,74E-14 | 6 |
| Ptpn7     | 5,76E-18 | 0,36595408 | 7,17E-14 | 6 |
| Tsc22d1   | 6,73E-18 | 0,64949695 | 8,38E-14 | 6 |
| Mis18a    | 6,97E-18 | 0,42033409 | 8,67E-14 | 6 |
| Eri1      | 7,91E-18 | 0,38913628 | 9,85E-14 | 6 |
| Snrpf     | 1,24E-17 | 0,53447274 | 1,54E-13 | 6 |
| Lpl       | 1,24E-17 | 0,61727922 | 1,55E-13 | 6 |
| Srm       | 1,34E-17 | 0,39906173 | 1,66E-13 | 6 |
| Rplp1     | 1,51E-17 | 0,46487525 | 1,88E-13 | 6 |
| Mrpl51    | 1,68E-17 | 0,6149513  | 2,09E-13 | 6 |
| Khsrp     | 1,81E-17 | 0,25933768 | 2,25E-13 | 6 |
| Pabpc4    | 2,06E-17 | 0,28850223 | 2,57E-13 | 6 |
| Mybbp1a   | 2,18E-17 | 0,39234347 | 2,71E-13 | 6 |
| Hnrnpa2b1 | 2,36E-17 | 0,53081599 | 2,93E-13 | 6 |
| Nxt1      | 2,41E-17 | 0,38381786 | 3,00E-13 | 6 |
| Bola3     | 3,79E-17 | 0,41500412 | 4,72E-13 | 6 |
| Lsm4      | 4,38E-17 | 0,59890628 | 5,45E-13 | 6 |
| Hnrnpa1   | 5,48E-17 | 0,64762539 | 6,82E-13 | 6 |
| Pdap1     | 6,37E-17 | 0,58552227 | 7,93E-13 | 6 |
| Csrp1     | 7,58E-17 | 0,36423946 | 9,43E-13 | 6 |
| Rnaseh2b  | 7,74E-17 | 0,3541326  | 9,63E-13 | 6 |
| Impdh2    | 8,23E-17 | 0,5655497  | 1,02E-12 | 6 |
| Nudc      | 8,94E-17 | 0,5702837  | 1,11E-12 | 6 |
| Lrpprc    | 1,17E-16 | 0,30223041 | 1,45E-12 | 6 |
| Bex3      | 1,37E-16 | 0,31232927 | 1,70E-12 | 6 |
| G3bp1     | 1,42E-16 | 0,54200112 | 1,77E-12 | 6 |
| Ptges3    | 1,56E-16 | 0,54613471 | 1,95E-12 | 6 |
| Mycbp     | 1,63E-16 | 0,35867568 | 2,03E-12 | 6 |
| Slbp      | 1,64E-16 | 0,55668112 | 2,04E-12 | 6 |
| Nolc1     | 1,76E-16 | 0,42747531 | 2,19E-12 | 6 |
| Dynlt1a   | 2,28E-16 | 0,27117905 | 2,83E-12 | 6 |
| Siva1     | 2,37E-16 | 0,54477567 | 2,94E-12 | 6 |
| Ncbp1     | 3,13E-16 | 0,29291988 | 3,89E-12 | 6 |
| Psmg2     | 3,44E-16 | 0,33430098 | 4,28E-12 | 6 |
| Lsm3      | 3,69E-16 | 0,45922623 | 4,60E-12 | 6 |
| Dhx15     | 3,89E-16 | 0,45926758 | 4,84E-12 | 6 |
| Eif1ad    | 4,88E-16 | 0,39528196 | 6,07E-12 | 6 |
| Rplp2     | 5,23E-16 | 0,37870458 | 6,51E-12 | 6 |
| Rps12     | 6,73E-16 | 0,55791158 | 8,37E-12 | 6 |
| Hmgn5     | 7,51E-16 | 0,28361911 | 9,35E-12 | 6 |
| Dynll2    | 8,50E-16 | 0,39948388 | 1,06E-11 | 6 |
| Nfatc1    | 8,62E-16 | 0,45472234 | 1,07E-11 | 6 |
| Larp7     | 9,41E-16 | 0,3430838  | 1,17E-11 | 6 |
| Timm50    | 1,03E-15 | 0,43866155 | 1,29E-11 | 6 |
| Syncrip   | 1,29E-15 | 0,40762333 | 1,61E-11 | 6 |

|          |          |            |          |   |
|----------|----------|------------|----------|---|
| Ptbp1    | 1,39E-15 | 0,26561929 | 1,72E-11 | 6 |
| Rhno1    | 1,48E-15 | 0,25794572 | 1,84E-11 | 6 |
| Npm3     | 1,58E-15 | 0,47158061 | 1,96E-11 | 6 |
| Serbp1   | 1,67E-15 | 0,60692115 | 2,07E-11 | 6 |
| Fkbp3    | 2,50E-15 | 0,53434895 | 3,11E-11 | 6 |
| Snrpg    | 2,87E-15 | 0,62026456 | 3,57E-11 | 6 |
| Xpo1     | 2,96E-15 | 0,25435684 | 3,68E-11 | 6 |
| Lyar     | 3,11E-15 | 0,38452338 | 3,88E-11 | 6 |
| Gnl3     | 3,34E-15 | 0,57545884 | 4,15E-11 | 6 |
| Caprin1  | 3,88E-15 | 0,41183205 | 4,83E-11 | 6 |
| Dhx9     | 3,98E-15 | 0,30780558 | 4,95E-11 | 6 |
| Pole4    | 4,30E-15 | 0,3996142  | 5,35E-11 | 6 |
| Snrpa1   | 4,56E-15 | 0,36922128 | 5,68E-11 | 6 |
| Cited2   | 4,91E-15 | 0,43729149 | 6,11E-11 | 6 |
| Sod1     | 5,33E-15 | 0,57171557 | 6,64E-11 | 6 |
| Apex1    | 5,44E-15 | 0,41846902 | 6,77E-11 | 6 |
| Cycs     | 5,48E-15 | 0,75832347 | 6,82E-11 | 6 |
| Cdk4     | 6,11E-15 | 0,48557307 | 7,60E-11 | 6 |
| Smc1a    | 6,75E-15 | 0,4100488  | 8,41E-11 | 6 |
| Slc1a5   | 7,11E-15 | 0,32628222 | 8,85E-11 | 6 |
| Hdac2    | 7,24E-15 | 0,29653179 | 9,02E-11 | 6 |
| Hspa14   | 8,73E-15 | 0,30388311 | 1,09E-10 | 6 |
| Nop16    | 1,02E-14 | 0,34804749 | 1,27E-10 | 6 |
| Odf2     | 1,11E-14 | 0,26817002 | 1,39E-10 | 6 |
| Gm8186   | 1,31E-14 | 0,49341627 | 1,63E-10 | 6 |
| Ppid     | 1,35E-14 | 0,3066617  | 1,68E-10 | 6 |
| Tsfm     | 1,60E-14 | 0,29444424 | 2,00E-10 | 6 |
| Atp5g3   | 1,70E-14 | 0,623099   | 2,11E-10 | 6 |
| Cep83    | 1,93E-14 | 0,25584451 | 2,40E-10 | 6 |
| Lmf2     | 2,17E-14 | 0,25409596 | 2,70E-10 | 6 |
| Rpsa     | 2,50E-14 | 0,5035769  | 3,11E-10 | 6 |
| Uba2     | 3,11E-14 | 0,37114371 | 3,87E-10 | 6 |
| Hp1bp3   | 3,45E-14 | 0,48145173 | 4,29E-10 | 6 |
| Cox7a2   | 3,55E-14 | 0,51961535 | 4,41E-10 | 6 |
| Smc6     | 3,65E-14 | 0,46477353 | 4,54E-10 | 6 |
| Srsf1    | 3,73E-14 | 0,32702317 | 4,64E-10 | 6 |
| Fam111a  | 4,17E-14 | 0,554525   | 5,19E-10 | 6 |
| Tfdp1    | 4,25E-14 | 0,25367634 | 5,29E-10 | 6 |
| Tomm70a  | 5,57E-14 | 0,33828107 | 6,94E-10 | 6 |
| Ilf2     | 5,58E-14 | 0,35765791 | 6,94E-10 | 6 |
| Mphosph6 | 6,49E-14 | 0,27606015 | 8,08E-10 | 6 |
| Nrp2     | 6,78E-14 | 0,72706681 | 8,44E-10 | 6 |
| Cox5a    | 6,88E-14 | 0,54993141 | 8,56E-10 | 6 |
| Sfpq     | 7,15E-14 | 0,48413197 | 8,89E-10 | 6 |
| Bdh2     | 7,50E-14 | 0,40747126 | 9,33E-10 | 6 |
| Mif      | 7,53E-14 | 0,839179   | 9,37E-10 | 6 |
| Smchd1   | 7,76E-14 | 0,39535759 | 9,65E-10 | 6 |
| Ak2      | 9,74E-14 | 0,55508464 | 1,21E-09 | 6 |
| Rdm1     | 1,19E-13 | 0,36085767 | 1,48E-09 | 6 |
| Rnf19b   | 1,27E-13 | 0,30308118 | 1,58E-09 | 6 |
| Rfc1     | 1,30E-13 | 0,32055248 | 1,61E-09 | 6 |
| Nhp2     | 1,37E-13 | 0,6718717  | 1,70E-09 | 6 |
| Numa1    | 1,56E-13 | 0,30635721 | 1,95E-09 | 6 |
| Cdkn2c   | 1,59E-13 | 0,53311891 | 1,97E-09 | 6 |
| Rpl22    | 1,71E-13 | 0,42031989 | 2,13E-09 | 6 |
| Tubb6    | 1,71E-13 | 0,61611764 | 2,13E-09 | 6 |
| Npm1     | 2,21E-13 | 0,81206374 | 2,75E-09 | 6 |
| Rps27l   | 2,23E-13 | 0,55161743 | 2,78E-09 | 6 |
| Prmt1    | 2,44E-13 | 0,47921113 | 3,04E-09 | 6 |
| Tssc4    | 2,88E-13 | 0,26456145 | 3,58E-09 | 6 |
| Spcs3    | 3,06E-13 | 0,26724043 | 3,80E-09 | 6 |
| Acot7    | 3,11E-13 | 0,28070231 | 3,87E-09 | 6 |
| Eef1e1   | 3,35E-13 | 0,4191767  | 4,17E-09 | 6 |
| Odc1     | 3,45E-13 | 0,29733451 | 4,30E-09 | 6 |
| Rps8     | 3,65E-13 | 0,54567784 | 4,55E-09 | 6 |
| Gar1     | 4,93E-13 | 0,32399216 | 6,14E-09 | 6 |
| Nubp1    | 5,00E-13 | 0,41963725 | 6,23E-09 | 6 |
| Ssna1    | 5,13E-13 | 0,4140701  | 6,39E-09 | 6 |
| Polr2l   | 5,30E-13 | 0,43543526 | 6,60E-09 | 6 |
| Hsp90ab1 | 5,42E-13 | 0,56435894 | 6,75E-09 | 6 |
| Rpl36a   | 5,59E-13 | 0,49186819 | 6,96E-09 | 6 |

|               |          |            |          |   |
|---------------|----------|------------|----------|---|
| Glipr1        | 5,91E-13 | 0,3357516  | 7,36E-09 | 6 |
| Anapc5        | 6,18E-13 | 0,4507082  | 7,69E-09 | 6 |
| Prrc2a        | 6,54E-13 | 0,33952174 | 8,13E-09 | 6 |
| H2afy         | 6,55E-13 | 0,44013517 | 8,15E-09 | 6 |
| Magoh         | 8,66E-13 | 0,43290269 | 1,08E-08 | 6 |
| Uqcr11        | 8,79E-13 | 0,47227452 | 1,09E-08 | 6 |
| Paics         | 9,43E-13 | 0,36499975 | 1,17E-08 | 6 |
| Mrps28        | 1,03E-12 | 0,39323696 | 1,28E-08 | 6 |
| Atp5k         | 1,14E-12 | 0,52937443 | 1,42E-08 | 6 |
| Hspe1         | 1,23E-12 | 0,82998048 | 1,53E-08 | 6 |
| 2010107E04Rik | 1,40E-12 | 0,45337219 | 1,74E-08 | 6 |
| Hnrnpa0       | 1,43E-12 | 0,34616134 | 1,78E-08 | 6 |
| Fbl           | 1,46E-12 | 0,54667764 | 1,82E-08 | 6 |
| Srsf2         | 1,52E-12 | 0,49025775 | 1,89E-08 | 6 |
| Cdkn2d        | 1,61E-12 | 0,34883112 | 2,00E-08 | 6 |
| Ndufc1        | 1,69E-12 | 0,52765512 | 2,11E-08 | 6 |
| Purb          | 1,73E-12 | 0,36260748 | 2,16E-08 | 6 |
| Wdr43         | 1,77E-12 | 0,29123027 | 2,20E-08 | 6 |
| Rps17         | 1,79E-12 | 0,43212193 | 2,23E-08 | 6 |
| Gas2l3        | 1,90E-12 | 0,25102871 | 2,37E-08 | 6 |
| Mrpl42        | 2,02E-12 | 0,44550985 | 2,52E-08 | 6 |
| Snrpd2        | 2,12E-12 | 0,50922574 | 2,64E-08 | 6 |
| Rpl12         | 2,35E-12 | 0,55992277 | 2,92E-08 | 6 |
| Pgk1          | 2,48E-12 | 0,50320152 | 3,09E-08 | 6 |
| Sfxn1         | 2,94E-12 | 0,27161349 | 3,66E-08 | 6 |
| Lsm6          | 3,09E-12 | 0,47367065 | 3,85E-08 | 6 |
| Stip1         | 3,18E-12 | 0,35245012 | 3,96E-08 | 6 |
| Ckap4         | 3,79E-12 | 0,27673343 | 4,72E-08 | 6 |
| Klhl5         | 3,94E-12 | 0,25521106 | 4,90E-08 | 6 |
| Sf3b3         | 4,11E-12 | 0,34712264 | 5,11E-08 | 6 |
| Pfdn4         | 4,16E-12 | 0,51661337 | 5,18E-08 | 6 |
| Eif4g2        | 4,56E-12 | 0,52118841 | 5,67E-08 | 6 |
| Cav2          | 4,76E-12 | 0,28773062 | 5,92E-08 | 6 |
| Pih1d1        | 4,84E-12 | 0,26699362 | 6,02E-08 | 6 |
| Rad23b        | 4,97E-12 | 0,35878165 | 6,18E-08 | 6 |
| Rnaseh2a      | 5,03E-12 | 0,27111023 | 6,26E-08 | 6 |
| Mrpl15        | 5,04E-12 | 0,38033906 | 6,27E-08 | 6 |
| Agpat5        | 5,13E-12 | 0,27937367 | 6,39E-08 | 6 |
| Ing1          | 5,73E-12 | 0,28063453 | 7,13E-08 | 6 |
| Wapl          | 5,96E-12 | 0,26968658 | 7,42E-08 | 6 |
| Rpl38         | 6,08E-12 | 0,48880042 | 7,57E-08 | 6 |
| Rbm3          | 7,37E-12 | 0,38648829 | 9,18E-08 | 6 |
| Nop10         | 8,35E-12 | 0,56072534 | 1,04E-07 | 6 |
| Atp5g2        | 8,44E-12 | 0,47930699 | 1,05E-07 | 6 |
| Ndufaf4       | 8,56E-12 | 0,29469679 | 1,07E-07 | 6 |
| Rpl28         | 9,15E-12 | 0,34518409 | 1,14E-07 | 6 |
| Nme1          | 9,45E-12 | 0,44818165 | 1,18E-07 | 6 |
| Rps20         | 9,54E-12 | 0,42730459 | 1,19E-07 | 6 |
| Tcf3          | 9,61E-12 | 0,29636472 | 1,20E-07 | 6 |
| Ybx1          | 9,82E-12 | 0,47899772 | 1,22E-07 | 6 |
| Txnrd1        | 1,04E-11 | 0,33261557 | 1,30E-07 | 6 |
| Actl6a        | 1,27E-11 | 0,27354667 | 1,58E-07 | 6 |
| Rps26         | 1,29E-11 | 0,42182956 | 1,60E-07 | 6 |
| Ctcf          | 1,30E-11 | 0,27928414 | 1,62E-07 | 6 |
| Ndufa12       | 1,46E-11 | 0,473208   | 1,82E-07 | 6 |
| lpo5          | 1,55E-11 | 0,26715284 | 1,93E-07 | 6 |
| Ccdc25        | 1,56E-11 | 0,25935903 | 1,95E-07 | 6 |
| Mrps25        | 1,67E-11 | 0,30742671 | 2,08E-07 | 6 |
| Gm10053       | 1,87E-11 | 0,29501093 | 2,32E-07 | 6 |
| Pnn           | 1,88E-11 | 0,35322341 | 2,34E-07 | 6 |
| Cav1          | 1,89E-11 | 0,29850581 | 2,35E-07 | 6 |
| Dnajc2        | 1,96E-11 | 0,3337059  | 2,44E-07 | 6 |
| Ddt           | 2,05E-11 | 0,4275677  | 2,55E-07 | 6 |
| Tfric         | 2,08E-11 | 0,34391    | 2,59E-07 | 6 |
| Rps15         | 2,15E-11 | 0,372821   | 2,68E-07 | 6 |
| Pole3         | 2,16E-11 | 0,29174407 | 2,68E-07 | 6 |
| Gatm          | 2,37E-11 | 0,51522295 | 2,95E-07 | 6 |
| Immt          | 2,40E-11 | 0,33955952 | 2,98E-07 | 6 |
| Erh           | 2,42E-11 | 0,51460226 | 3,01E-07 | 6 |
| Ccnd1         | 2,46E-11 | 0,51302354 | 3,06E-07 | 6 |
| Ak6           | 2,80E-11 | 0,26988312 | 3,49E-07 | 6 |

|               |          |            |          |   |
|---------------|----------|------------|----------|---|
| Adss          | 3,07E-11 | 0,35395466 | 3,82E-07 | 6 |
| Rpl5          | 3,08E-11 | 0,45821046 | 3,83E-07 | 6 |
| Sf3a3         | 3,35E-11 | 0,26582478 | 4,17E-07 | 6 |
| Huwe1         | 3,43E-11 | 0,29980749 | 4,26E-07 | 6 |
| Arl6ip1       | 3,43E-11 | 0,91837224 | 4,27E-07 | 6 |
| Gadd45gip1    | 3,51E-11 | 0,39867145 | 4,36E-07 | 6 |
| Fabp5         | 3,57E-11 | 0,29315502 | 4,44E-07 | 6 |
| Pgp           | 3,69E-11 | 0,37206137 | 4,59E-07 | 6 |
| Ola1          | 4,18E-11 | 0,25428945 | 5,21E-07 | 6 |
| Cct2          | 4,36E-11 | 0,40647852 | 5,43E-07 | 6 |
| Ppp2r5c       | 4,57E-11 | 0,30216033 | 5,69E-07 | 6 |
| Lars          | 5,62E-11 | 0,25760929 | 6,99E-07 | 6 |
| Kpna3         | 5,87E-11 | 0,27176303 | 7,30E-07 | 6 |
| Pabpc1        | 7,31E-11 | 0,42535271 | 9,10E-07 | 6 |
| AC160336.1    | 7,65E-11 | 0,41749204 | 9,52E-07 | 6 |
| Nudt5         | 8,09E-11 | 0,28697186 | 1,01E-06 | 6 |
| Mapk1         | 1,02E-10 | 0,34706691 | 1,27E-06 | 6 |
| Elavl1        | 1,06E-10 | 0,27200954 | 1,32E-06 | 6 |
| Eif2s2        | 1,10E-10 | 0,53329807 | 1,37E-06 | 6 |
| C1qbp         | 1,10E-10 | 0,54205549 | 1,37E-06 | 6 |
| Ktn1          | 1,12E-10 | 0,36423368 | 1,39E-06 | 6 |
| Coq7          | 1,16E-10 | 0,25584815 | 1,44E-06 | 6 |
| Naa10         | 1,25E-10 | 0,27692234 | 1,55E-06 | 6 |
| Minos1        | 1,28E-10 | 0,44585462 | 1,59E-06 | 6 |
| Pbrm1         | 1,30E-10 | 0,39171721 | 1,62E-06 | 6 |
| Vrk1          | 1,40E-10 | 0,30170251 | 1,74E-06 | 6 |
| Ddx18         | 1,46E-10 | 0,36083237 | 1,82E-06 | 6 |
| Srsf10        | 1,57E-10 | 0,28515787 | 1,95E-06 | 6 |
| Map4k4        | 1,59E-10 | 0,30962312 | 1,98E-06 | 6 |
| Snrpb         | 1,69E-10 | 0,39633662 | 2,10E-06 | 6 |
| Ctsk          | 1,77E-10 | 0,9497932  | 2,20E-06 | 6 |
| Rnps1         | 1,85E-10 | 0,35229844 | 2,30E-06 | 6 |
| Ubald2        | 1,86E-10 | 0,42967726 | 2,31E-06 | 6 |
| Timm13        | 2,04E-10 | 0,45843979 | 2,53E-06 | 6 |
| Ap1s1         | 2,05E-10 | 0,31398353 | 2,55E-06 | 6 |
| Itpa          | 2,14E-10 | 0,26493357 | 2,66E-06 | 6 |
| Snrpd3        | 2,21E-10 | 0,43503154 | 2,75E-06 | 6 |
| Timm8a1       | 2,34E-10 | 0,28310328 | 2,91E-06 | 6 |
| Cct7          | 2,36E-10 | 0,46000563 | 2,94E-06 | 6 |
| Rfc2          | 2,45E-10 | 0,26556362 | 3,04E-06 | 6 |
| Tial1         | 2,49E-10 | 0,34781167 | 3,10E-06 | 6 |
| Cbfb          | 2,70E-10 | 0,26681692 | 3,36E-06 | 6 |
| Luc7l3        | 3,15E-10 | 0,34277219 | 3,92E-06 | 6 |
| Bckdk         | 3,50E-10 | 0,26928521 | 4,36E-06 | 6 |
| Pcbp2         | 3,51E-10 | 0,37830952 | 4,37E-06 | 6 |
| 1810037l17Rik | 3,82E-10 | 0,59851032 | 4,75E-06 | 6 |
| Rpl37a        | 4,11E-10 | 0,41724883 | 5,11E-06 | 6 |
| Ivns1abp      | 4,31E-10 | 0,32684873 | 5,37E-06 | 6 |
| Rpl35         | 4,37E-10 | 0,39168162 | 5,43E-06 | 6 |
| Nmt2          | 4,38E-10 | 0,25325028 | 5,45E-06 | 6 |
| S100a4        | 4,55E-10 | 0,30592622 | 5,67E-06 | 6 |
| Bola2         | 5,63E-10 | 0,553453   | 7,00E-06 | 6 |
| Ndufab1       | 5,76E-10 | 0,56600497 | 7,17E-06 | 6 |
| Mrpl28        | 5,80E-10 | 0,3442635  | 7,22E-06 | 6 |
| Rpl36         | 5,91E-10 | 0,37165177 | 7,36E-06 | 6 |
| Rnaseh2c      | 6,06E-10 | 0,31307651 | 7,54E-06 | 6 |
| Ccdc88a       | 6,43E-10 | 0,31199584 | 8,00E-06 | 6 |
| Rps21         | 7,10E-10 | 0,42875403 | 8,83E-06 | 6 |
| Rbbp4         | 7,45E-10 | 0,31882484 | 9,27E-06 | 6 |
| Cpsf2         | 7,91E-10 | 0,27247751 | 9,85E-06 | 6 |
| Cd44          | 8,19E-10 | 0,41356645 | 1,02E-05 | 6 |
| Fam133b       | 8,26E-10 | 0,26120271 | 1,03E-05 | 6 |
| Uqcr10        | 8,81E-10 | 0,44756587 | 1,10E-05 | 6 |
| Rack1         | 8,84E-10 | 0,39413611 | 1,10E-05 | 6 |
| Nsun2         | 9,27E-10 | 0,33945041 | 1,15E-05 | 6 |
| Nono          | 9,53E-10 | 0,30228296 | 1,19E-05 | 6 |
| Hnrnpu        | 1,03E-09 | 0,43488179 | 1,28E-05 | 6 |
| Tardbp        | 1,06E-09 | 0,30138887 | 1,32E-05 | 6 |
| Ssb           | 1,25E-09 | 0,41882722 | 1,56E-05 | 6 |
| Cct3          | 1,35E-09 | 0,36296789 | 1,68E-05 | 6 |
| Rpl39         | 1,35E-09 | 0,3169374  | 1,68E-05 | 6 |

|            |          |            |            |   |
|------------|----------|------------|------------|---|
| Naa50      | 1,40E-09 | 0,45191348 | 1,74E-05   | 6 |
| mt-Nd1     | 1,43E-09 | 0,48155347 | 1,78E-05   | 6 |
| Dcun1d5    | 1,50E-09 | 0,29796043 | 1,86E-05   | 6 |
| S100a10    | 1,50E-09 | 0,43332042 | 1,87E-05   | 6 |
| Tcp1       | 1,61E-09 | 0,39901301 | 2,01E-05   | 6 |
| Zc3h15     | 1,65E-09 | 0,27157467 | 2,05E-05   | 6 |
| Rbmx11     | 1,65E-09 | 0,30352779 | 2,06E-05   | 6 |
| ldh3a      | 1,88E-09 | 0,26145975 | 2,34E-05   | 6 |
| Brix1      | 1,98E-09 | 0,25762775 | 2,46E-05   | 6 |
| Calm3      | 1,98E-09 | 0,44650207 | 2,46E-05   | 6 |
| Fus        | 2,01E-09 | 0,43576637 | 2,50E-05   | 6 |
| Ddx21      | 2,01E-09 | 0,39467902 | 2,51E-05   | 6 |
| Brd7       | 2,09E-09 | 0,26616699 | 2,61E-05   | 6 |
| Slc29a1    | 2,17E-09 | 0,3217651  | 2,70E-05   | 6 |
| Rbm8a      | 2,24E-09 | 0,36981094 | 2,79E-05   | 6 |
| Sdc3       | 2,26E-09 | 0,2815443  | 2,82E-05   | 6 |
| Rps19bp1   | 2,43E-09 | 0,25198924 | 3,02E-05   | 6 |
| Crip2      | 2,50E-09 | 0,40729111 | 3,11E-05   | 6 |
| Eef1g      | 2,52E-09 | 0,52818202 | 3,14E-05   | 6 |
| Mbd3       | 2,68E-09 | 0,28060279 | 3,33E-05   | 6 |
| Mrpl34     | 2,71E-09 | 0,28545223 | 3,38E-05   | 6 |
| Eif3j1     | 2,80E-09 | 0,42205266 | 3,48E-05   | 6 |
| Gtf2h5     | 2,99E-09 | 0,39110096 | 3,72E-05   | 6 |
| Matr3      | 2,99E-09 | 0,2708181  | 3,73E-05   | 6 |
| Eif1ax     | 3,02E-09 | 0,30779438 | 3,76E-05   | 6 |
| Rpl31      | 3,17E-09 | 0,33930449 | 3,95E-05   | 6 |
| Snu13      | 3,18E-09 | 0,51709766 | 3,95E-05   | 6 |
| Rps19      | 3,29E-09 | 0,36071618 | 4,09E-05   | 6 |
| Dazap1     | 3,35E-09 | 0,30681239 | 4,16E-05   | 6 |
| Kdelr2     | 3,44E-09 | 0,27465054 | 4,28E-05   | 6 |
| Mrpl12     | 3,49E-09 | 0,47208629 | 4,34E-05   | 6 |
| Arpp19     | 3,80E-09 | 0,40559578 | 4,73E-05   | 6 |
| Ddx39b     | 3,85E-09 | 0,39927278 | 4,79E-05   | 6 |
| Nsmce1     | 4,09E-09 | 0,30721603 | 5,09E-05   | 6 |
| Rpl10a     | 4,22E-09 | 0,37048889 | 5,26E-05   | 6 |
| Lsm7       | 4,44E-09 | 0,35659036 | 5,52E-05   | 6 |
| Polr2a     | 4,65E-09 | 0,25324047 | 5,79E-05   | 6 |
| mt-Atp8    | 4,85E-09 | 0,37241703 | 6,03E-05   | 6 |
| Arid1a     | 4,95E-09 | 0,26214625 | 6,17E-05   | 6 |
| Atp5o      | 5,06E-09 | 0,46258749 | 6,30E-05   | 6 |
| Qdpr       | 5,08E-09 | 0,27049121 | 6,32E-05   | 6 |
| Eny2       | 5,28E-09 | 0,3253208  | 6,57E-05   | 6 |
| Baz1a      | 5,74E-09 | 0,31827746 | 7,14E-05   | 6 |
| Pfdn6      | 6,43E-09 | 0,30411085 | 8,01E-05   | 6 |
| Rps27a     | 6,73E-09 | 0,35840965 | 8,37E-05   | 6 |
| Cox7c      | 7,41E-09 | 0,35035831 | 9,23E-05   | 6 |
| Stub1      | 7,94E-09 | 0,32920233 | 9,88E-05   | 6 |
| Mrps17     | 8,77E-09 | 0,30483414 | 0,00010917 | 6 |
| Metap2     | 9,49E-09 | 0,44596047 | 0,00011807 | 6 |
| Eef1d      | 9,96E-09 | 0,41812773 | 0,00012395 | 6 |
| Plp2       | 1,18E-08 | 0,42917826 | 0,0001464  | 6 |
| Med30      | 1,18E-08 | 0,28284815 | 0,00014707 | 6 |
| Atp5l      | 1,22E-08 | 0,33932691 | 0,00015137 | 6 |
| Rpl35a     | 1,25E-08 | 0,28923683 | 0,00015498 | 6 |
| Acp5       | 1,29E-08 | 0,71256474 | 0,00016025 | 6 |
| Psm10      | 1,33E-08 | 0,26328475 | 0,00016593 | 6 |
| Magohb     | 1,52E-08 | 0,2530244  | 0,0001895  | 6 |
| Oxct1      | 1,54E-08 | 0,27746115 | 0,00019147 | 6 |
| Tagln2     | 1,60E-08 | 0,36214677 | 0,00019945 | 6 |
| Rps13      | 1,62E-08 | 0,29415546 | 0,00020213 | 6 |
| Supt16     | 1,95E-08 | 0,26141433 | 0,00024328 | 6 |
| Pcbp1      | 2,01E-08 | 0,43942523 | 0,00025014 | 6 |
| mt-Co2     | 3,65E-08 | 0,32083566 | 0,00045434 | 6 |
| Itgav      | 3,71E-08 | 0,27640856 | 0,00046227 | 6 |
| Rpl36a-ps1 | 3,98E-08 | 0,26250993 | 0,00049558 | 6 |
| Mrps26     | 4,09E-08 | 0,28269967 | 0,00050893 | 6 |
| Sf3b5      | 4,10E-08 | 0,33813563 | 0,00050984 | 6 |
| Cox5b      | 4,69E-08 | 0,3482751  | 0,00058372 | 6 |
| Rpl21      | 4,83E-08 | 0,25803949 | 0,00060165 | 6 |
| Rps24      | 4,90E-08 | 0,2590961  | 0,00060998 | 6 |
| Thoc7      | 5,09E-08 | 0,2931381  | 0,00063383 | 6 |

|         |          |            |            |   |
|---------|----------|------------|------------|---|
| Hnrnpm  | 5,27E-08 | 0,32592977 | 0,00065597 | 6 |
| Pdcd5   | 5,32E-08 | 0,31199313 | 0,00066257 | 6 |
| Ywhah   | 5,44E-08 | 0,33155694 | 0,0006768  | 6 |
| Sec11c  | 5,52E-08 | 0,41996169 | 0,00068654 | 6 |
| Vma21   | 5,57E-08 | 0,28624925 | 0,00069275 | 6 |
| Parl    | 5,98E-08 | 0,32950347 | 0,0007445  | 6 |
| Rpl22l1 | 6,24E-08 | 0,47211363 | 0,00077689 | 6 |
| Rpl32   | 6,40E-08 | 0,29868847 | 0,00079699 | 6 |
| Psm14   | 6,47E-08 | 0,28203588 | 0,00080575 | 6 |
| Rsl1d1  | 6,56E-08 | 0,25326911 | 0,00081635 | 6 |
| Fkbp4   | 6,63E-08 | 0,25878173 | 0,0008246  | 6 |
| Cct8    | 6,93E-08 | 0,33908884 | 0,00086261 | 6 |
| Atp5j2  | 7,14E-08 | 0,30094515 | 0,00088866 | 6 |
| Gm10073 | 7,32E-08 | 0,28405907 | 0,0009107  | 6 |
| Rps3a1  | 7,47E-08 | 0,31051827 | 0,0009303  | 6 |
| Tomm5   | 1,01E-07 | 0,36470079 | 0,00125518 | 6 |
| Rps15a  | 1,08E-07 | 0,27988103 | 0,00134265 | 6 |
| Ndufc2  | 1,23E-07 | 0,35759382 | 0,00153185 | 6 |
| Gm10076 | 1,24E-07 | 0,40613758 | 0,00154703 | 6 |
| Cox20   | 1,48E-07 | 0,31988695 | 0,00184298 | 6 |
| Rdx     | 1,77E-07 | 0,33544345 | 0,00220904 | 6 |
| Pdpk1   | 1,80E-07 | 0,26280324 | 0,00224575 | 6 |
| Arl8b   | 1,94E-07 | 0,25278501 | 0,00241413 | 6 |
| Rpl30   | 2,03E-07 | 0,29419988 | 0,00252223 | 6 |
| Rps10   | 2,03E-07 | 0,31324585 | 0,00253218 | 6 |
| Cacybp  | 2,07E-07 | 0,30213366 | 0,00257646 | 6 |
| Cyc1    | 2,38E-07 | 0,37527474 | 0,00296521 | 6 |
| Clic4   | 2,41E-07 | 0,25358921 | 0,002999   | 6 |
| Chchd1  | 2,54E-07 | 0,32082503 | 0,00316424 | 6 |
| Bub3    | 2,75E-07 | 0,37448478 | 0,00341959 | 6 |
| Vdac1   | 2,79E-07 | 0,32610463 | 0,00347027 | 6 |
| Rpl23   | 2,94E-07 | 0,30160866 | 0,00365814 | 6 |
| Ndufa5  | 3,11E-07 | 0,34978767 | 0,00387184 | 6 |
| Gspt1   | 3,40E-07 | 0,2895831  | 0,00422734 | 6 |
| Atp5b   | 3,46E-07 | 0,38489653 | 0,0043081  | 6 |
| Ndufa2  | 3,50E-07 | 0,26427125 | 0,00435045 | 6 |
| Cenpx   | 4,05E-07 | 0,3504096  | 0,00504    | 6 |
| Tceal9  | 4,06E-07 | 0,27193011 | 0,00504946 | 6 |
| Snrnp70 | 4,28E-07 | 0,36721039 | 0,00532416 | 6 |
| Sec31a  | 4,45E-07 | 0,28762519 | 0,00554316 | 6 |
| Txn1    | 4,69E-07 | 0,33920592 | 0,00583322 | 6 |
| Emg1    | 5,65E-07 | 0,32725077 | 0,00703002 | 6 |
| Nol7    | 6,29E-07 | 0,35499573 | 0,00783155 | 6 |
| Etfb    | 7,71E-07 | 0,3136727  | 0,00959821 | 6 |
| Pcbd2   | 7,86E-07 | 0,2554483  | 0,00978367 | 6 |
| Slc25a4 | 8,35E-07 | 0,33403375 | 0,0103969  | 6 |
| Nans    | 9,03E-07 | 0,28151813 | 0,01124192 | 6 |
| Lmo4    | 9,49E-07 | 0,27582153 | 0,011806   | 6 |
| Polr2f  | 9,70E-07 | 0,25661591 | 0,01207704 | 6 |
| Mrps36  | 9,88E-07 | 0,27784457 | 0,01229534 | 6 |
| Mrpl57  | 1,14E-06 | 0,26659324 | 0,01424129 | 6 |
| Eif5a   | 1,15E-06 | 0,43003451 | 0,0143245  | 6 |
| Ndufv2  | 1,25E-06 | 0,33112471 | 0,0155421  | 6 |
| Srrm1   | 1,32E-06 | 0,27878571 | 0,01641636 | 6 |
| Rpl13a  | 1,36E-06 | 0,29281046 | 0,01691139 | 6 |
| Mrps14  | 1,37E-06 | 0,29552681 | 0,01703633 | 6 |
| Eif3a   | 1,39E-06 | 0,35127666 | 0,01732849 | 6 |
| Eif3c   | 1,40E-06 | 0,3398678  | 0,01742425 | 6 |
| Bag1    | 1,71E-06 | 0,26346826 | 0,02122446 | 6 |
| Eef1b2  | 1,96E-06 | 0,43625022 | 0,02437765 | 6 |
| Rock2   | 1,96E-06 | 0,32568774 | 0,02445137 | 6 |
| Usmg5   | 2,24E-06 | 0,3686306  | 0,02785013 | 6 |
| Lmna    | 2,61E-06 | 0,29930825 | 0,03242373 | 6 |
| Rps5    | 2,74E-06 | 0,26746413 | 0,03412446 | 6 |
| Tomm7   | 2,75E-06 | 0,34938948 | 0,03417394 | 6 |
| mt-Nd3  | 2,75E-06 | 0,38181193 | 0,03428614 | 6 |
| Psm1    | 2,83E-06 | 0,26068328 | 0,03525485 | 6 |
| Hsp90b1 | 2,89E-06 | 0,36388161 | 0,03601763 | 6 |
| Tomm20  | 3,44E-06 | 0,35296419 | 0,04287484 | 6 |
| Ndufb7  | 3,71E-06 | 0,27113468 | 0,04620539 | 6 |
| Cbx1    | 3,72E-06 | 0,26732133 | 0,04626286 | 6 |



|               |            |            |            |   |
|---------------|------------|------------|------------|---|
| Anapc11       | 3,85E-06   | 0,26632789 | 0,04796616 | 6 |
| Rnf7          | 3,96E-06   | 0,30146646 | 0,04929711 | 6 |
| Hnrnpa3       | 4,37E-06   | 0,30067031 | 0,05444578 | 6 |
| Vdac2         | 4,47E-06   | 0,33509107 | 0,055691   | 6 |
| Snrpc         | 4,54E-06   | 0,28929702 | 0,05644561 | 6 |
| Cyb5r3        | 4,55E-06   | 0,35110463 | 0,05668139 | 6 |
| Slirp         | 5,10E-06   | 0,2860517  | 0,06352508 | 6 |
| Snrnp27       | 5,53E-06   | 0,25493993 | 0,06878196 | 6 |
| Denr          | 6,22E-06   | 0,30205254 | 0,07736963 | 6 |
| Psmb7         | 6,29E-06   | 0,36362627 | 0,07829895 | 6 |
| Uqcrrs1       | 7,05E-06   | 0,29531247 | 0,08775255 | 6 |
| Ndufb11       | 7,16E-06   | 0,28152305 | 0,08909862 | 6 |
| Ndufb6        | 9,12E-06   | 0,32454062 | 0,11345588 | 6 |
| Atp5g1        | 9,34E-06   | 0,4074484  | 0,1163058  | 6 |
| Ptms          | 9,52E-06   | 0,39670917 | 0,11852388 | 6 |
| Atp5f1        | 9,76E-06   | 0,30728616 | 0,1215063  | 6 |
| Uqcrq         | 1,05E-05   | 0,29533438 | 0,13031141 | 6 |
| Eif6          | 1,12E-05   | 0,28344297 | 0,13913246 | 6 |
| mt-Nd4l       | 1,13E-05   | 0,34417784 | 0,1410999  | 6 |
| Hspa9         | 1,16E-05   | 0,26259128 | 0,1441556  | 6 |
| Ctnnb1        | 1,19E-05   | 0,26815574 | 0,14810294 | 6 |
| Cnih4         | 1,24E-05   | 0,25765843 | 0,1548306  | 6 |
| mt-Atp6       | 1,55E-05   | 0,25623545 | 0,19251778 | 6 |
| Cox6c         | 1,77E-05   | 0,26010022 | 0,21985833 | 6 |
| 1110004F10Rik | 1,92E-05   | 0,27399906 | 0,23946097 | 6 |
| Ndufs5        | 2,01E-05   | 0,30388789 | 0,25042157 | 6 |
| Vim           | 2,23E-05   | 0,27421122 | 0,27811761 | 6 |
| Rps2          | 2,46E-05   | 0,35723744 | 0,3059487  | 6 |
| Sdhd          | 2,56E-05   | 0,28864224 | 0,31802495 | 6 |
| M6pr          | 2,58E-05   | 0,30400791 | 0,32083805 | 6 |
| Eloc          | 2,71E-05   | 0,28099539 | 0,33752761 | 6 |
| Phb2          | 2,75E-05   | 0,29105241 | 0,34260539 | 6 |
| Rpl14         | 2,77E-05   | 0,27308819 | 0,34433775 | 6 |
| Mrpl52        | 3,06E-05   | 0,35345136 | 0,38118535 | 6 |
| Rpl18         | 3,08E-05   | 0,26887038 | 0,38310297 | 6 |
| Pσμα6         | 3,16E-05   | 0,26974824 | 0,3930101  | 6 |
| U2af1         | 4,17E-05   | 0,26395283 | 0,51884022 | 6 |
| Ndufb10       | 4,27E-05   | 0,26089674 | 0,53148548 | 6 |
| 1110008F13Rik | 4,28E-05   | 0,25379723 | 0,53211925 | 6 |
| Myadm         | 5,92E-05   | 0,31758382 | 0,73646248 | 6 |
| Fkbp2         | 6,87E-05   | 0,28021946 | 0,85557324 | 6 |
| Mmp14         | 9,40E-05   | 0,27401935 | 1          | 6 |
| Psmc3         | 0,00012239 | 0,25205681 | 1          | 6 |
| Park7         | 0,00013808 | 0,30423668 | 1          | 6 |
| Ndufb8        | 0,00015853 | 0,25074767 | 1          | 6 |
| Mt2           | 0,00017648 | 0,34842391 | 1          | 6 |
| mt-Co3        | 0,00018067 | 0,2915566  | 1          | 6 |
| Tubb2a        | 0,00021781 | 0,31976606 | 1          | 6 |
| Rps18         | 0,00021943 | 0,29807477 | 1          | 6 |
| Ldha          | 0,00024571 | 0,27450434 | 1          | 6 |
| Slc25a5       | 0,00025727 | 0,30089839 | 1          | 6 |
| Uqcc2         | 0,00032416 | 0,26695692 | 1          | 6 |
| Cops9         | 0,0003607  | 0,2779373  | 1          | 6 |
| Mdh2          | 0,00039658 | 0,36079315 | 1          | 6 |
| Wdr89         | 0,00048296 | 0,25236736 | 1          | 6 |
| BC005537      | 0,00058454 | 0,29585233 | 1          | 6 |
| Mt1           | 0,0009718  | 0,36513628 | 1          | 6 |
| Vcp           | 0,00143034 | 0,27435614 | 1          | 6 |
| mt-Co1        | 0,00161289 | 0,25435897 | 1          | 6 |
| Tpm4          | 0,00279989 | 0,31038466 | 1          | 6 |
| Gm42418       | 0,00837101 | 0,85374956 | 1          | 6 |
