# Supplementary material for: Locally renewing resident synovial macrophages provide a protective barrier for the joint
Source: Springer Nature journal article supplement (doi:10.1038/s41586-019-1471-1), 2019-08-07
Supplement: 41586_2019_1471_MOESM4_ESM.pdf [file 41586_2019_1471_MOESM4_ESM.pdf]

**Supplementary Table 3: Supplemental experimental procedures and key resources**

| Experimental Models: Organisms/Strains          |                                                                        |                        |            |
|-------------------------------------------------|------------------------------------------------------------------------|------------------------|------------|
| Strain Abbreviation                             | Strain                                                                 | Source                 | Identifier |
| Mouse: <i>C57BL/6</i>                           | C57BL/6J                                                               | Charles River          | 632        |
| Mouse: <i>C57BL/6</i>                           | C57BL/6JRj                                                             | Janvier Labs           |            |
| Mouse: <i>Cx3cr1<sup>cre</sup>:R26-tdTomato</i> | Tg(Cx3cr1-cre)MW126Gsat/Mmucd                                          | MMRRC                  | 036395-UCD |
|                                                 | Mouse: B6;129S6- <i>Gt(ROSA)26Sor<sup>tm9(CAG-tdTomato)Hze/J</sup></i> | The Jackson Laboratory | 007905     |
| Mouse: <i>DsRed</i>                             | STOCK Tg(ACTB-DsRed*MST)1Nagy/J, DsRed.T3                              | The Jackson Laboratory | 005441     |
| Mouse: <i>Cx3cr1<sup>creER</sup></i>            | B6.129P2(C)- <i>Cx3cr1<sup>tm2.1(cre/ERT2)Jung/J</sup></i>             | The Jackson Laboratory | 020940     |
| Mouse: <i>CSF1R<sup>creER</sup></i>             | FVB-Tg(Csf1r-cre/Esr1*)1Jwp/J                                          | The Jackson Laboratory | 019098     |
| Mouse: <i>iDTR</i>                              | C57BL/6- <i>Gt(ROSA)26Sortm1(HBEGF)Awai/J</i>                          | The Jackson Laboratory | 007900     |
| Mouse: <i>tdTomato</i>                          | B6;129S6- <i>Gt(ROSA)26Sor<sup>tm9(CAG-tdTomato)Hze/J</sup></i>        | The Jackson Laboratory | 007905     |
| Mouse: <i>CD115DTR</i>                          | C57BL/6-Tg(Csf1r-HBEGF/mCherry)1Mnz/J                                  | The Jackson Laboratory | 024046     |
| Mouse: <i>Cx3cr1<sup>gfp</sup></i>              | B6.129P-Cx3cr1tm1Litt/J                                                | The Jackson Laboratory | 005582     |

| Antibodies |              |           |         |        |                 |          |               |        |         |          |             |
|------------|--------------|-----------|---------|--------|-----------------|----------|---------------|--------|---------|----------|-------------|
| Antigen    | Conjugation  | Conc.     | Isotype | Host   | Reactivity      | Clone    | Source        | Cat#   | Lot#    | Dilution | Application |
| ApoE       | unconjugated | 0.5 mg/ml | IgG     | rabbit | Human/Mouse/Rat | 16H22L18 | Thermo Fisher | 701241 | 1984882 | 1:200    | IF          |
| CD1c       | PerCP/Cy5.5  | 0.2 mg/ml | IgG1, κ | mouse  | human           | L161     | Biolegend     | 331513 | B267879 | 1:500    | FC          |

| Antibodies |                      |           |          |        |               |            |             |          |             |           |             |
|------------|----------------------|-----------|----------|--------|---------------|------------|-------------|----------|-------------|-----------|-------------|
| Antigen    | Conjugation          | Conc.     | Isotype  | Host   | Reactivity    | Clone      | Source      | Cat#     | Lot#        | Dilution  | Application |
| CD11b      | PE/Cy7               | 0.2 mg/ml | IgG2b, κ | rat    | mouse/human   | M1/70      | BioLegend   | 101216   | B185646     | 1:500     | FC          |
| CD11b      | AF 488               | 0.1mg/ml  | IgG1, κ  | mouse  | human         | LM2        | BioLegend   | 393107   | B261594     | 1:500     | FC          |
| CD14       | PE-Cy7               | 0.2mg/ml  | IgG1, κ  | mouse  | human         | 63D3       | BioLegend   | 367111   | B252403     | 1:500     | FC          |
| CD15       | Brilliant Violet 421 | 50µg/ml   | IgG1, κ  | mouse  | human         | W6D3       | BioLegend   | 323039   | B263781     | 1:500     | FC          |
| CD20       | Brilliant Violet 421 | 25µg/ml   | IgG2b, κ | mouse  | human         | 2H7        | BioLegend   | 302329   | B257594     | 1:500     | FC          |
| CD31       | AF 647               | 0.5 mg/ml | IgG2a, κ | rat    | mouse         | MEC13.3    | BioLegend   | 102516   | 234197      | 2.5 µg/m. | LSFM        |
| CD31       | PE                   | 0.2mg/ml  | IgG2a, κ | rat    | mouse         | MEC13.3    | BioLegend   | 102507   | B129965     | 1:500     | FC          |
| CD45.2     | AF 700               | 0.5 mg/ml | IgG2a, κ | mouse  | mouse         | 104        | BioLegend   | 109822   | B202497     | 1:500     | FC          |
| CD45       | Brilliant Violet 421 | 12µg/ml   | IgG2a, κ | mouse  | mouse         | 30-F11     | BioLegend   | 103133   | B263588     | 1:500     | FC          |
| CD45       | AF 700               | 0.1mg/ml  | IgG1, κ  | mouse  | human         | 2D1        | BioLegend   | 368513   | B248833     | 1:500     | FC          |
| CD68       | AF 594               | 0.5 mg/ml | IgG2a    | rat    | mouse         | FA-11      | BioLegend   | 137020   | B239125     | 1:400     | IF          |
| CD68       | AF 647               | 0.5 mg/ml | IgG2a    | rat    | mouse         | FA-11      | BioLegend   | 137004   | B153907     | 1:400     | IF          |
| CD68       | unconjugated         | 0.5 mg/ml | IgG2b, κ | mouse  | human         | Y1/82A     | BioLegend   | 333801   | B200949     | 1:200     | IF          |
| CD68       | unconjugated         | .0 mg/ml  | IgG1, κ  | mouse  | mammals/human | KP1        | Abcam       | ab955    | GR3230929-1 | 1:200     | IF          |
| CD68       | AF 594               | 0.2 mg/ml | IgG2b    | mouse  | human         | 298807     | R&D systems | IC20401T | 1471045     | 1:200     | IF          |
| CSF1R      | APC                  | 0.2 mg/ml | IgG2a, κ | rat    | mouse         | AFS98      | BioLegend   | 135510   | B183456     | 1:500     | FC          |
| CSF1R      | AF 647               | 0.5mg/ml  | IgG2a, κ | rat    | mouse         | AFS98      | BioLegend   | 135530   | B256616     | 1:200     | IF          |
| Claudin 2  | unconjugated         | 1.0 mg/ml | IgG      | rabbit | mammals/human | polyclonal | Abcam       | ab53032  | GR314368-11 | 1:200     | IF          |

| Antibodies             |                  |           |          |        |               |            |                   |           |            |          |             |
|------------------------|------------------|-----------|----------|--------|---------------|------------|-------------------|-----------|------------|----------|-------------|
| Antigen                | Conjugation      | Conc.     | Isotype  | Host   | Reactivity    | Clone      | Source            | Cat#      | Lot#       | Dilution | Application |
| Claudin 5              | unconjugated     | 1.0 mg/ml | IgG      | rabbit | mouse/human   | polyclonal | Abcam             | ab15106   | GR3182385  | 1:200    | IF          |
| Claudin 13             | unconjugated     | 1.0 mg/ml | IgG      | rabbit | mouse         | polyclonal | Invitrogen        | PA1-24420 | TA2507851C | 1:200    | IF          |
| Connexin 43            | unconjugated     | 1.0 mg/ml | IgG      | rabbit | mammals/human | polyclonal | Sigma Aldrich     | C6219     | 027144804V | 1:200    | IF          |
| Donkey anti-Rabbit IgG | AF 647           | 2.0 mg/ml | IgG      | donkey | rabbit        | polyclonal | Life Technologies | A-31573   | 1563697    | 1:200    | IF          |
| Donkey anti-Rabbit IgG | AF 488           | 2.0 mg/ml | IgG      | donkey | mouse         | polyclonal | Life Technologies | A-21206   | 1644644    | 1:200    | IF          |
| E-Cadherin             | PE               | 0.2 mg/ml | IgG1, κ  | rat    | mouse/human   | DECMA-1    | BioLegend         | 147303    | B260705    | 1:500    | FC          |
| F4/80                  | AF 647           | 0.5 mg/ml | IgG2a, κ | rat    | mouse         | BM8        | BioLegend         | 123122    | B212680    | 1:400    | IF, FC      |
| F4/80                  | FITC             | 0.5 mg/ml | IgG2a, κ | rat    | mouse         | BM8        | BioLegend         | 123108    | B177257    | 1:400    | IF          |
| HLA-DR                 | PE               | 0.1mg/ml  | IgG2b, κ | mouse  | human         | Tü36       | BioLegend         | 361605    | B261328    | 1:500    | FC          |
| IgG2b, κ Isotype ctrl  | APC              | 0.2 mg/ml | IgG2b, κ | rat    | -             | RTK4530    | BioLegend         | 400611    |            | 1:500    | FC          |
| Ki67                   | AF 647           | 0.5 mg/ml | IgG2a, κ | rat    | mouse         | 16A8       | BioLegend         | 652407    | B238782    | 1:200    | IF          |
| Ly6C                   | AF 488           | 0.5 mg/ml | IgG2c, κ | rat    | mouse         | HK1.4      | BioLegend         | 128022    | B248739    | 1:400    | FC          |
| Ly6G                   | Brilliant Violet | 0.2 mg/ml | IgG2a, κ | rat    | mouse         | 1A8        | BioLegend         | 127627    | B193096    | 1:400    | FC          |
| Ly6G                   | FITC             | 0.5 mg/ml | IgG2a, κ | rat    | mouse         | 1A8        | BioLegend         | 127606    | B175677    | 1:400    | FC          |
| Ly6G                   | AF 488           | 0.5 mg/ml | IgG2a, κ | rat    | mouse         | 1A8        | BioLegend         | 127626    | B240194    | 1:400    | IF          |
| Ly6G                   | AF647            | 0.5 mg/ml | IgG2a, κ | rat    | mouse         | 1A8        | BioLegend         | 127610    | B204928    | 1:200    | IF, LSMF    |

| Antibodies |              |           |          |        |             |             |               |           |              |          |             |
|------------|--------------|-----------|----------|--------|-------------|-------------|---------------|-----------|--------------|----------|-------------|
| Antigen    | Conjugation  | Conc.     | Isotype  | Host   | Reactivity  | Clone       | Source        | Cat#      | Lot#         | Dilution | Application |
| MHCII      | PE           | 0.2mg/ml  | IgG2b, κ | rat    | mouse       | M5/114.15.2 | BioLegend     | 107608    | B130064      | 1:200    | IF          |
| Relm alpha | unconjugated | 0.2mg/ml  | IgG      | rabbit | mouse       | polyclonal  | Abcam         | Ab39626   | GR128715-1   | 1:200    | IF          |
| Trem2      | unconjugated | 0.5 mg/ml | IgG2b    | rat    | mouse/human | RM0139-5J46 | Abcam         | ab86491   | GR3207091-11 | 1:200    | IF          |
| Trem2      | APC          |           | IgG2B    | rat    | mouse/human | 237920      | R&D systems   | FAB17291A | AADSO17111   | 1:500    | FC          |
| ZO-1       | unconjugated | 1.0 mg/ml | IgG      | rabbit | mouse/human | polyclonal  | EMD Millipore | AB2272    | 2905383      | 1:100    | IF          |

| Molecular dyes                     |                                                |         |               |             |          |          |             |
|------------------------------------|------------------------------------------------|---------|---------------|-------------|----------|----------|-------------|
| Dye                                | Conjugation/ Ex/EM [µm]                        | Conc.   | Source        | Cat#        | Lot#     | Dilution | Application |
| DAPI                               | 340/488                                        | 1 µg/ml | Roche         | 10236276001 | 28114320 | 1:2000   | IF          |
| Phalloidin                         | Alexa Fluor 647                                | 300 U   | Thermo Fisher | A22287      |          | 1:100    | IF          |
| Phalloidin                         | Alexa Fluor 488                                | 300 U   | Thermo Fisher | A12379      | 1687886  | 1:100    | IF          |
| Sytox Blue                         | 444/480                                        | 1 mM    | Thermo Fisher | S34857      |          | 1:100    | IF          |
| Zombie Aqua™ Fixable Viability Kit | Excitation Laser 405nm, Maximum emission 516nm |         | BioLegend     | 423101      |          | 1:1000   | FC          |

| Chemicals, Reagents  |           |               |           |
|----------------------|-----------|---------------|-----------|
| Reagent/Resource     | Source    | Cat#          | Lot#      |
| Aqua ad iniectabilia | Braun     | 6724092.00.00 | 152518061 |
| BSA                  | Carl Roth | CP84.2        | 097255477 |

| Chemicals, Reagents                   |                         |               |           |
|---------------------------------------|-------------------------|---------------|-----------|
| Reagent/Resource                      | Source                  | Cat#          | Lot#      |
| Cacodylic acid sodium salt trihydrate | Carl Roth               | 5169.2        |           |
| Cryofilm Type 2C(9)                   | Section-Lab Co. Ltd.    | C-MK001-A2    | H300128   |
| Dako Fluorescence Mounting Medium     | Dako North America Inc. | S3023         | 10134819  |
| ddH2O                                 | Invitrogen              | 10977-035     | 1896175   |
| DNase                                 | Sigma                   | 9003-98-9     | SLBV1446  |
| D-Saccharose                          | Carl Roth               | 9097.1        | 108268247 |
| Dulbeco's PBS (DPBS)                  | Sigma-Aldrich           | D8537         | 1971145   |
| DT (Diphtheria toxin)                 | Sigma-Aldrich           | D0564         |           |
| EDTA (5.0 M, pH=8.0)                  | Invitrogen              | AM9260G       | 00478853  |
| EdU (EdU-Flow Cytometry Kit 488)      | Baseclick GmbH          | BCK-FC488-100 |           |
| Ethanol 70.0%                         | Carl Roth               | 64-17-5       | 238272008 |
| Ethanol ≥98.9%                        | Carl Roth               | 64-17-15      | 118268980 |
| Ethyl cinnamate                       | Sigma-Aldrich           | 112372        | STBH1248  |
| Glutaraldehyde                        | Carl Roth               | 4157.1        |           |
| Glycidether 100                       | Carl Roth               | 8619.2        |           |
| Glycidether Accelerator DMP-30        | Carl Roth               | 8621.1        |           |
| Glycidether Hardener DBA              | Carl Roth               | 8623.2        |           |
| Glycidether Hardener MNA              | Carl Roth               | 8639.2        |           |
| (Hydropropyl)methyl cellulose         | Sigma-Aldrich           | 9004-65-3     | MKCB1715V |
| Imatinib Mesylate                     | Selleckchem             | S1026         | S102607   |

| Chemicals, Reagents                   |                     |            |            |
|---------------------------------------|---------------------|------------|------------|
| Reagent/Resource                      | Source              | Cat#       | Lot#       |
| Isofluran                             | Abbvie              |            | 6070961    |
| Osmium tetroxide                      | Carl Roth           | 8371.3     |            |
| Peanut oil                            | Sigma-Aldrich       | 8002-03-7  | MKBD0023   |
| Paraformaldehyde                      | Carl Roth           | 0335.3     |            |
| Saponin, from Quillaja bark           | Apollo Scientific   | BIS4332    | AS439793   |
| Tamoxifen                             | Biomol              | 10540-29-1 |            |
| Tamoxifen (Tamoxifen containing food) | envigo              | TD.130859  |            |
| (Z)-4-Hydroxytamoxifen                | Sigma Aldrich       | H7904      |            |
| Tissue Tec O.C.T compound             | Sakura Finetek GmbH | 4583       | 1707301015 |
| Tween80                               | Sigma-Aldrich       | 8002-03-7  | BCBW3990   |

| Software/Instruments |                                                                                                                                                 |                   |
|----------------------|-------------------------------------------------------------------------------------------------------------------------------------------------|-------------------|
| Resource             | Source                                                                                                                                          | Identifier        |
| CytExpert            | Beckman Coulter, Brea, California, USA                                                                                                          | Version 2.2.0.97  |
| FlowJo               | FlowJo, LLC                                                                                                                                     | Version 7.6.5     |
| Huygens Professional | Scientific Volume Imaging, The Netherlands, <a href="http://svi.nl">__http://svi.nl__</a>                                                       | 17.10             |
| Horos                | Horos Project, <a href="https://horosproject.org/">https://horosproject.org/</a>                                                                | GPL 3.0           |
| ImageJ               | Rasband, W.S., U.S. National Institutes of Health, Bethesda, Maryland, USA, <a href="https://imagej.nih.gov/ij/">https://imagej.nih.gov/ij/</a> | Version 1.8.0_112 |
| Imaris               | Bitplane AG, Zurich, Switzerland                                                                                                                | Version 9.1       |
| MacsQuantify™        | Miltenyi Biotec GmbH, Bergisch Gladbach, Germany                                                                                                | Version 2.5       |

| Software/Instruments                           |                                          |              |
|------------------------------------------------|------------------------------------------|--------------|
| Resource                                       | Source                                   | Identifier   |
| Kaluza                                         | Beckman Coulter, Brea, California, USA   | Version 1.5a |
| Zen Blue                                       | Zeiss, Oberkochen, Germany               | Version 2.3  |
| ClinScan 70/30 7 Tesla MRI System              | Bruker Corporation, Billerica, MA USA    | n.a.         |
| CytoFLex S                                     | Beckman Coulter, Brea, California, USA   | n.a.         |
| Leica TCS SP 5 II Confocal                     | Leica Microsystems, Wetzlar, Germany     | n.a.         |
| Leica CM 3050 S                                | Leica Microsystems, Wetzlar, Germany     | n.a.         |
| Microtome Reichert Ultracut S                  | Leica Microsystems, Wetzlar, Germany     | n.a.         |
| MoFlo XDP                                      | Beckman Coulter, Brea, California, USA   | n.a.         |
| Nicon Eclipse Ni-U microscope                  | Nicon Instruments Europe B.V.            | n.a.         |
| Transmission electron microscope JEM 1400 Plus | Jeol GmbH, Freising, Germany             | n.a.         |
| Ultramicroscope II                             | LaVision BioTec GmbH, Bielefeld, Germany | n.a.         |
| Zeiss Spinning Disc Axio Observer.Z1           | Zeiss, Oberkochen, Germany               | n.a.         |

IF = Immunofluorescence

FC = Flow cytometry

LSFM = Light sheet fluorescence microscopy

n.a. = not available
